# Supplementary material for: Micro-RNA Binding Site Polymorphisms in the WFS1 Gene Are Risk Factors of Diabetes Mellitus
Source: PLoS One. 2015 Oct 1;10(10):e0139519. doi: 10.1371/journal.pone.0139519 (PMC4591293; doi:10.1371/journal.pone.0139519)
Supplement: S3 Table — This file contains the genotype data of the T2DM patients and its control group. (PED) [file pone.0139519.s003.ped]

501	IZ936	0	0	2	2	0	0	1	3	1	3	0	0	1	3	1	3	0	0
502	CC101	0	0	2	2	3	3	3	3	0	0	3	3	1	1	1	3	2	2
503	CC102	0	0	2	2	3	3	1	1	1	1	3	3	3	3	1	3	3	3
504	CC103	0	0	1	2	1	3	1	3	1	3	3	3	1	3	3	3	2	3
505	CC105	0	0	1	2	3	3	3	3	3	3	3	3	1	1	3	3	2	2
506	CC107	0	0	2	2	3	3	1	3	1	3	3	3	1	3	1	3	2	3
507	CC108	0	0	2	2	3	3	3	3	3	3	1	3	1	1	3	3	2	2
508	CC109	0	0	1	2	3	3	3	3	3	3	3	3	1	1	3	3	2	2
509	CC110	0	0	1	2	1	3	1	3	1	3	3	3	1	3	3	3	3	3
510	CC111	0	0	1	2	3	3	3	3	3	3	3	3	1	1	3	3	2	2
511	CC112	0	0	1	2	3	3	3	3	3	3	3	3	1	1	3	3	2	2
512	CC113	0	0	1	2	1	3	1	3	1	3	3	3	1	3	3	3	2	3
513	CC114	0	0	1	2	1	3	1	3	1	3	3	3	1	3	3	3	2	3
514	CC115	0	0	2	2	3	3	1	3	1	3	3	3	1	3	1	3	2	3
515	CC116	0	0	2	2	3	3	1	3	1	3	1	3	1	3	1	3	2	3
516	CC117	0	0	1	2	3	3	3	3	0	0	3	3	1	1	0	0	2	2
517	CC118	0	0	2	2	3	3	3	3	3	3	3	3	1	1	3	3	2	2
518	CC119	0	0	2	2	3	3	3	3	0	0	3	3	1	1	3	3	2	2
519	CC120	0	0	2	2	3	3	1	1	1	1	3	3	3	3	3	3	3	3
520	CC121	0	0	1	2	3	3	3	3	3	3	3	3	1	1	3	3	2	2
521	CC122	0	0	2	2	3	3	3	3	3	3	3	3	1	1	3	3	2	2
522	CC123	0	0	1	2	3	3	3	3	3	3	3	3	1	1	3	3	2	2
523	CC124	0	0	1	2	1	3	1	1	1	1	3	3	3	3	3	3	3	3
524	CC125	0	0	2	2	1	3	1	3	1	3	3	3	1	3	3	3	2	3
525	CC126	0	0	2	2	1	3	1	3	1	3	3	3	1	3	3	3	2	3
526	CC127	0	0	2	2	3	3	3	3	3	3	3	3	1	1	0	0	2	2
527	CC128	0	0	1	2	1	3	1	3	1	3	3	3	1	3	3	3	2	3
528	CC129	0	0	1	2	3	3	1	3	1	3	3	3	1	3	3	3	3	3
529	CC130	0	0	2	2	3	3	3	3	3	3	3	3	1	1	3	3	2	2
530	CC131	0	0	2	2	3	3	1	3	1	3	3	3	1	3	3	3	2	3
531	CC132	0	0	2	2	3	3	3	3	3	3	3	3	1	1	3	3	2	2
532	CC133	0	0	1	2	3	3	1	3	1	3	3	3	1	3	3	3	2	3
533	CC134	0	0	1	2	1	1	1	1	1	1	3	3	3	3	3	3	3	3
534	CC135	0	0	1	2	3	3	3	3	3	3	3	3	1	3	3	3	2	3
535	CC136	0	0	2	2	3	3	3	3	3	3	3	3	1	1	3	3	2	3
536	CC137	0	0	1	2	3	3	3	3	3	3	3	3	1	1	3	3	2	2
537	CC138	0	0	2	2	3	3	1	3	1	3	3	3	1	3	3	3	2	3
538	CC139	0	0	1	2	3	3	1	3	1	3	3	3	1	3	3	3	2	3
539	CC140	0	0	2	2	1	3	1	3	1	3	3	3	1	3	3	3	3	3
540	CC141	0	0	1	2	1	3	1	3	1	3	3	3	1	3	3	3	2	3
541	CC142	0	0	2	2	3	3	1	3	1	3	3	3	1	3	3	3	3	3
542	CC143	0	0	1	2	3	3	1	3	1	3	3	3	1	3	3	3	3	3
543	CC144	0	0	2	2	1	1	1	1	1	1	3	3	3	3	1	3	3	3
544	CC145	0	0	2	2	1	3	1	3	1	3	3	3	1	3	3	3	2	3
545	CC146	0	0	2	2	3	3	3	3	3	3	3	3	1	1	3	3	2	2
546	CC147	0	0	1	2	3	3	3	3	3	3	3	3	1	1	3	3	2	2
547	CC148	0	0	2	2	3	3	1	3	1	3	3	3	1	3	3	3	2	3
548	CC149	0	0	1	2	3	3	1	3	1	3	3	3	1	3	3	3	2	3
549	CC150	0	0	1	2	3	3	3	3	3	3	3	3	1	1	3	3	2	2
550	CC151	0	0	1	2	3	3	1	3	1	3	3	3	1	3	3	3	2	3
551	CC152	0	0	2	2	1	3	1	3	1	3	3	3	1	3	3	3	2	3
552	CC154	0	0	1	2	1	3	1	3	1	3	3	3	1	3	3	3	2	3
553	CC161	0	0	2	2	3	3	3	3	3	3	3	3	1	1	3	3	2	2
554	CC162	0	0	2	2	3	3	3	3	3	3	1	3	1	1	1	3	2	2
555	CC166	0	0	1	2	1	3	1	3	1	3	3	3	1	3	3	3	3	3
556	CC171	0	0	1	2	3	3	3	3	3	3	3	3	1	1	3	3	2	2
557	CC172	0	0	2	2	3	3	3	3	3	3	3	3	1	1	3	3	2	2
558	CC173	0	0	2	2	1	3	1	3	1	3	1	3	1	3	3	3	2	3
559	CC174	0	0	1	2	3	3	3	3	3	3	3	3	1	1	3	3	2	2
560	CC175	0	0	1	2	3	3	3	3	3	3	3	3	1	1	3	3	2	2
561	CC176	0	0	2	2	3	3	3	3	3	3	3	3	1	1	3	3	2	2
562	CC177	0	0	2	2	1	3	1	3	1	3	3	3	1	3	3	3	2	3
563	CC178	0	0	2	2	3	3	1	1	1	1	3	3	3	3	1	3	3	3
564	CC179	0	0	1	2	3	3	3	3	3	3	3	3	1	1	3	3	2	2
565	CC180	0	0	1	2	1	1	1	1	1	1	3	3	3	3	1	3	3	3
566	CC181	0	0	2	2	3	3	1	1	1	1	3	3	3	3	1	3	3	3
567	CC182	0	0	2	2	3	3	3	3	3	3	3	3	1	3	3	3	2	3
568	CC183	0	0	2	2	1	3	1	3	1	3	3	3	1	3	3	3	2	3
569	CC184	0	0	1	2	3	3	3	3	3	3	3	3	1	1	3	3	2	2
570	CC185	0	0	2	2	1	3	1	3	1	3	3	3	1	3	3	3	2	3
571	CC186	0	0	1	2	3	3	1	3	1	3	3	3	1	3	1	3	2	3
572	CC187	0	0	1	2	3	3	3	3	3	3	3	3	1	1	3	3	2	2
573	CC188	0	0	2	2	3	3	3	3	3	3	3	3	1	1	3	3	2	2
574	CC189	0	0	2	2	3	3	1	3	1	3	3	3	1	3	1	3	2	3
575	CC190	0	0	1	2	3	3	1	3	1	3	3	3	1	3	3	3	2	3
576	CC191	0	0	2	2	0	0	0	0	0	0	0	0	0	0	0	0	2	3
577	CC192	0	0	1	2	1	3	1	3	1	3	3	3	1	3	3	3	2	3
578	CC193	0	0	2	2	3	3	1	1	1	1	3	3	1	3	3	3	3	3
579	CC194	0	0	2	2	3	3	3	3	3	3	3	3	1	1	3	3	2	2
580	CC195	0	0	2	2	1	3	1	1	1	1	3	3	3	3	3	3	3	3
581	CC196	0	0	2	2	3	3	1	3	1	3	3	3	1	3	1	3	2	3
582	CC197	0	0	2	2	1	3	3	3	3	3	1	3	1	1	3	3	2	2
583	CC198	0	0	1	2	1	3	1	3	1	3	3	3	3	3	3	3	3	3
584	CC199	0	0	2	2	3	3	1	3	1	3	1	3	1	3	1	3	2	3
585	CC200	0	0	2	2	3	3	3	3	3	3	3	3	1	1	3	3	2	2
586	CC201	0	0	2	2	1	1	1	1	1	1	3	3	3	3	3	3	3	3
587	CC202	0	0	2	2	3	3	3	3	3	3	3	3	1	1	3	3	2	2
588	CC203	0	0	1	2	3	3	1	3	1	3	3	3	1	3	1	3	2	3
589	CC204	0	0	2	2	3	3	3	3	3	3	1	3	1	1	3	3	2	2
590	CC205	0	0	1	2	3	3	1	1	1	1	3	3	3	3	3	3	3	3
591	CC206	0	0	1	2	3	3	3	3	3	3	3	3	1	1	3	3	2	2
592	CC207	0	0	2	2	3	3	3	3	3	3	3	3	1	1	3	3	2	2
593	CC208	0	0	2	2	1	3	1	3	1	3	3	3	1	3	3	3	2	3
594	CC209	0	0	2	2	3	3	3	3	3	3	3	3	1	1	3	3	2	2
595	CC210	0	0	1	2	3	3	3	3	3	3	3	3	1	1	3	3	2	2
596	CC211	0	0	1	2	3	3	1	3	1	3	3	3	1	3	3	3	2	3
597	CC212	0	0	1	2	1	3	1	3	1	3	3	3	3	3	3	3	3	3
598	CC213	0	0	2	2	3	3	1	3	1	1	3	3	1	3	3	3	2	3
599	CC214	0	0	1	2	1	3	1	3	3	3	3	3	1	3	3	3	2	3
600	CC216	0	0	1	2	3	3	1	3	1	1	3	3	1	3	3	3	2	3
601	CC217	0	0	1	2	1	3	1	3	1	3	3	3	1	3	3	3	2	3
602	CC218	0	0	2	2	0	0	0	0	0	0	0	0	0	0	0	0	2	2
603	CC219	0	0	2	2	1	3	1	3	1	3	3	3	1	3	3	3	3	3
604	CC220	0	0	2	2	3	3	1	3	1	3	3	3	1	3	1	3	2	3
605	CC221	0	0	1	2	3	3	3	3	1	3	3	3	1	1	3	3	2	2
606	CC222	0	0	1	2	1	1	1	1	3	3	3	3	3	3	1	3	3	3
607	CC223	0	0	1	2	3	3	3	3	1	3	3	3	1	1	3	3	2	2
608	CC224	0	0	1	2	3	3	1	3	1	3	3	3	1	3	3	3	2	3
609	CC225	0	0	1	2	1	3	1	3	1	1	3	3	1	3	3	3	2	3
610	CC226	0	0	2	2	1	3	1	3	1	3	3	3	1	3	3	3	2	3
611	CC227	0	0	1	2	0	0	0	0	0	0	0	0	0	0	0	0	2	2
612	CC228	0	0	2	2	3	3	1	1	1	3	3	3	3	3	1	3	3	3
613	CC230	0	0	1	2	1	3	1	1	1	3	3	3	3	3	3	3	3	3
614	CC231	0	0	2	2	3	3	3	3	3	3	3	3	1	1	3	3	2	2
615	CC232	0	0	1	2	3	3	1	3	3	3	3	3	1	3	3	3	2	3
616	CC233	0	0	1	2	3	3	3	3	1	3	3	3	1	1	3	3	2	2
617	CC234	0	0	1	2	3	3	3	3	1	3	3	3	1	1	3	3	2	2
618	CC235	0	0	2	2	1	3	1	3	3	3	3	3	1	3	3	3	2	3
619	CC237	0	0	2	2	3	3	3	3	3	3	1	3	1	1	1	3	2	2
620	CC238	0	0	1	2	3	3	3	3	3	3	3	3	1	3	1	3	2	3
621	CC239	0	0	1	2	3	3	3	3	3	3	3	3	1	1	3	3	2	2
622	CC240	0	0	2	2	3	3	3	3	3	3	3	3	1	1	3	3	2	2
623	CC241	0	0	1	2	3	3	3	3	1	3	3	3	1	3	3	3	2	2
624	CC242	0	0	2	2	3	3	1	3	3	3	3	3	1	3	1	3	2	3
625	CC243	0	0	1	2	3	3	3	3	3	3	3	3	1	1	3	3	2	2
626	CC244	0	0	2	2	1	3	1	3	1	1	3	3	1	3	3	3	2	3
627	CC245	0	0	1	2	3	3	1	3	3	3	1	3	1	1	1	3	2	2
628	CC246	0	0	2	2	0	0	0	0	0	0	0	0	0	0	0	0	2	3
629	CC247	0	0	1	2	3	3	1	1	1	1	3	3	3	3	3	3	3	3
630	CC248	0	0	2	2	3	3	3	3	3	3	3	3	1	1	3	3	2	3
631	CC249	0	0	2	2	3	3	3	3	1	3	3	3	1	1	3	3	2	2
632	CC250	0	0	2	2	1	3	1	3	3	3	3	3	1	3	3	3	2	3
633	CC251	0	0	2	2	3	3	1	3	1	3	3	3	1	3	3	3	3	3
634	CC252	0	0	1	2	3	3	3	3	1	3	3	3	1	1	3	3	2	2
635	CC253	0	0	2	2	3	3	1	3	3	3	3	3	1	3	3	3	3	3
636	CC254	0	0	2	2	3	3	1	3	1	3	3	3	1	3	1	3	3	3
637	CC255	0	0	2	2	1	3	1	1	1	1	3	3	3	3	3	3	3	3
638	CC256	0	0	2	2	3	3	1	3	1	3	3	3	1	3	3	3	2	3
639	CC257	0	0	2	2	3	3	3	3	3	3	3	3	1	3	3	3	2	3
640	CC258	0	0	1	2	3	3	3	3	3	3	3	3	1	1	3	3	2	2
641	CC259	0	0	2	2	3	3	3	3	3	3	3	3	1	1	3	3	2	2
642	CC260	0	0	1	2	3	3	1	3	1	3	3	3	1	1	3	3	2	3
643	CC261	0	0	1	2	3	3	3	3	1	3	3	3	1	1	3	3	2	2
644	CC262	0	0	2	2	3	3	1	3	3	3	3	3	1	3	3	3	2	3
645	CC263	0	0	2	2	3	3	1	1	1	3	3	3	3	3	1	3	3	3
646	CC264	0	0	1	2	1	3	1	3	1	3	3	3	1	3	3	3	2	3
647	CC265	0	0	2	2	3	3	3	3	1	3	3	3	1	1	3	3	2	2
648	CC266	0	0	1	2	3	3	1	3	3	3	3	3	1	3	1	3	2	3
649	CC267	0	0	1	2	3	3	1	3	1	3	3	3	1	3	3	3	2	3
650	CC269	0	0	2	2	3	3	3	3	3	3	3	3	1	1	3	3	2	2
651	CC270	0	0	2	2	3	3	3	3	3	3	3	3	1	1	3	3	2	2
652	CC271	0	0	2	2	3	3	3	3	1	3	3	3	1	1	3	3	2	3
653	CC272	0	0	1	2	1	1	1	1	1	1	3	3	3	3	1	3	3	3
654	CC273	0	0	2	2	1	3	1	3	1	3	3	3	1	3	3	3	3	3
655	CC274	0	0	1	2	3	3	3	3	1	3	3	3	1	1	3	3	2	2
656	CC276	0	0	1	2	3	3	1	3	3	3	3	3	1	3	1	3	2	3
657	CC279	0	0	2	2	3	3	1	3	3	3	3	3	1	3	3	3	2	3
658	CC280	0	0	1	2	3	3	3	3	3	3	1	3	1	1	3	3	2	2
659	CC283	0	0	1	2	3	3	3	3	1	3	3	3	1	1	3	3	2	2
660	CC284	0	0	1	2	1	3	1	1	1	1	3	3	3	3	3	3	3	3
661	CC285	0	0	2	2	3	3	3	3	3	3	1	3	1	1	1	3	2	2
662	CC298	0	0	2	2	3	3	1	3	1	1	3	3	1	3	3	3	2	3
663	CC299	0	0	1	2	1	3	1	3	1	1	3	3	1	3	3	3	2	3
664	CC300	0	0	1	2	3	3	1	3	1	3	3	3	1	3	3	3	2	3
665	CC302	0	0	2	2	0	0	1	1	1	3	3	3	3	3	1	1	3	3
666	CC303	0	0	1	2	3	3	1	3	1	3	3	3	1	3	1	3	2	3
667	CC304	0	0	2	2	3	3	1	3	3	3	3	3	1	3	3	3	2	3
668	CC305	0	0	2	2	3	3	3	3	3	3	3	3	1	1	3	3	2	2
669	CC306	0	0	1	2	1	3	1	3	3	3	3	3	1	3	3	3	2	3
670	CC307	0	0	2	2	3	3	3	3	3	3	1	3	1	1	3	3	2	2
671	CC308	0	0	2	2	3	3	3	3	3	3	3	3	1	1	3	3	2	3
672	CC309	0	0	1	2	3	3	3	3	1	3	3	3	1	1	0	0	2	3
673	CC310	0	0	1	2	3	3	1	1	1	3	3	3	3	3	1	3	3	3
674	CC311	0	0	1	2	3	3	3	3	1	3	3	3	1	1	3	3	2	2
675	CC312	0	0	2	2	1	3	1	1	1	3	3	3	3	3	3	3	3	3
676	CC313	0	0	2	2	3	3	1	3	1	3	3	3	1	3	3	3	2	3
677	CC314	0	0	2	2	1	3	1	1	1	3	3	3	3	3	1	3	3	3
678	CC315	0	0	2	2	3	3	3	3	3	3	3	3	1	1	3	3	2	2
679	CC316	0	0	2	2	3	3	3	3	3	3	3	3	1	1	3	3	2	2
680	CC317	0	0	2	2	3	3	3	3	3	3	3	3	1	1	3	3	2	2
681	CC318	0	0	1	2	3	3	1	1	1	1	3	3	3	3	3	3	3	3
682	CC319	0	0	2	2	3	3	1	3	1	3	3	3	1	3	3	3	2	3
683	CC320	0	0	2	2	1	3	1	3	1	3	3	3	1	3	1	3	2	3
684	CC322	0	0	2	2	1	3	1	3	1	3	3	3	1	3	3	3	3	3
685	CC324	0	0	1	2	3	3	3	3	3	3	3	3	1	1	3	3	2	2
686	CC325	0	0	1	2	3	3	1	3	1	3	3	3	1	1	3	3	2	3
687	CC326	0	0	1	2	3	3	3	3	3	3	1	3	1	1	1	3	2	2
688	CC329	0	0	1	2	1	3	1	3	1	3	3	3	1	3	3	3	2	3
689	CC332	0	0	2	2	3	3	1	3	1	3	3	3	1	3	3	3	2	3
690	CC333	0	0	2	2	3	3	3	3	3	3	3	3	1	1	3	3	2	2
691	CC334	0	0	2	2	3	3	1	1	1	1	3	3	3	3	1	3	3	3
692	CC336	0	0	2	2	1	1	1	1	1	1	3	3	3	3	3	3	3	3
693	CC337	0	0	1	2	3	3	1	3	1	3	3	3	1	3	1	3	2	3
694	CC338	0	0	2	2	3	3	3	3	3	3	3	3	1	1	3	3	2	2
695	CC339	0	0	1	2	1	3	1	3	1	3	3	3	1	3	3	3	2	3
696	CC340	0	0	2	2	1	1	1	1	1	1	3	3	3	3	1	3	3	3
697	CC341	0	0	1	2	1	3	1	3	1	3	3	3	1	3	3	3	3	3
698	CC342	0	0	1	2	3	3	3	3	3	3	3	3	1	1	3	3	2	2
699	CC343	0	0	1	2	3	3	3	3	3	3	3	3	1	3	3	3	2	2
700	CC345	0	0	2	2	3	3	3	3	3	3	3	3	1	1	3	3	2	2
701	CC346	0	0	2	2	3	3	3	3	3	3	3	3	1	1	3	3	2	2
702	CC347	0	0	2	2	3	3	3	3	3	3	3	3	1	1	3	3	2	3
703	CC348	0	0	1	2	3	3	3	3	3	3	1	3	1	1	1	3	2	2
704	CC349	0	0	2	2	3	3	3	3	3	3	1	3	1	1	3	3	2	2
705	CC350	0	0	2	2	1	3	1	3	1	3	3	3	1	3	3	3	2	3
706	CC351	0	0	2	2	3	3	3	3	3	3	3	3	1	1	3	3	2	2
707	CC352	0	0	2	2	3	3	1	3	1	3	3	3	1	3	3	3	2	3
708	CC353	0	0	2	2	3	3	3	3	3	3	3	3	1	1	3	3	2	2
709	CC354	0	0	1	2	3	3	3	3	3	3	3	3	1	1	3	3	2	2
710	CC355	0	0	2	2	1	3	1	3	1	3	1	3	1	3	3	3	2	3
711	CC356	0	0	2	2	3	3	3	3	3	3	3	3	1	1	3	3	2	2
712	CC357	0	0	2	2	3	3	3	3	3	3	3	3	1	1	3	3	2	2
713	CC358	0	0	2	2	3	3	1	3	1	3	3	3	1	3	3	3	2	3
714	CC359	0	0	2	2	3	3	3	3	3	3	1	3	1	1	1	3	2	2
715	CC360	0	0	2	2	3	3	1	1	1	1	3	3	3	3	1	3	3	3
716	CC361	0	0	1	2	3	3	3	3	3	3	3	3	1	1	3	3	2	2
717	CC362	0	0	1	2	3	3	3	3	3	3	3	3	1	1	3	3	2	2
718	CC363	0	0	1	2	3	3	1	3	1	3	1	3	1	3	1	3	2	3
719	CC364	0	0	2	2	3	3	3	3	3	3	3	3	1	1	3	3	2	2
720	CC365	0	0	2	2	3	3	1	3	1	3	3	3	1	3	3	3	2	3
721	CC366	0	0	2	2	3	3	1	3	1	3	3	3	1	3	1	3	2	3
722	CC367	0	0	1	2	1	3	1	3	1	3	3	3	1	3	3	3	2	3
723	CC368	0	0	1	2	3	3	3	3	3	3	3	3	1	1	3	3	2	2
724	CC369	0	0	2	2	3	3	3	3	3	3	3	3	1	1	3	3	2	2
725	CC370	0	0	1	2	3	3	3	3	3	3	3	3	1	1	3	3	2	2
726	CC371	0	0	1	2	1	3	3	3	3	3	1	3	1	1	1	3	2	2
727	CC372	0	0	2	2	1	3	1	3	1	3	3	3	1	3	3	3	2	3
728	CC373	0	0	2	2	3	3	3	3	3	3	3	3	1	1	3	3	2	3
729	CC374	0	0	2	2	3	3	3	3	3	3	3	3	1	1	3	3	2	2
730	CC375	0	0	1	2	3	3	3	3	3	3	3	3	1	1	3	3	2	2
731	CC376	0	0	1	2	3	3	1	3	1	3	1	3	1	3	1	3	2	3
732	CC377	0	0	1	2	3	3	3	3	3	3	3	3	1	1	3	3	2	2
733	CC378	0	0	1	2	3	3	3	3	3	3	3	3	1	1	3	3	2	3
734	CC379	0	0	2	2	3	3	3	3	3	3	3	3	1	1	3	3	2	3
735	CC380	0	0	2	2	3	3	3	3	3	3	3	3	1	1	3	3	2	2
736	CC381	0	0	2	2	3	3	3	3	3	3	3	3	1	1	3	3	2	2
737	CC382	0	0	2	2	3	3	1	3	1	3	3	3	1	3	1	3	2	3
738	CC383	0	0	2	2	3	3	3	3	3	3	3	3	1	1	3	3	2	2
739	CC384	0	0	2	2	3	3	3	3	3	3	3	3	1	1	3	3	2	2
740	CC385	0	0	2	2	3	3	3	3	3	3	3	3	1	1	3	3	2	2
741	CC386	0	0	2	2	3	3	3	3	3	3	3	3	1	1	3	3	2	2
742	CC387	0	0	2	2	1	3	1	3	1	3	3	3	1	3	3	3	2	3
743	CC388	0	0	2	2	3	3	3	3	3	3	3	3	1	1	3	3	2	2
744	CC389	0	0	2	2	1	1	1	1	1	1	3	3	3	3	3	3	3	3
745	CC390	0	0	1	2	3	3	3	3	3	3	3	3	1	1	3	3	2	2
746	CC391	0	0	2	2	1	3	1	1	1	1	3	3	3	3	1	3	3	3
747	CC392	0	0	1	2	3	3	3	3	3	3	3	3	1	3	3	3	2	2
748	CC393	0	0	2	2	3	3	3	3	3	3	3	3	1	1	3	3	2	2
749	CC394	0	0	2	2	1	3	1	3	1	3	3	3	1	3	3	3	2	3
750	CC395	0	0	2	2	3	3	3	3	3	3	3	3	1	1	3	3	2	3
751	CC396	0	0	1	2	3	3	3	3	3	3	3	3	1	1	3	3	2	3
752	CC397	0	0	1	2	3	3	3	3	3	3	3	3	1	1	3	3	2	3
753	CC398	0	0	1	2	3	3	3	3	3	3	3	3	1	1	3	3	2	2
754	CC399	0	0	2	2	3	3	1	3	1	3	3	3	1	3	1	3	2	3
755	CC400	0	0	2	2	3	3	1	3	1	3	1	3	1	3	1	3	2	3
756	CC401	0	0	1	2	3	3	3	3	3	3	3	3	1	1	3	3	2	3
757	CC402	0	0	2	2	1	3	1	3	1	3	1	3	1	3	1	3	2	3
758	CC403	0	0	1	2	3	3	3	3	3	3	3	3	1	1	3	3	2	3
759	CC404	0	0	1	2	3	3	1	1	1	1	3	3	3	3	1	3	2	3
760	CC405	0	0	2	2	3	3	1	3	0	0	3	3	1	3	3	3	2	3
761	CC406	0	0	1	2	3	3	3	3	3	3	3	3	1	1	3	3	2	2
762	CC407	0	0	1	2	3	3	3	3	3	3	3	3	1	1	3	3	2	2
763	CC408	0	0	1	2	3	3	3	3	3	3	3	3	1	1	3	3	2	2
764	CC409	0	0	2	2	1	3	3	3	3	3	1	3	1	1	1	3	2	3
765	CC410	0	0	2	2	3	3	3	3	3	3	1	3	1	1	1	3	2	2
766	CC411	0	0	1	2	3	3	1	3	1	3	3	3	1	3	3	3	2	3
767	CC412	0	0	1	2	3	3	1	3	1	3	3	3	1	3	3	3	3	3
768	CC413	0	0	2	2	3	3	1	3	1	3	3	3	1	3	3	3	2	3
769	CC414	0	0	2	2	3	3	3	3	3	3	1	3	1	1	1	3	2	2
770	CC415	0	0	1	2	3	3	1	3	1	3	3	3	1	3	3	3	2	3
771	CC416	0	0	1	2	3	3	3	3	3	3	3	3	1	1	3	3	2	2
772	CC417	0	0	2	2	3	3	3	3	3	3	3	3	1	1	3	3	2	2
773	CC418	0	0	2	2	3	3	3	3	3	3	3	3	1	1	3	3	2	2
774	CC419	0	0	2	2	1	3	3	3	1	3	3	3	1	3	3	3	2	3
775	CC420	0	0	2	2	3	3	3	3	3	3	3	3	1	1	3	3	2	3
776	CC421	0	0	2	2	3	3	3	3	3	3	3	3	1	1	0	0	2	2
777	CC422	0	0	2	2	3	3	3	3	3	3	1	3	1	1	1	3	2	2
778	CC423	0	0	2	2	3	3	3	3	3	3	3	3	1	1	3	3	2	3
779	CC425	0	0	2	2	3	3	1	3	1	3	3	3	1	3	3	3	2	3
780	CC426	0	0	1	2	3	3	1	3	1	3	3	3	1	3	3	3	2	3
781	CC427	0	0	2	2	3	3	1	3	1	3	3	3	1	3	3	3	2	3
782	CC428	0	0	2	2	1	3	1	3	1	3	3	3	1	3	3	3	2	3
783	CC429	0	0	1	2	3	3	1	3	1	3	3	3	1	3	3	3	3	3
784	CC430	0	0	1	2	3	3	1	3	1	3	3	3	1	3	3	3	2	3
785	CC431	0	0	1	2	3	3	1	1	1	1	3	3	3	3	1	3	3	3
786	CC432	0	0	2	2	1	3	1	1	1	1	3	3	3	3	3	3	3	3
787	CC434	0	0	1	2	3	3	3	3	3	3	3	3	1	1	1	3	2	2
788	CC435	0	0	2	2	3	3	1	3	1	3	3	3	1	3	1	3	2	3
789	CC436	0	0	2	2	3	3	3	3	3	3	3	3	1	1	3	3	2	3
790	CC437	0	0	1	2	3	3	1	1	1	1	3	3	3	3	1	3	3	3
791	CC438	0	0	1	2	3	3	1	3	1	3	3	3	1	3	3	3	2	3
792	CC439	0	0	2	2	3	3	3	3	3	3	3	3	1	3	3	3	2	2
793	CC440	0	0	1	2	3	3	3	3	3	3	3	3	1	1	3	3	2	2
794	CC441	0	0	1	2	3	3	3	3	3	3	3	3	1	1	3	3	2	2
795	CC442	0	0	2	2	3	3	3	3	3	3	3	3	1	1	3	3	2	2
796	CC443	0	0	1	2	3	3	1	3	1	3	3	3	1	3	3	3	2	3
797	CC444	0	0	2	2	3	3	1	3	1	3	3	3	1	3	3	3	2	3
798	CC445	0	0	1	2	3	3	3	3	3	3	3	3	1	1	3	3	2	2
799	CC446	0	0	2	2	3	3	1	3	1	3	3	3	3	3	3	3	2	3
800	CC447	0	0	2	2	3	3	3	3	3	3	3	3	1	1	3	3	2	2
801	CC448	0	0	1	2	3	3	3	3	3	3	1	3	1	1	1	3	2	2
802	CC449	0	0	2	2	3	3	3	3	3	3	3	3	1	3	3	3	2	2
803	CC451	0	0	2	2	3	3	1	1	1	1	3	3	3	3	1	3	3	3
804	CC452	0	0	2	2	1	3	1	3	1	3	3	3	1	3	3	3	2	3
805	CC453	0	0	2	2	3	3	1	3	1	3	3	3	1	3	3	3	2	3
806	CC454	0	0	1	2	3	3	1	1	1	1	3	3	3	3	3	3	3	3
807	CC455	0	0	2	2	3	3	3	3	3	3	3	3	1	1	3	3	2	3
808	CC457	0	0	1	2	3	3	3	3	3	3	3	3	1	1	3	3	2	2
809	CC458	0	0	1	2	3	3	1	1	1	1	3	3	3	3	1	3	3	3
810	CC459	0	0	1	2	3	3	1	3	1	3	3	3	1	3	1	3	2	3
811	CC460	0	0	1	2	1	3	1	3	1	3	3	3	1	3	3	3	2	3
812	CC461	0	0	1	2	3	3	1	3	1	3	3	3	1	3	3	3	2	3
813	CC462	0	0	2	2	3	3	3	3	3	3	3	3	1	1	3	3	2	2
814	CC463	0	0	2	2	3	3	1	3	1	3	3	3	1	3	1	3	2	3
815	CC464	0	0	1	2	3	3	1	3	1	3	3	3	1	3	3	3	2	3
816	CC465	0	0	2	2	3	3	3	3	3	3	3	3	1	1	3	3	2	2
817	CC466	0	0	1	2	3	3	3	3	3	3	1	3	1	1	1	3	2	2
818	CC467	0	0	1	2	1	3	1	3	1	3	1	3	1	3	1	3	2	3
819	CC468	0	0	2	2	3	3	3	3	3	3	3	3	1	1	3	3	2	2
820	CC469	0	0	2	2	3	3	3	3	3	3	3	3	1	1	1	3	2	2
821	CC470	0	0	2	2	3	3	3	3	3	3	3	3	1	3	3	3	2	3
822	CC471	0	0	2	2	3	3	1	3	1	3	3	3	1	3	3	3	2	3
823	CC472	0	0	1	2	1	3	1	3	1	3	3	3	1	3	3	3	2	3
824	CC473	0	0	1	2	3	3	3	3	3	3	3	3	1	1	3	3	2	2
825	CC474	0	0	2	2	3	3	3	3	3	3	3	3	1	1	0	0	2	2
826	CC475	0	0	2	2	3	3	1	3	1	3	3	3	1	3	1	3	2	3
827	CC476	0	0	2	2	3	3	3	3	3	3	3	3	1	1	3	3	2	2
828	CC477	0	0	2	2	3	3	1	3	1	3	3	3	1	3	1	3	2	3
829	CC478	0	0	2	2	3	3	3	3	3	3	3	3	1	1	3	3	2	2
830	CC479	0	0	2	2	3	3	1	3	1	3	3	3	1	3	1	3	2	3
831	CC480	0	0	2	2	3	3	3	3	3	3	3	3	1	1	3	3	2	2
832	CC481	0	0	2	2	3	3	3	3	3	3	3	3	1	1	3	3	2	2
833	CC482	0	0	2	2	3	3	1	3	1	3	1	3	1	3	1	1	2	3
834	CC483	0	0	2	2	3	3	3	3	3	3	1	3	1	1	1	3	2	2
835	CC484	0	0	2	2	3	3	3	3	3	3	3	3	1	1	3	3	2	2
836	CC485	0	0	2	2	3	3	1	3	1	3	3	3	1	3	3	3	2	3
837	CC486	0	0	1	2	1	3	1	1	1	1	3	3	3	3	3	3	3	3
838	CC488	0	0	2	2	1	3	1	3	1	3	3	3	1	3	3	3	2	3
839	CC489	0	0	2	2	3	3	1	3	1	3	3	3	1	3	3	3	2	3
840	CC490	0	0	1	2	3	3	1	3	1	3	3	3	1	3	3	3	2	3
841	CC491	0	0	2	2	1	3	1	3	1	3	3	3	1	3	3	3	2	3
842	CC492	0	0	2	2	3	3	3	3	3	3	3	3	1	1	3	3	2	2
843	CC493	0	0	2	2	3	3	3	3	3	3	3	3	1	1	3	3	2	2
844	CC494	0	0	2	2	3	3	3	3	3	3	3	3	1	1	3	3	2	2
845	CC495	0	0	1	2	3	3	3	3	3	3	3	3	1	1	1	3	2	3
846	CC496	0	0	2	2	3	3	3	3	3	3	3	3	1	1	3	3	2	2
847	CC497	0	0	1	2	3	3	3	3	3	3	3	3	1	1	3	3	2	2
848	CC498	0	0	2	2	3	3	3	3	3	3	3	3	1	1	3	3	2	2
849	CC499	0	0	2	2	3	3	1	3	1	3	1	3	1	3	1	3	2	3
850	CC500	0	0	1	2	1	3	1	3	1	3	3	3	1	3	3	3	2	3
851	CC501	0	0	1	2	3	3	3	3	3	3	3	3	1	1	3	3	2	2
852	CC502	0	0	2	2	3	3	3	3	3	3	3	3	1	1	3	3	2	2
853	CC503	0	0	2	2	1	3	1	3	0	0	3	3	1	3	3	3	2	3
854	CC504	0	0	2	2	1	3	1	3	1	3	3	3	1	3	3	3	2	3
855	CC505	0	0	1	2	3	3	1	3	1	3	3	3	1	3	3	3	2	3
856	CC506	0	0	2	2	3	3	1	3	1	3	3	3	1	3	1	3	2	3
857	CC507	0	0	2	2	3	3	3	3	3	3	3	3	1	1	3	3	2	2
858	CC508	0	0	2	2	3	3	1	3	1	3	3	3	1	3	3	3	2	3
859	CC509	0	0	1	2	3	3	3	3	3	3	3	3	1	1	3	3	2	2
860	CC510	0	0	1	2	3	3	3	3	3	3	3	3	1	1	3	3	2	2
861	CC511	0	0	2	2	1	3	1	1	1	1	3	3	3	3	3	3	3	3
862	CC512	0	0	2	2	3	3	1	3	1	3	1	3	1	3	1	3	2	3
863	CC513	0	0	2	2	3	3	1	3	1	3	3	3	1	3	1	3	3	3
864	CC514	0	0	1	2	3	3	3	3	3	3	3	3	1	1	1	1	2	2
865	CC515	0	0	2	2	1	3	3	3	3	3	3	3	1	1	1	1	2	2
866	CC516	0	0	2	2	3	3	1	3	1	3	3	3	1	3	1	3	2	3
867	CC517	0	0	1	2	3	3	3	3	3	3	3	3	1	1	1	1	2	2
868	CC518	0	0	2	2	3	3	1	3	1	3	3	3	1	3	1	3	2	3
869	CC519	0	0	1	2	1	3	1	3	1	3	3	3	1	3	1	3	2	3
870	CC520	0	0	2	2	3	3	1	3	1	3	3	3	1	3	1	3	2	3
871	CC521	0	0	2	2	1	3	1	1	1	1	3	3	3	3	3	3	3	3
872	CC522	0	0	2	2	3	3	3	3	3	3	3	3	1	1	1	1	3	3
873	CC523	0	0	1	2	3	3	3	3	3	3	3	3	1	1	1	1	2	2
874	CC524	0	0	1	2	1	1	3	3	3	3	3	3	1	1	1	1	2	2
875	CC525	0	0	1	2	3	3	3	3	3	3	3	3	1	1	1	1	2	2
876	CC526	0	0	2	2	3	3	3	3	3	3	3	3	1	1	1	1	2	2
877	CC539	0	0	2	2	3	3	1	3	1	3	3	3	1	3	1	3	2	3
878	CC547	0	0	2	2	3	3	1	3	1	3	3	3	1	3	1	3	2	3
879	CC550	0	0	2	2	3	3	3	3	3	3	3	3	1	1	1	1	2	2
880	SA203	0	0	1	2	0	0	0	0	0	0	0	0	3	3	3	3	3	3
881	CK002	0	0	2	1	0	0	0	0	0	0	0	0	0	0	0	0	2	3
882	CK003	0	0	1	1	0	0	0	0	0	0	0	0	0	0	0	0	2	3
883	CK007	0	0	2	1	0	0	0	0	0	0	0	0	0	0	0	0	3	3
884	CK008	0	0	2	1	0	0	0	0	0	0	0	0	0	0	0	0	2	2
885	CK009	0	0	2	1	0	0	0	0	0	0	0	0	0	0	0	0	2	2
886	CK012	0	0	1	1	0	0	0	0	0	0	0	0	0	0	0	0	2	2
887	CK013	0	0	1	1	0	0	0	0	0	0	0	0	0	0	0	0	3	3
888	CK014	0	0	2	1	0	0	0	0	0	0	0	0	0	0	0	0	3	3
889	CK015	0	0	2	1	0	0	0	0	0	0	0	0	0	0	0	0	3	3
890	CK016	0	0	2	1	0	0	0	0	0	0	0	0	0	0	0	0	2	3
891	CK017	0	0	2	1	0	0	0	0	0	0	0	0	0	0	0	0	2	3
892	CK020	0	0	2	1	0	0	0	0	0	0	0	0	0	0	0	0	2	3
893	CK021	0	0	2	1	0	0	0	0	0	0	0	0	0	0	0	0	2	3
894	CK022	0	0	2	1	0	0	0	0	0	0	0	0	0	0	0	0	2	3
895	CK029	0	0	2	1	0	0	0	0	0	0	0	0	0	0	0	0	2	3
896	CK032	0	0	1	1	0	0	0	0	0	0	0	0	0	0	0	0	2	3
897	CK034	0	0	1	1	0	0	0	0	0	0	0	0	0	0	0	0	2	2
898	CK035	0	0	2	1	0	0	0	0	0	0	0	0	0	0	0	0	2	3
899	CK036	0	0	2	1	0	0	0	0	0	0	0	0	0	0	0	0	3	3
900	CK037	0	0	2	1	0	0	0	0	0	0	0	0	0	0	0	0	2	3
901	CK039	0	0	1	1	0	0	0	0	0	0	0	0	0	0	0	0	3	3
902	CK041	0	0	2	1	0	0	0	0	0	0	0	0	0	0	0	0	2	3
903	CK042	0	0	2	1	0	0	0	0	0	0	0	0	0	0	0	0	2	2
904	CK044	0	0	2	1	0	0	0	0	0	0	0	0	0	0	0	0	2	3
905	CK045	0	0	2	1	0	0	0	0	0	0	0	0	0	0	0	0	2	2
906	CK046	0	0	2	1	0	0	0	0	0	0	0	0	0	0	0	0	2	2
907	CK049	0	0	1	1	0	0	0	0	0	0	0	0	0	0	0	0	3	3
908	CK050	0	0	1	1	0	0	0	0	0	0	0	0	0	0	0	0	2	2
909	IZ157	0	0	1	1	3	3	3	3	0	0	0	0	1	1	3	3	2	2
910	IZ158	0	0	2	1	0	0	0	0	0	0	0	0	1	3	3	3	2	3
911	IZ159	0	0	2	1	0	0	0	0	0	0	0	0	1	1	1	3	2	2
912	IZ203	0	0	1	1	0	0	0	0	0	0	0	0	1	1	1	3	2	3
913	IZ204	0	0	1	1	3	3	3	3	0	0	0	0	1	1	3	3	2	2
914	IZ237	0	0	1	1	3	3	1	3	0	0	0	0	1	3	3	3	2	3
915	IZ318	0	0	1	1	1	3	1	3	1	3	0	0	1	3	3	3	2	3
916	IZ401	0	0	2	1	0	0	1	3	0	0	0	0	1	3	3	3	2	3
917	IZ402	0	0	2	1	0	0	1	3	0	0	0	0	1	3	3	3	2	3
918	IZ404	0	0	2	1	0	0	0	0	0	0	0	0	3	3	1	3	3	3
919	IZ408	0	0	2	1	0	0	1	1	0	0	0	0	3	3	1	3	3	3
920	IZ409	0	0	2	1	0	0	1	3	0	0	0	0	1	3	3	3	2	3
921	IZ410	0	0	2	1	0	0	0	0	0	0	0	0	1	1	3	3	2	2
922	IZ413	0	0	2	1	0	0	0	0	0	0	0	0	3	3	3	3	3	3
923	IZ414	0	0	2	1	0	0	1	3	0	0	0	0	1	3	3	3	2	3
924	IZ416	0	0	2	1	0	0	0	0	0	0	0	0	1	3	3	3	2	3
925	IZ417	0	0	2	1	0	0	3	3	0	0	0	0	1	1	3	3	2	2
926	IZ418	0	0	2	1	0	0	0	0	0	0	0	0	3	3	3	3	3	3
927	IZ419	0	0	1	1	0	0	3	3	0	0	0	0	1	3	1	3	2	3
928	IZ421	0	0	2	1	0	0	0	0	0	0	0	0	1	3	3	3	2	3
929	IZ422	0	0	2	1	0	0	1	3	0	0	0	0	1	3	3	3	2	3
930	IZ423	0	0	2	1	0	0	3	3	0	0	0	0	1	1	3	3	2	2
931	IZ424	0	0	2	1	0	0	0	0	0	0	0	0	3	3	3	3	3	3
932	IZ425	0	0	2	1	0	0	0	0	0	0	0	0	1	3	3	3	2	3
933	IZ426	0	0	2	1	0	0	0	0	0	0	0	0	1	3	3	3	2	3
934	IZ427	0	0	2	1	0	0	3	3	0	0	0	0	1	1	3	3	2	2
935	IZ430	0	0	2	1	0	0	0	0	0	0	0	0	3	3	3	3	3	3
936	IZ431	0	0	2	1	0	0	0	0	0	0	0	0	1	1	1	3	2	2
937	IZ432	0	0	2	1	0	0	0	0	0	0	0	0	1	3	3	3	2	3
938	IZ434	0	0	2	1	0	0	0	0	0	0	0	0	1	3	3	3	2	3
939	IZ435	0	0	1	1	0	0	0	0	0	0	0	0	1	3	3	3	2	3
940	IZ437	0	0	2	1	0	0	0	0	0	0	0	0	1	3	3	3	2	3
941	IZ440	0	0	2	1	0	0	0	0	0	0	0	0	1	3	3	3	2	3
942	IZ442	0	0	2	1	0	0	1	3	0	0	0	0	1	3	3	3	2	3
943	IZ445	0	0	2	1	0	0	0	0	0	0	0	0	1	1	3	3	2	2
944	IZ446	0	0	1	1	0	0	1	3	0	0	0	0	1	3	3	3	2	3
945	IZ447	0	0	2	1	0	0	0	0	0	0	0	0	1	3	3	3	2	3
946	IZ448	0	0	1	1	0	0	0	0	0	0	0	0	1	3	3	3	2	3
947	IZ449	0	0	1	1	0	0	0	0	0	0	0	0	1	1	3	3	2	3
948	IZ450	0	0	2	1	0	0	0	0	0	0	0	0	1	3	3	3	3	3
949	IZ454	0	0	2	1	0	0	1	3	0	0	0	0	1	3	3	3	2	3
950	IZ466	0	0	2	1	0	0	0	0	0	0	0	0	3	3	1	3	3	3
951	IZ490	0	0	1	1	0	0	0	0	0	0	0	0	1	3	3	3	2	3
952	IZ501	0	0	2	1	0	0	1	1	0	0	0	0	3	3	1	3	3	3
953	IZ503	0	0	2	1	0	0	1	3	0	0	0	0	1	3	3	3	2	3
954	IZ509	0	0	1	1	0	0	3	3	0	0	0	0	1	1	1	1	2	2
955	IZ510	0	0	2	1	0	0	1	3	0	0	0	0	1	3	3	3	2	3
956	IZ511	0	0	1	1	0	0	1	3	0	0	0	0	1	3	3	3	2	3
957	IZ512	0	0	1	1	0	0	1	1	0	0	0	0	3	3	3	3	2	3
958	IZ514	0	0	1	1	0	0	1	3	0	0	0	0	1	3	3	3	2	3
959	IZ519	0	0	2	1	0	0	3	3	0	0	0	0	1	1	3	3	2	3
960	IZ526	0	0	1	1	0	0	1	3	0	0	0	0	1	3	3	3	2	3
961	IZ527	0	0	2	1	1	3	1	3	1	3	3	3	1	3	3	3	2	3
962	IZ531	0	0	2	1	3	3	3	3	3	3	1	1	1	1	1	3	2	2
963	IZ532	0	0	1	1	0	0	3	3	0	0	0	0	1	1	3	3	2	2
964	IZ533	0	0	1	1	0	0	1	3	0	0	0	0	1	3	3	3	2	3
965	IZ534	0	0	2	1	0	0	1	3	0	0	0	0	1	3	1	3	2	3
966	IZ535	0	0	1	1	0	0	1	3	0	0	0	0	1	3	1	1	2	3
967	IZ541	0	0	1	1	0	0	1	3	0	0	0	0	1	1	3	3	2	3
968	IZ542	0	0	1	1	0	0	3	3	0	0	0	0	1	1	3	3	2	2
969	IZ543	0	0	1	1	0	0	1	3	0	0	0	0	1	3	3	3	2	3
970	IZ552	0	0	1	1	0	0	1	1	0	0	0	0	3	3	3	3	3	3
971	IZ553	0	0	1	1	1	3	1	3	1	3	3	3	1	3	3	3	3	3
972	IZ555	0	0	1	1	1	3	1	1	1	1	3	3	3	3	3	3	3	3
973	IZ557	0	0	1	1	0	0	1	3	0	0	0	0	1	3	3	3	2	3
974	IZ558	0	0	1	1	1	3	1	3	1	3	3	3	1	3	3	3	2	3
975	IZ561	0	0	2	1	3	3	3	3	3	3	3	3	1	1	3	3	2	3
976	IZ562	0	0	2	1	1	3	1	3	1	3	1	3	1	3	1	3	2	3
977	IZ564	0	0	2	1	0	0	3	3	0	0	0	0	1	1	1	3	2	2
978	IZ572	0	0	1	1	0	0	1	3	0	0	0	0	1	3	3	3	2	3
979	IZ573	0	0	2	1	0	0	1	3	0	0	0	0	1	3	3	3	2	3
980	IZ574	0	0	2	1	3	3	1	3	1	3	3	3	1	3	3	3	2	3
981	IZ576	0	0	1	1	0	0	1	3	0	0	0	0	1	3	3	3	2	3
982	IZ577	0	0	2	1	0	0	1	3	0	0	0	0	1	3	1	3	3	3
983	IZ579	0	0	2	1	0	0	1	3	0	0	0	0	1	3	3	3	2	3
984	IZ580	0	0	1	1	0	0	1	1	0	0	0	0	3	3	3	3	3	3
985	IZ583	0	0	2	1	0	0	3	3	0	0	0	0	1	1	3	3	2	2
986	IZ584	0	0	2	1	0	0	3	3	0	0	0	0	1	1	1	3	2	2
987	IZ585	0	0	2	1	0	0	1	1	0	0	0	0	3	3	3	3	3	3
988	IZ586	0	0	2	1	0	0	1	3	0	0	0	0	1	3	3	3	2	3
989	IZ587	0	0	2	1	0	0	1	3	0	0	0	0	1	3	3	3	2	3
990	IZ589	0	0	2	1	0	0	1	3	0	0	0	0	1	3	3	3	2	3
991	IZ590	0	0	2	1	0	0	3	3	0	0	0	0	1	1	3	3	2	2
992	IZ591	0	0	1	1	0	0	1	3	0	0	0	0	1	3	1	3	2	3
993	IZ592	0	0	1	1	0	0	3	3	0	0	0	0	1	1	3	3	2	2
994	IZ593	0	0	2	1	0	0	1	3	0	0	0	0	1	3	3	3	2	3
995	IZ594	0	0	2	1	0	0	1	3	0	0	0	0	3	3	3	3	3	3
996	IZ595	0	0	1	1	0	0	1	3	0	0	0	0	1	3	3	3	2	3
997	IZ597	0	0	2	1	1	3	1	3	1	3	1	3	1	3	3	3	2	3
998	IZ600	0	0	2	1	1	1	1	1	1	1	3	3	3	3	3	3	3	3
999	IZ605	0	0	2	1	0	0	1	3	0	0	0	0	1	3	3	3	2	3
1000	IZ606	0	0	1	1	0	0	1	3	0	0	0	0	1	3	3	3	2	3
1001	IZ607	0	0	1	1	0	0	1	3	0	0	0	0	1	3	3	3	2	2
1002	IZ608	0	0	1	1	0	0	3	3	0	0	0	0	1	1	3	3	2	2
1003	IZ609	0	0	1	1	1	3	1	1	1	1	3	3	3	3	3	3	3	3
1004	IZ610	0	0	1	1	0	0	3	3	0	0	0	0	1	1	3	3	2	3
1005	IZ611	0	0	2	1	1	3	1	1	1	1	3	3	3	3	3	3	3	3
1006	IZ615	0	0	2	1	1	3	1	3	1	3	3	3	1	3	3	3	2	3
1007	IZ617	0	0	2	1	0	0	1	3	0	0	0	0	1	3	3	3	2	3
1008	IZ619	0	0	1	1	1	3	1	3	1	3	3	3	1	3	3	3	2	3
1009	IZ620	0	0	2	1	3	3	3	3	3	3	3	3	1	1	3	3	2	2
1010	IZ626	0	0	2	1	3	3	3	3	3	3	3	3	1	1	3	3	2	2
1011	IZ628	0	0	2	1	0	0	3	3	0	0	0	0	1	1	3	3	2	2
1012	IZ629	0	0	1	1	3	3	3	3	3	3	3	3	1	1	3	3	2	2
1013	IZ630	0	0	2	1	3	3	1	3	1	3	3	3	1	3	3	3	2	3
1014	IZ642	0	0	1	1	0	0	1	3	0	0	0	0	1	3	3	3	2	3
1015	IZ643	0	0	1	1	0	0	1	3	0	0	0	0	1	3	3	3	2	3
1016	IZ644	0	0	2	1	3	3	3	3	3	3	3	3	1	1	3	3	2	2
1017	IZ647	0	0	2	1	0	0	1	3	0	0	0	0	1	3	1	3	3	3
1018	IZ650	0	0	2	1	3	3	3	3	0	0	3	3	1	1	3	3	2	2
1019	IZ651	0	0	2	1	1	3	1	1	1	1	3	3	3	3	3	3	3	3
1020	IZ652	0	0	2	1	1	3	1	3	1	3	3	3	1	3	3	3	2	3
1021	IZ654	0	0	2	1	1	1	1	1	0	0	3	3	3	3	3	3	3	3
1022	IZ655	0	0	2	1	0	0	1	3	0	0	0	0	1	3	3	3	2	3
1023	IZ656	0	0	2	1	0	0	1	3	0	0	0	0	1	3	1	3	2	3
1024	IZ664	0	0	2	1	0	0	1	1	1	1	3	3	3	3	1	3	3	3
1025	IZ668	0	0	2	1	0	0	3	3	0	0	0	0	1	1	3	3	2	2
1026	IZ671	0	0	2	1	0	0	1	3	0	0	0	0	1	3	3	3	2	3
1027	IZ676	0	0	2	1	0	0	1	1	0	0	0	0	3	3	3	3	3	3
1028	IZ679	0	0	1	1	0	0	3	3	0	0	0	0	1	1	3	3	2	2
1029	IZ682	0	0	1	1	3	3	1	3	0	0	3	3	1	3	3	3	2	3
1030	IZ686	0	0	1	1	3	3	3	3	3	3	3	3	1	1	3	3	2	2
1031	IZ688	0	0	2	1	0	0	3	3	0	0	0	0	1	1	1	3	2	2
1032	IZ689	0	0	2	1	0	0	3	3	0	0	0	0	1	1	1	3	2	2
1033	IZ713	0	0	1	1	1	3	1	3	1	3	3	3	1	3	3	3	2	3
1034	IZ714	0	0	2	1	0	0	1	3	0	0	0	0	1	3	3	3	2	3
1035	IZ717	0	0	2	1	0	0	1	3	0	0	0	0	1	3	3	3	2	3
1036	IZ718	0	0	2	1	0	0	1	1	0	0	0	0	3	3	3	3	3	3
1037	IZ724	0	0	2	1	0	0	1	3	0	0	0	0	1	3	3	3	2	3
1038	IZ731	0	0	2	1	0	0	1	3	0	0	0	0	1	3	3	3	2	3
1039	IZ735	0	0	1	1	0	0	1	3	0	0	0	0	1	3	3	3	2	3
1040	IZ739	0	0	2	1	0	0	1	1	0	0	0	0	3	3	3	3	3	3
1041	IZ742	0	0	1	1	0	0	3	3	0	0	0	0	1	1	3	3	2	2
1042	IZ757	0	0	2	1	0	0	3	3	0	0	0	0	1	1	3	3	2	2
1043	IZ758	0	0	2	1	0	0	1	1	0	0	0	0	3	3	3	3	3	3
1044	IZ760	0	0	1	1	3	3	3	3	3	3	3	3	1	1	3	3	2	2
1045	IZ761	0	0	2	1	0	0	3	3	0	0	0	0	1	1	3	3	2	2
1046	IZ762	0	0	2	1	3	3	3	3	3	3	3	3	1	1	3	3	2	2
1047	IZ763	0	0	1	1	0	0	1	3	0	0	0	0	1	3	3	3	2	3
1048	IZ767	0	0	2	1	3	3	1	3	1	3	3	3	1	3	3	3	2	3
1049	IZ768	0	0	2	1	0	0	3	3	0	0	0	0	1	1	3	3	2	3
1050	IZ770	0	0	1	1	0	0	1	3	0	0	0	0	3	3	3	3	3	3
1051	IZ771	0	0	1	1	0	0	3	3	0	0	0	0	1	1	3	3	2	2
1052	IZ772	0	0	1	1	0	0	3	3	0	0	0	0	1	1	3	3	2	2
1053	IZ773	0	0	2	1	0	0	1	1	0	0	0	0	3	3	3	3	3	3
1054	IZ774	0	0	1	1	0	0	3	3	0	0	0	0	1	1	3	3	2	2
1055	IZ776	0	0	2	1	0	0	3	3	0	0	0	0	1	1	3	3	2	2
1056	IZ777	0	0	2	1	0	0	1	1	0	0	0	0	3	3	3	3	3	3
1057	IZ779	0	0	2	1	0	0	1	3	0	0	0	0	1	3	3	3	2	3
1058	IZ780	0	0	2	1	0	0	1	3	0	0	0	0	1	3	1	3	2	3
1059	IZ781	0	0	1	1	0	0	1	3	0	0	0	0	1	3	3	3	2	3
1060	IZ782	0	0	2	1	0	0	3	3	0	0	0	0	1	3	1	1	2	3
1061	IZ783	0	0	2	1	0	0	1	1	0	0	0	0	3	3	1	3	3	3
1062	IZ784	0	0	2	1	0	0	1	1	0	0	0	0	3	3	3	3	3	3
1063	IZ785	0	0	1	1	0	0	1	3	0	0	0	0	1	3	3	3	2	3
1064	IZ786	0	0	2	1	0	0	1	3	0	0	0	0	1	3	3	3	0	0
1065	IZ788	0	0	1	1	0	0	1	3	0	0	0	0	1	3	3	3	2	3
1066	IZ789	0	0	1	1	0	0	1	3	0	0	0	0	1	3	3	3	2	3
1067	IZ791	0	0	2	1	3	3	3	3	3	3	3	3	1	1	3	3	2	2
1068	IZ793	0	0	1	1	0	0	3	3	0	0	0	0	1	1	3	3	2	2
1069	IZ795	0	0	2	1	0	0	1	1	0	0	0	0	3	3	3	3	3	3
1070	IZ797	0	0	2	1	0	0	3	3	0	0	0	0	1	1	3	3	0	0
1071	IZ801	0	0	2	1	0	0	1	3	0	0	0	0	1	3	3	3	2	3
1072	IZ802	0	0	2	1	0	0	1	3	0	0	0	0	1	3	3	3	2	3
1073	IZ803	0	0	1	1	0	0	1	3	0	0	0	0	1	3	3	3	2	3
1074	IZ804	0	0	1	1	0	0	1	3	0	0	0	0	1	3	3	3	2	3
1075	IZ805	0	0	1	1	0	0	1	1	0	0	0	0	3	3	1	3	3	3
1076	IZ806	0	0	2	1	0	0	0	0	0	0	0	0	3	3	3	3	3	3
1077	IZ807	0	0	2	1	0	0	1	3	1	3	3	3	1	3	3	3	0	0
1078	IZ809	0	0	2	1	0	0	3	3	0	0	0	0	1	1	3	3	2	2
1079	IZ811	0	0	2	1	0	0	1	3	0	0	0	0	1	3	1	3	2	3
1080	IZ813	0	0	2	1	3	3	1	3	1	3	3	3	1	3	3	3	2	3
1081	IZ814	0	0	1	1	0	0	1	3	0	0	0	0	1	3	3	3	2	3
1082	IZ816	0	0	2	1	0	0	3	3	0	0	0	0	1	1	3	3	2	2
1083	IZ817	0	0	2	1	0	0	1	3	0	0	0	0	1	3	3	3	2	3
1084	IZ818	0	0	1	1	0	0	1	3	0	0	0	0	1	3	1	3	3	3
1085	IZ820	0	0	2	1	0	0	1	3	0	0	0	0	1	3	3	3	2	2
1086	IZ822	0	0	2	1	0	0	3	3	0	0	0	0	1	1	3	3	2	2
1087	IZ823	0	0	2	1	0	0	3	3	0	0	0	0	1	1	3	3	2	2
1088	IZ824	0	0	1	1	3	3	1	3	1	3	3	3	1	3	3	3	2	3
1089	IZ825	0	0	2	1	3	3	3	3	3	3	3	3	1	1	3	3	2	2
1090	IZ827	0	0	1	1	0	0	1	3	0	0	0	0	1	3	3	3	2	3
1091	IZ828	0	0	2	1	0	0	1	3	0	0	0	0	1	3	3	3	3	3
1092	IZ829	0	0	1	1	3	3	3	3	3	3	3	3	1	1	3	3	2	2
1093	IZ831	0	0	1	1	3	3	3	3	3	3	3	3	1	1	3	3	2	2
1094	IZ836	0	0	2	1	0	0	1	3	0	0	0	0	0	0	3	3	0	0
1095	IZ837	0	0	2	1	0	0	3	3	0	0	0	0	1	1	3	3	0	0
1096	IZ841	0	0	1	1	0	0	1	3	0	0	0	0	1	3	3	3	0	0
1097	IZ844	0	0	2	1	0	0	3	3	0	0	0	0	1	1	3	3	0	0
1098	IZ845	0	0	2	1	0	0	1	3	0	0	0	0	1	3	3	3	0	0
1099	IZ849	0	0	2	1	0	0	1	3	0	0	0	0	1	3	3	3	0	0
1100	IZ851	0	0	2	1	0	0	3	3	0	0	0	0	1	1	3	3	0	0
1101	IZ852	0	0	2	1	3	3	3	3	3	3	3	3	1	1	3	3	2	2
1102	IZ854	0	0	1	1	0	0	3	3	0	0	0	0	1	1	3	3	0	0
1103	IZ856	0	0	2	1	0	0	3	3	0	0	0	0	1	1	3	3	0	0
1104	IZ857	0	0	2	1	0	0	0	0	0	0	0	0	1	3	3	3	0	0
1105	IZ858	0	0	1	1	1	3	1	3	1	3	3	3	1	3	3	3	2	3
1106	IZ860	0	0	1	1	0	0	0	0	0	0	0	0	1	3	3	3	0	0
1107	IZ863	0	0	2	1	0	0	0	0	0	0	0	0	1	1	3	3	0	0
1108	IZ864	0	0	1	1	0	0	0	0	0	0	0	0	1	3	3	3	0	0
1109	IZ866	0	0	1	1	0	0	0	0	0	0	0	0	1	3	3	3	0	0
1110	IZ868	0	0	2	1	0	0	1	3	0	0	0	0	1	3	3	3	0	0
1111	IZ870	0	0	2	1	0	0	3	3	0	0	0	0	1	1	3	3	0	0
1112	IZ874	0	0	1	1	0	0	1	1	1	1	3	3	3	3	1	3	3	3
1113	IZ878	0	0	2	1	0	0	1	3	0	0	0	0	1	3	3	3	2	3
1114	IZ881	0	0	1	1	0	0	3	3	0	0	0	0	1	1	3	3	2	3
1115	IZ883	0	0	2	1	0	0	1	3	1	3	3	3	1	3	3	3	2	3
1116	IZ884	0	0	2	1	0	0	1	3	0	0	0	0	1	3	3	3	2	3
1117	IZ886	0	0	1	1	0	0	1	3	0	0	0	0	1	3	3	3	2	3
1118	IZ887	0	0	2	1	0	0	3	3	0	0	0	0	1	1	3	3	2	2
1119	IZ889	0	0	1	1	0	0	1	3	1	3	3	3	1	1	3	3	2	2
1120	IZ890	0	0	1	1	0	0	3	3	3	3	3	3	1	1	3	3	2	2
1121	IZ891	0	0	2	1	0	0	1	3	1	3	1	3	1	3	1	3	2	3
1122	IZ893	0	0	2	1	0	0	3	3	3	3	3	3	1	1	3	3	2	2
1123	IZ895	0	0	1	1	0	0	1	3	0	0	0	0	1	3	3	3	2	3
1124	IZ897	0	0	1	1	0	0	3	3	0	0	0	0	1	1	1	3	2	2
1125	IZ898	0	0	1	1	0	0	1	3	0	0	0	0	1	3	3	3	2	3
1126	IZ900	0	0	2	1	0	0	3	3	0	0	0	0	1	1	1	3	0	0
1127	IZ901	0	0	2	1	0	0	1	3	0	0	0	0	1	3	3	3	0	0
1128	IZ902	0	0	2	1	1	3	0	0	0	0	0	0	3	3	3	3	3	3
1129	IZ903	0	0	1	1	0	0	3	3	0	0	3	3	1	1	3	3	2	2
1130	IZ905	0	0	1	1	0	0	1	1	1	1	3	3	3	3	3	3	3	3
1131	IZ906	0	0	1	1	0	0	1	3	0	0	0	0	1	3	3	3	2	3
1132	IZ907	0	0	2	1	0	0	3	3	3	3	1	3	1	1	1	3	2	2
1133	IZ908	0	0	2	1	0	0	3	3	0	0	0	0	1	1	3	3	2	3
1134	IZ909	0	0	2	1	0	0	1	3	0	0	0	0	1	3	3	3	2	3
1135	IZ910	0	0	1	1	0	0	3	3	3	3	3	3	1	1	3	3	2	2
1136	IZ911	0	0	2	1	0	0	1	3	1	3	3	3	1	3	3	3	3	3
1137	IZ912	0	0	2	1	0	0	1	3	1	3	3	3	1	3	3	3	2	3
1138	IZ913	0	0	2	1	0	0	3	3	3	3	3	3	1	1	3	3	2	2
1139	IZ914	0	0	1	1	0	0	1	1	1	1	3	3	3	3	3	3	3	3
1140	IZ917	0	0	2	1	0	0	3	3	3	3	0	0	1	1	3	3	2	2
1141	IZ918	0	0	2	1	0	0	1	1	1	1	0	0	3	3	3	3	3	3
1142	IZ921	0	0	2	1	0	0	0	0	0	0	0	0	1	3	1	1	3	3
1143	IZ922	0	0	2	1	0	0	3	3	0	0	0	0	1	1	1	3	2	2
1144	IZ925	0	0	2	1	0	0	1	3	1	3	0	0	1	1	3	3	2	3
1145	IZ926	0	0	2	1	0	0	3	3	3	3	0	0	1	3	3	3	2	2
1146	IZ927	0	0	1	1	0	0	1	3	1	3	0	0	1	3	3	3	2	3
1147	IZ928	0	0	1	1	0	0	1	3	1	3	0	0	1	3	1	3	3	3
1148	IZ929	0	0	2	1	1	3	0	0	0	0	0	0	1	3	0	0	2	3
1149	IZ933	0	0	1	1	0	0	3	3	0	0	0	0	1	1	3	3	2	2
1150	IZ934	0	0	1	1	0	0	3	3	3	3	0	0	1	1	3	3	2	3
1151	IZ935	0	0	1	1	0	0	1	3	1	3	0	0	1	3	3	3	2	3
1152	IZ937	0	0	1	1	0	0	3	3	3	3	0	0	1	1	1	3	2	2
1153	IZ938	0	0	2	1	0	0	3	3	3	3	0	0	1	1	3	3	0	0
1154	IZ939	0	0	1	1	0	0	1	3	0	0	0	0	1	3	0	0	3	3
1155	IZ942	0	0	1	1	0	0	1	3	1	3	3	3	0	0	3	3	0	0
1156	NC095	0	0	2	1	0	0	0	0	0	0	0	0	0	0	0	0	2	2
1157	NC096	0	0	2	1	0	0	0	0	0	0	0	0	0	0	0	0	2	2
1158	NC097	0	0	2	1	0	0	0	0	0	0	0	0	0	0	0	0	3	3
1159	NC098	0	0	2	1	0	0	0	0	0	0	0	0	0	0	0	0	2	2
1160	NC103	0	0	2	1	0	0	0	0	0	0	0	0	1	3	3	3	2	3
1161	NC106	0	0	2	1	0	0	0	0	0	0	0	0	0	0	1	3	3	3
1162	NC114	0	0	1	1	0	0	0	0	0	0	0	0	1	3	3	3	2	3
1163	NC117	0	0	2	1	0	0	0	0	0	0	0	0	1	3	1	3	2	3
1164	NC121	0	0	2	1	0	0	0	0	0	0	0	0	0	0	0	0	2	3
1165	NC125	0	0	2	1	0	0	0	0	0	0	0	0	1	3	3	3	2	3
1166	NC131	0	0	2	1	0	0	0	0	0	0	0	0	0	0	0	0	3	3
1167	NC135	0	0	2	1	0	0	0	0	0	0	0	0	0	0	0	0	2	3
1168	NC138	0	0	2	1	0	0	0	0	0	0	0	0	0	0	0	0	2	3
1169	NC146	0	0	1	1	0	0	0	0	0	0	0	0	0	0	0	0	2	3
1170	NC148	0	0	2	1	0	0	0	0	0	0	0	0	1	1	3	3	2	2
1171	NC151	0	0	2	1	0	0	0	0	0	0	0	0	1	1	3	3	2	3
1172	NC159	0	0	2	1	0	0	0	0	0	0	0	0	0	0	0	0	3	3
1173	NC163	0	0	1	1	0	0	0	0	0	0	0	0	1	1	3	3	2	2
1174	NC166	0	0	2	1	0	0	0	0	0	0	0	0	1	1	3	3	2	2
1175	NC174	0	0	2	1	0	0	0	0	0	0	0	0	1	1	0	0	2	2
1176	NC177	0	0	2	1	0	0	0	0	0	0	0	0	1	1	3	3	2	2
1177	NC180	0	0	2	1	0	0	0	0	0	0	0	0	0	0	0	0	3	3
1178	NC183	0	0	1	1	0	0	0	0	0	0	0	0	3	3	3	3	3	3
1179	NC189	0	0	1	1	0	0	0	0	0	0	0	0	1	3	1	3	2	3
1180	NC190	0	0	1	1	0	0	0	0	0	0	0	0	1	3	3	3	2	3
1181	NC191	0	0	2	1	0	0	0	0	0	0	0	0	1	3	3	3	2	3
1182	NC192	0	0	2	1	0	0	0	0	0	0	0	0	1	3	3	3	2	3
1183	NC195	0	0	1	1	0	0	0	0	0	0	0	0	0	0	0	0	2	3
1184	NC196	0	0	2	1	0	0	0	0	0	0	0	0	1	3	0	0	2	3
1185	NC199	0	0	2	1	0	0	0	0	0	0	0	0	0	0	0	0	2	2
1186	NC201	0	0	2	1	0	0	0	0	0	0	0	0	1	3	3	3	3	3
1187	NC205	0	0	2	1	0	0	0	0	0	0	0	0	3	3	3	3	3	3
1188	NC207	0	0	1	1	0	0	0	0	0	0	0	0	1	3	1	3	2	3
1189	NC210	0	0	1	1	0	0	0	0	0	0	0	0	1	3	3	3	2	3
1190	NC215	0	0	2	1	0	0	0	0	0	0	0	0	1	3	3	3	2	3
1191	NC216	0	0	2	1	0	0	0	0	0	0	0	0	1	1	3	3	2	2
1192	NC227	0	0	2	1	0	0	0	0	0	0	0	0	1	1	3	3	2	2
1193	NC229	0	0	2	1	0	0	0	0	0	0	0	0	1	3	3	3	2	3
1194	NC232	0	0	1	1	0	0	0	0	0	0	0	0	0	0	0	0	2	3
1195	NC236	0	0	2	1	0	0	0	0	0	0	0	0	1	1	3	3	2	2
1196	NC240	0	0	1	1	0	0	0	0	0	0	0	0	3	3	3	3	3	3
1197	NC244	0	0	2	1	0	0	0	0	0	0	0	0	0	0	0	0	2	3
1198	NC247	0	0	2	1	0	0	0	0	0	0	0	0	0	0	0	0	2	3
1199	NC250	0	0	2	1	0	0	0	0	0	0	0	0	1	3	3	3	2	3
1200	NC254	0	0	2	1	0	0	0	0	0	0	0	0	3	3	1	3	3	3
1201	NC257	0	0	1	1	0	0	0	0	0	0	0	0	1	3	3	3	2	3
1202	NC261	0	0	1	1	0	0	0	0	0	0	0	0	0	0	0	0	2	3
1203	NC264	0	0	1	1	0	0	0	0	0	0	0	0	1	3	3	3	2	3
1204	NC268	0	0	1	1	0	0	0	0	0	0	0	0	1	3	3	3	3	3
1205	NC270	0	0	2	1	0	0	0	0	0	0	0	0	3	3	3	3	3	3
1206	NC273	0	0	2	1	0	0	0	0	0	0	0	0	3	3	3	3	3	3
1207	NC287	0	0	1	1	0	0	0	0	0	0	0	0	1	3	3	3	2	3
1208	NC306	0	0	2	1	0	0	0	0	0	0	0	0	1	3	3	3	3	3
1209	NC312	0	0	2	1	0	0	0	0	0	0	0	0	0	0	3	3	2	2
1210	NC317	0	0	1	1	0	0	0	0	0	0	0	0	0	0	0	0	2	2
1211	NC319	0	0	2	1	0	0	0	0	0	0	0	0	3	3	1	3	3	3
1212	NC329	0	0	1	1	0	0	0	0	0	0	0	0	0	0	0	0	3	3
1213	NC339	0	0	2	1	0	0	0	0	0	0	0	0	1	3	3	3	2	3
1214	NC343	0	0	2	1	0	0	0	0	0	0	0	0	1	1	3	3	2	2
1215	NC354	0	0	2	1	0	0	0	0	0	0	0	0	1	1	3	3	2	2
1216	NC367	0	0	2	1	0	0	0	0	0	0	0	0	1	1	3	3	2	2
1217	NC370	0	0	1	1	0	0	0	0	0	0	0	0	1	3	3	3	2	3
1218	NC376	0	0	2	1	0	0	0	0	0	0	0	0	1	3	3	3	2	3
1219	NC381	0	0	1	1	0	0	0	0	0	0	0	0	0	0	0	0	3	3
1220	NC385	0	0	2	1	0	0	0	0	0	0	0	0	1	1	3	3	2	2
1221	NC387	0	0	2	1	0	0	0	0	0	0	0	0	3	3	3	3	3	3
1222	NC390	0	0	2	1	0	0	0	0	0	0	0	0	0	0	0	0	2	2
1223	NC396	0	0	2	1	0	0	0	0	0	0	0	0	0	0	0	0	2	3
1224	NC399	0	0	2	1	0	0	0	0	0	0	0	0	3	3	1	3	3	3
1225	NC402	0	0	2	1	0	0	0	0	0	0	0	0	1	3	3	3	2	3
1226	NC414	0	0	2	1	0	0	0	0	0	0	0	0	0	0	0	0	2	3
1227	NC416	0	0	2	1	0	0	0	0	0	0	0	0	1	3	3	3	2	3
1228	NC419	0	0	2	1	0	0	0	0	0	0	0	0	0	0	0	0	2	3
1229	NC424	0	0	2	1	0	0	0	0	0	0	0	0	1	3	3	3	2	3
1230	NC426	0	0	2	1	0	0	0	0	0	0	0	0	1	3	3	3	2	3
1231	NC429	0	0	2	1	0	0	0	0	0	0	0	0	0	0	0	0	2	2
1232	NC430	0	0	2	1	0	0	0	0	0	0	0	0	1	3	1	3	2	3
1233	NC432	0	0	2	1	0	0	0	0	0	0	0	0	1	1	3	3	2	2
1234	NC435	0	0	2	1	0	0	0	0	0	0	0	0	1	1	3	3	2	2
1235	NC439	0	0	2	1	0	0	0	0	0	0	0	0	0	0	3	3	2	3
1236	NC441	0	0	2	1	0	0	0	0	0	0	0	0	0	0	0	0	2	3
1237	NC446	0	0	2	1	0	0	0	0	0	0	0	0	1	3	3	3	2	3
1238	NC448	0	0	2	1	0	0	0	0	0	0	0	0	0	0	0	0	2	2
1239	NC449	0	0	2	1	0	0	0	0	0	0	0	0	0	0	0	0	3	3
1240	NC467	0	0	2	1	0	0	0	0	0	0	0	0	1	1	3	3	2	2
1241	NC469	0	0	1	1	0	0	0	0	0	0	0	0	0	0	3	3	2	2
1242	NC472	0	0	1	1	0	0	0	0	0	0	0	0	1	1	3	3	2	2
1243	NC482	0	0	2	1	0	0	0	0	0	0	0	0	1	3	3	3	2	3
1244	NC484	0	0	2	1	0	0	0	0	0	0	0	0	3	3	1	3	3	3
1245	NC495	0	0	1	1	0	0	0	0	0	0	0	0	1	3	3	3	2	3
1246	NC504	0	0	2	1	0	0	0	0	0	0	0	0	0	0	0	0	2	3
1247	NC508	0	0	2	1	0	0	0	0	0	0	0	0	0	0	0	0	2	3
1248	NC517	0	0	2	1	0	0	0	0	0	0	0	0	1	3	1	3	2	3
1249	NC518	0	0	1	1	0	0	0	0	0	0	0	0	0	0	0	0	3	3
1250	NC519	0	0	1	1	0	0	0	0	0	0	0	0	0	0	0	0	2	2
1251	NC522	0	0	2	1	0	0	0	0	0	0	0	0	1	1	3	3	2	3
1252	NC526	0	0	1	1	0	0	0	0	0	0	0	0	1	1	1	3	2	2
1253	NC527	0	0	1	1	0	0	0	0	0	0	0	0	3	3	3	3	3	3
1254	NC529	0	0	1	1	0	0	0	0	0	0	0	0	0	0	0	0	2	2
1255	NC530	0	0	1	1	0	0	0	0	0	0	0	0	1	1	3	3	2	2
1256	NC531	0	0	2	1	0	0	0	0	0	0	0	0	0	0	0	0	3	3
1257	NC532	0	0	1	1	0	0	0	0	0	0	0	0	1	3	3	3	2	3
1258	NC549	0	0	2	1	0	0	0	0	0	0	0	0	0	0	0	0	2	3
1259	NC563	0	0	2	1	0	0	0	0	0	0	0	0	3	3	3	3	3	3
1260	NC564	0	0	1	1	0	0	0	0	0	0	0	0	1	3	3	3	2	3
1261	NC565	0	0	2	1	0	0	0	0	0	0	0	0	1	3	0	0	2	3
1262	NC570	0	0	2	1	0	0	0	0	0	0	0	0	0	0	0	0	2	3
1263	NC574	0	0	1	1	0	0	0	0	0	0	0	0	1	1	3	3	2	2
1264	NC584	0	0	2	1	0	0	0	0	0	0	0	0	0	0	0	0	2	3
1265	NC588	0	0	1	1	0	0	0	0	0	0	0	0	1	3	3	3	2	3
1266	NC589	0	0	2	1	0	0	0	0	0	0	0	0	0	0	0	0	2	3
1267	RC123	0	0	2	1	0	0	1	3	0	0	0	0	1	3	1	3	2	3
1268	RC128	0	0	2	1	0	0	1	1	0	0	0	0	3	3	3	3	3	3
1269	RC135	0	0	2	1	0	0	1	3	0	0	0	0	1	3	3	3	2	3
1270	RC136	0	0	2	1	0	0	1	3	0	0	0	0	1	3	3	3	2	3
1271	RC141	0	0	2	1	0	0	3	3	0	0	0	0	1	1	3	3	2	2
1272	RC142	0	0	2	1	0	0	1	1	0	0	0	0	3	3	3	3	3	3
1273	RC143	0	0	2	1	0	0	1	3	0	0	0	0	1	3	3	3	2	3
1274	RC150	0	0	2	1	0	0	1	3	0	0	0	0	1	3	1	3	2	3
1275	RC154	0	0	1	1	0	0	3	3	0	0	0	0	1	1	3	3	2	2
1276	RC155	0	0	2	1	0	0	1	3	0	0	0	0	1	3	3	3	2	3
1277	RC158	0	0	2	1	0	0	3	3	0	0	0	0	1	1	3	3	2	2
1278	RC160	0	0	1	1	0	0	1	3	0	0	0	0	1	3	3	3	2	3
1279	RC161	0	0	1	1	0	0	0	0	0	0	0	0	1	1	1	3	2	3
1280	RC162	0	0	1	1	0	0	1	1	0	0	0	0	3	3	3	3	3	3
1281	RC163	0	0	2	1	0	0	1	3	0	0	0	0	1	3	3	3	2	3
1282	RC164	0	0	1	1	0	0	3	3	0	0	0	0	1	1	3	3	2	2
1283	RC168	0	0	1	1	0	0	1	3	0	0	0	0	1	3	3	3	2	3
1284	RC190	0	0	2	1	0	0	1	3	0	0	0	0	1	3	3	3	2	3
1285	RC191	0	0	2	1	0	0	1	1	0	0	0	0	3	3	1	3	3	3
1286	RC194	0	0	1	1	0	0	1	3	0	0	0	0	1	3	3	3	2	3
1287	RC195	0	0	2	1	0	0	1	1	0	0	0	0	3	3	1	3	3	3
1288	RC196	0	0	2	1	0	0	1	3	0	0	0	0	0	0	3	3	3	3
1289	RC199	0	0	2	1	0	0	3	3	0	0	0	0	1	1	3	3	2	2
1290	RC200	0	0	2	1	0	0	3	3	0	0	0	0	1	1	3	3	2	2
1291	RC201	0	0	2	1	0	0	1	3	0	0	0	0	1	3	3	3	2	3
1292	RC202	0	0	2	1	0	0	1	3	0	0	0	0	1	3	1	3	2	3
1293	RC203	0	0	2	1	0	0	1	3	0	0	0	0	1	3	3	3	2	3
1294	RC214	0	0	2	1	0	0	1	3	0	0	0	0	1	3	3	3	2	3
1295	RC215	0	0	2	1	0	0	1	1	0	0	0	0	3	3	3	3	3	3
1296	RC222	0	0	1	1	0	0	0	0	0	0	0	0	1	3	1	3	2	3
1297	RC229	0	0	1	1	0	0	1	3	0	0	0	0	1	3	3	3	2	3
1298	RC238	0	0	2	1	0	0	3	3	0	0	0	0	1	1	3	3	2	2
1299	RC243	0	0	1	1	0	0	3	3	0	0	0	0	1	1	3	3	2	2
1300	RC244	0	0	1	1	0	0	1	3	0	0	0	0	1	3	3	3	2	3
1301	RC245	0	0	1	1	0	0	1	3	0	0	0	0	1	3	3	3	2	3
1302	RC246	0	0	1	1	0	0	3	3	0	0	0	0	1	1	3	3	2	2
1303	RC249	0	0	1	1	0	0	1	3	0	0	0	0	1	3	3	3	2	3
1304	RC253	0	0	2	1	0	0	1	3	0	0	0	0	1	3	3	3	2	3
1305	RC254	0	0	1	1	0	0	1	3	0	0	0	0	1	3	3	3	2	3
1306	RC258	0	0	2	1	0	0	1	3	0	0	0	0	3	3	3	3	3	3
1307	RC261	0	0	2	1	0	0	1	3	0	0	0	0	1	3	3	3	2	3
1308	RC266	0	0	1	1	0	0	1	3	0	0	0	0	1	3	3	3	2	3
1309	RC268	0	0	1	1	0	0	1	3	0	0	0	0	1	3	1	3	2	3
1310	RC274	0	0	1	1	0	0	3	3	0	0	0	0	1	1	3	3	2	2
1311	RC278	0	0	1	1	0	0	3	3	0	0	0	0	1	1	3	3	2	2
1312	RC279	0	0	1	1	0	0	3	3	0	0	0	0	1	1	1	3	2	2
1313	RC282	0	0	1	1	0	0	0	0	0	0	0	0	1	3	3	3	2	3
1314	RC286	0	0	1	1	0	0	0	0	0	0	0	0	1	3	3	3	2	3
1315	RC287	0	0	2	1	0	0	0	0	0	0	0	0	1	3	3	3	2	3
1316	RC288	0	0	1	1	0	0	0	0	0	0	0	0	3	3	3	3	3	3
1317	RC291	0	0	2	1	0	0	0	0	0	0	0	0	1	1	3	3	2	2
1318	RC293	0	0	1	1	0	0	0	0	0	0	0	0	3	3	3	3	3	3
1319	RC300	0	0	1	1	0	0	0	0	0	0	0	0	1	3	3	3	2	3
1320	RC311	0	0	1	1	0	0	0	0	0	0	0	0	1	3	1	3	2	3
1321	RC318	0	0	1	1	0	0	0	0	0	0	0	0	3	3	3	3	3	3
1322	RC319	0	0	1	1	0	0	0	0	0	0	0	0	1	3	3	3	3	3
1323	RC322	0	0	1	1	0	0	0	0	0	0	0	0	1	1	3	3	2	2
1324	RC323	0	0	1	1	0	0	0	0	0	0	0	0	1	1	3	3	2	2
1325	RC336	0	0	1	1	0	0	0	0	0	0	0	0	1	1	3	3	2	2
1326	RC343	0	0	1	1	0	0	0	0	0	0	0	0	1	1	3	3	2	2
1327	RC344	0	0	1	1	0	0	0	0	0	0	0	0	1	3	3	3	2	3
1328	RC348	0	0	1	1	0	0	0	0	0	0	0	0	1	3	1	3	2	3
1329	RC351	0	0	1	1	0	0	0	0	0	0	0	0	1	1	3	3	2	2
1330	RC356	0	0	1	1	0	0	0	0	0	0	0	0	1	1	3	3	2	2
1331	RC362	0	0	1	1	0	0	0	0	0	0	0	0	1	3	3	3	2	3
1332	RC363	0	0	1	1	0	0	0	0	0	0	0	0	1	1	3	3	2	2
1333	RC366	0	0	1	1	0	0	0	0	0	0	0	0	3	3	1	3	3	3
1334	RC369	0	0	1	1	0	0	0	0	0	0	0	0	1	1	3	3	2	2
1335	RC370	0	0	1	1	0	0	0	0	0	0	0	0	1	1	3	3	2	2
1336	RC372	0	0	1	1	0	0	0	0	0	0	0	0	1	3	3	3	2	3
1337	RC374	0	0	1	1	0	0	0	0	0	0	0	0	3	3	1	3	3	3
1338	RC376	0	0	1	1	0	0	0	0	0	0	0	0	1	1	3	3	2	2
1339	RC379	0	0	1	1	0	0	0	0	0	0	0	0	1	3	1	3	2	3
1340	RC380	0	0	1	1	0	0	0	0	0	0	0	0	1	1	3	3	2	2
1341	RC381	0	0	2	1	0	0	0	0	0	0	0	0	1	3	3	3	2	3
1342	RC385	0	0	1	1	0	0	0	0	0	0	0	0	1	1	3	3	2	2
1343	RC391	0	0	2	1	0	0	3	3	0	0	0	0	1	1	3	3	2	2
1344	RC394	0	0	1	1	0	0	3	3	0	0	0	0	1	1	3	3	2	2
1345	RC396	0	0	1	1	0	0	1	1	0	0	0	0	3	3	1	3	3	3
1346	RC401	0	0	1	1	0	0	3	3	0	0	0	0	1	1	3	3	2	2
1347	RC408	0	0	1	1	0	0	1	1	0	0	0	0	3	3	3	3	3	3
1348	RC410	0	0	2	1	0	0	1	3	0	0	0	0	1	3	3	3	2	3
1349	RC414	0	0	1	1	0	0	1	1	0	0	0	0	3	3	3	3	3	3
1350	RC416	0	0	2	1	0	0	1	3	0	0	0	0	1	3	3	3	2	3
1351	RC422	0	0	1	1	0	0	3	3	0	0	0	0	1	1	3	3	2	2
1352	RC423	0	0	1	1	0	0	3	3	0	0	0	0	1	1	3	3	2	2
1353	RC427	0	0	1	1	0	0	3	3	0	0	0	0	1	1	3	3	2	2
1354	RC428	0	0	1	1	0	0	3	3	0	0	0	0	1	1	3	3	2	2
1355	RC431	0	0	1	1	0	0	0	0	0	0	0	0	1	3	3	3	2	3
1356	RC435	0	0	1	1	0	0	3	3	0	0	0	0	1	1	1	3	2	2
1357	RC437	0	0	1	1	0	0	1	3	0	0	0	0	1	3	3	3	2	3
1358	SA102	0	0	2	1	3	3	1	3	1	3	3	3	1	3	3	3	2	3
1359	SA103	0	0	2	1	3	3	3	3	3	3	3	3	1	1	3	3	2	2
1360	SA106	0	0	2	1	1	1	1	1	1	1	3	3	3	3	3	3	3	3
1361	SA107	0	0	2	1	1	1	1	1	1	1	3	3	3	3	3	3	3	3
1362	SA108	0	0	1	1	3	3	3	3	3	3	3	3	1	1	3	3	2	2
1363	SA109	0	0	1	1	3	3	1	3	1	3	3	3	1	3	3	3	2	3
1364	SA110	0	0	1	1	3	3	3	3	3	3	3	3	1	1	3	3	2	2
1365	SA111	0	0	2	1	3	3	3	3	3	3	3	3	1	1	3	3	2	2
1366	SA113	0	0	1	1	1	3	1	3	1	3	3	3	1	3	3	3	2	3
1367	SA114	0	0	1	1	1	3	1	3	1	3	3	3	1	3	3	3	3	3
1368	SA115	0	0	1	1	3	3	3	3	3	3	3	3	1	1	3	3	2	2
1369	SA116	0	0	2	1	1	3	1	3	1	3	3	3	1	3	3	3	2	3
1370	SA117	0	0	2	1	3	3	3	3	3	3	3	3	1	1	3	3	2	2
1371	SA118	0	0	2	1	3	3	3	3	3	3	3	3	1	1	3	3	2	3
1372	SA121	0	0	1	1	3	3	3	3	3	3	3	3	1	1	3	3	2	2
1373	SA122	0	0	1	1	1	3	1	3	1	3	3	3	3	3	3	3	3	3
1374	SA123	0	0	1	1	3	3	1	3	1	3	3	3	1	3	3	3	2	3
1375	SA124	0	0	1	1	3	3	1	3	1	3	3	3	1	3	3	3	3	3
1376	SA125	0	0	2	1	1	3	1	3	1	3	3	3	1	3	3	3	2	3
1377	SA126	0	0	2	1	3	3	3	3	3	3	3	3	1	1	3	3	2	2
1378	SA127	0	0	2	1	3	3	3	3	3	3	3	3	1	1	3	3	2	2
1379	SA128	0	0	2	1	3	3	3	3	3	3	3	3	1	1	3	3	2	2
1380	SA129	0	0	1	1	3	3	1	3	1	3	3	3	1	3	3	3	2	3
1381	SA130	0	0	1	1	3	3	3	3	3	3	3	3	1	1	3	3	2	2
1382	SA131	0	0	1	1	3	3	1	1	1	1	3	3	3	3	1	3	3	3
1383	SA132	0	0	1	1	3	3	1	1	1	1	3	3	3	3	1	3	3	3
1384	SA133	0	0	1	1	3	3	3	3	3	3	3	3	1	1	3	3	2	2
1385	SA134	0	0	2	1	1	3	1	1	1	1	3	3	3	3	3	3	3	3
1386	SA135	0	0	1	1	3	3	1	3	1	3	3	3	1	3	3	3	2	3
1387	SA136	0	0	2	1	3	3	1	1	1	1	3	3	3	3	3	3	3	3
1388	SA137	0	0	1	1	1	3	3	3	3	3	1	3	1	1	1	3	2	2
1389	SA138	0	0	2	1	3	3	3	3	3	3	3	3	1	1	3	3	2	2
1390	SA139	0	0	1	1	3	3	3	3	3	3	3	3	1	1	3	3	2	2
1391	SA140	0	0	1	1	1	3	1	1	1	1	3	3	3	3	3	3	3	3
1392	SA141	0	0	1	1	1	3	1	1	1	1	3	3	3	3	3	3	3	3
1393	SA142	0	0	2	1	1	3	1	1	1	1	3	3	3	3	3	3	3	3
1394	SA143	0	0	2	1	1	3	1	3	1	3	3	3	3	3	3	3	3	3
1395	SA144	0	0	2	1	3	3	3	3	3	3	3	3	1	1	3	3	2	2
1396	SA148	0	0	2	1	3	3	1	3	1	3	3	3	1	3	3	3	2	3
1397	SA150	0	0	2	1	3	3	1	3	0	0	3	3	1	3	1	3	2	3
1398	SA151	0	0	1	1	3	3	1	3	1	3	3	3	1	3	3	3	2	3
1399	SA152	0	0	1	1	3	3	1	3	1	3	3	3	1	3	3	3	2	3
1400	SA153	0	0	2	1	3	3	1	1	1	1	3	3	3	3	1	3	3	3
1401	SA154	0	0	2	1	1	3	1	3	1	3	3	3	1	3	3	3	2	3
1402	SA155	0	0	2	1	3	3	1	3	1	3	3	3	1	3	3	3	2	3
1403	SA156	0	0	1	1	3	3	1	3	1	3	3	3	1	3	3	3	2	3
1404	SA157	0	0	1	1	3	3	3	3	3	3	1	3	1	1	3	3	2	2
1405	SA158	0	0	1	1	1	1	1	1	1	1	3	3	3	3	3	3	3	3
1406	SA159	0	0	2	1	3	3	1	3	1	3	3	3	1	3	1	3	2	3
1407	SA160	0	0	2	1	3	3	3	3	3	3	3	3	1	1	3	3	2	2
1408	SA161	0	0	2	1	1	3	1	3	1	3	3	3	1	3	3	3	2	3
1409	SA162	0	0	1	1	1	3	1	3	1	3	3	3	1	3	3	3	3	3
1410	SA163	0	0	2	1	3	3	1	3	1	3	3	3	1	3	1	3	2	3
1411	SA164	0	0	1	1	1	3	1	3	1	3	3	3	1	3	3	3	2	3
1412	SA165	0	0	1	1	3	3	1	3	1	3	3	3	1	3	3	3	2	3
1413	SA166	0	0	2	1	3	3	1	3	1	3	3	3	1	3	3	3	2	3
1414	SA167	0	0	1	1	3	3	1	1	1	1	3	3	3	3	3	3	3	3
1415	SA168	0	0	1	1	1	3	1	3	1	3	3	3	3	3	1	3	3	3
1416	SA169	0	0	1	1	3	3	3	3	3	3	3	3	1	1	3	3	2	2
1417	SA171	0	0	1	1	1	3	1	1	1	1	3	3	3	3	3	3	3	3
1418	SA172	0	0	1	1	3	3	3	3	3	3	3	3	1	1	3	3	2	2
1419	SA173	0	0	1	1	1	1	1	3	0	0	3	3	1	3	3	3	2	3
1420	SA174	0	0	1	1	3	3	3	3	3	3	1	3	1	1	1	3	2	2
1421	SA175	0	0	2	1	3	3	1	1	1	1	3	3	3	3	1	3	3	3
1422	SA176	0	0	1	1	3	3	1	3	1	3	3	3	1	3	3	3	2	3
1423	SA177	0	0	2	1	3	3	3	3	3	3	3	3	1	1	3	3	2	2
1424	SA178	0	0	1	1	3	3	1	1	1	1	3	3	3	3	3	3	3	3
1425	SA179	0	0	2	1	3	3	1	3	1	3	3	3	1	3	3	3	2	3
1426	SA180	0	0	2	1	1	3	1	3	1	3	3	3	1	3	3	3	2	3
1427	SA181	0	0	2	1	3	3	1	3	1	3	3	3	1	3	3	3	2	3
1428	SA182	0	0	2	1	1	3	1	3	1	3	3	3	1	3	3	3	2	3
1429	SA183	0	0	1	1	3	3	3	3	3	3	3	3	1	1	3	3	2	3
1430	SA185	0	0	1	1	3	3	1	3	1	3	3	3	1	3	3	3	2	3
1431	SA186	0	0	1	1	3	3	3	3	3	3	3	3	1	1	3	3	2	2
1432	SA187	0	0	1	1	1	3	1	1	1	1	3	3	3	3	3	3	3	3
1433	SA188	0	0	2	1	3	3	3	3	3	3	3	3	1	1	3	3	2	2
1434	SA194	0	0	1	1	3	3	3	3	3	3	3	3	1	1	3	3	2	2
1435	SA195	0	0	1	1	1	3	1	3	1	3	3	3	1	3	3	3	2	3
1436	SA196	0	0	1	1	1	3	1	3	1	3	3	3	1	3	3	3	2	3
1437	SA199	0	0	2	1	3	3	1	1	1	1	3	3	3	3	3	3	3	3
1438	SA200	0	0	1	1	1	3	1	1	1	1	3	3	3	3	3	3	3	3
1439	SA201	0	0	1	1	3	3	3	3	3	3	3	3	1	1	3	3	2	2
1440	SA202	0	0	1	1	3	3	3	3	3	3	3	3	1	1	3	3	2	2
1441	SA204	0	0	1	1	3	3	1	3	1	3	3	3	1	3	3	3	2	3
1442	SA205	0	0	2	1	3	3	3	3	3	3	3	3	1	1	3	3	2	2
1443	SA206	0	0	2	1	3	3	1	3	1	3	3	3	1	3	1	3	3	3
1444	SA207	0	0	2	1	1	3	3	3	3	3	1	3	1	1	1	3	2	2
1445	SA208	0	0	2	1	3	3	1	1	1	1	3	3	3	3	1	3	3	3
1446	SA209	0	0	2	1	1	3	1	3	1	3	3	3	1	3	3	3	2	3
1447	SA210	0	0	2	1	1	3	3	3	3	3	1	3	1	1	0	0	2	2
1448	SA211	0	0	2	1	1	3	1	3	1	3	3	3	1	3	3	3	2	3
1449	SA212	0	0	2	1	3	3	1	3	1	3	3	3	1	3	3	3	2	3
1450	SA213	0	0	2	1	3	3	1	3	1	3	3	3	1	3	0	0	2	3
1451	SA215	0	0	2	1	1	3	1	3	1	3	3	3	1	3	3	3	2	3
1452	SA216	0	0	2	1	1	3	1	3	1	3	1	3	1	3	1	3	2	3
1453	SA218	0	0	1	1	3	3	3	3	3	3	3	3	1	1	3	3	2	3
1454	SA219	0	0	1	1	3	3	3	3	3	3	3	3	1	1	3	3	2	2
1455	SA226	0	0	1	1	1	3	1	3	0	0	3	3	1	3	3	3	2	3
1456	SA229	0	0	1	1	1	3	1	1	1	1	3	3	3	3	3	3	3	3
1457	SA230	0	0	2	1	3	3	1	1	1	1	3	3	3	3	3	3	3	3
1458	SA231	0	0	2	1	3	3	1	3	1	3	3	3	1	3	3	3	2	3
1459	SA232	0	0	1	1	1	1	1	1	1	1	3	3	3	3	3	3	3	3
1460	SA233	0	0	1	1	1	3	1	1	1	1	3	3	3	3	3	3	3	3
1461	SA234	0	0	2	1	1	3	3	3	3	3	1	3	1	1	1	3	2	2
1462	SA236	0	0	1	1	3	3	1	3	1	3	3	3	1	3	3	3	2	3
1463	SA238	0	0	2	1	3	3	3	3	3	3	3	3	1	1	3	3	2	2
1464	SA240	0	0	1	1	3	3	1	3	1	3	3	3	1	3	3	3	2	3
1465	SA242	0	0	2	1	3	3	1	1	1	1	3	3	3	3	3	3	3	3
1466	SA243	0	0	2	1	3	3	1	1	1	1	3	3	3	3	1	3	3	3
1467	SA244	0	0	1	1	3	3	1	3	1	3	3	3	1	3	3	3	2	3
1468	SA247	0	0	2	1	1	3	1	1	1	1	3	3	3	3	3	3	3	3
1469	SA248	0	0	2	1	1	3	1	3	1	3	3	3	1	3	3	3	3	3
1470	SA249	0	0	1	1	3	3	3	3	3	3	3	3	1	1	3	3	2	3
1471	SA251	0	0	2	1	3	3	1	3	1	3	3	3	1	3	3	3	2	3
1472	SA252	0	0	2	1	1	3	1	3	1	3	3	3	1	3	3	3	2	3
1473	SA253	0	0	2	1	3	3	1	1	1	1	3	3	3	3	3	3	3	3
1474	SA254	0	0	1	1	3	3	1	3	1	3	3	3	1	3	3	3	2	3
1475	SA255	0	0	2	1	3	3	3	3	3	3	3	3	1	1	3	3	2	2
1476	SA264	0	0	1	1	3	3	3	3	3	3	3	3	1	1	3	3	2	2
1477	SA267	0	0	2	1	3	3	3	3	3	3	1	3	1	1	1	3	2	2
1478	SA272	0	0	2	1	3	3	0	0	3	3	1	3	1	1	3	3	0	0
1479	SA277	0	0	2	1	3	3	3	3	3	3	3	3	1	1	3	3	2	2
1480	SA280	0	0	1	1	3	3	3	3	3	3	3	3	1	1	1	3	2	2
1481	SA281	0	0	2	1	3	3	1	3	1	3	3	3	1	3	1	3	2	3
1482	SA282	0	0	2	1	3	3	1	3	1	3	3	3	1	3	1	3	2	3
1483	SA283	0	0	2	1	3	3	3	3	3	3	3	3	1	1	3	3	2	3
1484	SA285	0	0	2	1	3	3	1	3	1	3	3	3	1	3	3	3	2	3
1485	SA286	0	0	2	1	3	3	3	3	3	3	1	3	1	1	1	3	2	2
1486	SA288	0	0	2	1	3	3	3	3	3	3	3	3	1	1	3	3	2	2
1487	SA322	0	0	1	1	3	3	1	1	1	1	3	3	3	3	3	3	3	3
1488	SA323	0	0	1	1	1	3	1	3	1	3	3	3	1	3	3	3	2	3
1489	SA325	0	0	2	1	1	3	1	3	1	3	3	3	1	3	3	3	2	3
1490	SA326	0	0	2	1	3	3	1	3	1	3	3	3	1	3	3	3	2	3
1491	SA327	0	0	2	1	3	3	1	3	1	3	3	3	1	3	1	3	2	3
1492	SA328	0	0	1	1	3	3	3	3	3	3	3	3	1	1	3	3	2	2
1493	SA329	0	0	2	1	3	3	3	3	3	3	3	3	1	1	3	3	2	2
1494	SA334	0	0	2	1	3	3	3	3	3	3	1	3	1	1	1	3	2	2
1495	SA335	0	0	2	1	3	3	3	3	3	3	3	3	1	1	3	3	2	2
1496	SA336	0	0	2	1	3	3	1	3	1	3	3	3	1	3	3	3	2	3
1497	SA338	0	0	2	1	1	3	1	3	1	3	3	3	1	3	3	3	2	3
1498	SA340	0	0	2	1	3	3	1	3	1	3	3	3	1	3	3	3	3	3
1499	SA342	0	0	1	1	3	3	1	1	1	1	3	3	3	3	1	3	3	3
1500	SA343	0	0	2	1	3	3	1	1	1	1	3	3	3	3	3	3	3	3
1501	SA344	0	0	2	1	1	3	1	3	1	3	3	3	1	3	3	3	3	3
1502	SA345	0	0	1	1	3	3	3	3	3	3	3	3	1	1	3	3	2	2
1503	SA346	0	0	2	1	3	3	1	3	1	3	1	3	1	3	1	3	2	3
1504	SA347	0	0	1	1	3	3	1	1	1	1	3	3	3	3	3	3	3	3
1505	SA350	0	0	2	1	1	3	1	3	1	3	3	3	1	3	3	3	2	3
1506	SA351	0	0	1	1	3	3	1	1	1	1	3	3	3	3	1	1	3	3
1507	SA354	0	0	2	1	3	3	3	3	3	3	3	3	1	1	3	3	2	2
1508	SA358	0	0	2	1	3	3	1	3	1	3	3	3	1	3	3	3	2	3
1509	SA501	0	0	2	1	3	3	1	3	1	3	3	3	1	3	3	3	2	3
1510	SA502	0	0	1	1	1	3	1	3	1	3	3	3	1	3	3	3	2	3
1511	SA503	0	0	1	1	3	3	3	3	3	3	3	3	1	1	3	3	2	3
1512	SA504	0	0	2	1	3	3	3	3	3	3	3	3	1	1	3	3	2	3
1513	SA505	0	0	2	1	3	3	3	3	3	3	1	3	1	1	3	3	2	2
1514	SA506	0	0	2	1	3	3	3	3	3	3	3	3	1	1	3	3	2	2
1515	SA507	0	0	2	1	3	3	3	3	3	3	1	3	1	1	3	3	2	3
1516	SA508	0	0	1	1	3	3	3	3	3	3	3	3	1	1	3	3	2	2
1517	SA509	0	0	2	1	3	3	3	3	3	3	3	3	1	1	3	3	2	2
1518	SA510	0	0	2	1	3	3	3	3	3	3	3	3	1	1	3	3	2	3
1519	SA511	0	0	2	1	3	3	1	1	1	1	3	3	3	3	3	3	3	3
1520	SA512	0	0	2	1	3	3	3	3	3	3	3	3	1	1	3	3	3	3
1521	SA513	0	0	2	1	1	3	1	3	1	3	3	3	1	3	3	3	2	3
1522	SA514	0	0	2	1	3	3	1	3	1	3	3	3	1	3	3	3	2	3
1523	SA515	0	0	2	1	3	3	1	3	1	3	3	3	1	3	3	3	2	3
1524	SA516	0	0	2	1	3	3	3	3	3	3	3	3	1	1	3	3	2	3
1525	SA517	0	0	2	1	3	3	1	3	1	3	3	3	1	3	1	3	2	3
1526	SA518	0	0	2	1	3	3	3	3	3	3	3	3	1	1	3	3	2	2
1527	SA519	0	0	2	1	3	3	3	3	3	3	3	3	1	1	3	3	2	3
1528	SA520	0	0	2	1	3	3	3	3	3	3	3	3	1	1	3	3	2	2
1529	SA521	0	0	2	1	3	3	3	3	3	3	3	3	1	1	3	3	2	2
1530	SA522	0	0	2	1	3	3	1	3	1	3	3	3	1	3	3	3	2	3
1531	SA523	0	0	2	1	1	3	1	3	1	3	3	3	3	3	3	3	3	3
1532	SA524	0	0	2	1	3	3	3	3	3	3	3	3	1	1	3	3	2	2
1533	SA525	0	0	2	1	3	3	1	3	1	3	1	3	1	3	1	3	2	3
1534	SA526	0	0	2	1	1	3	1	1	1	1	3	3	3	3	3	3	3	3
1535	SA527	0	0	2	1	3	3	3	3	3	3	3	3	1	1	3	3	2	2
1536	SA528	0	0	2	1	1	3	1	3	1	3	3	3	1	3	3	3	2	3
1537	SA529	0	0	2	1	3	3	1	3	1	3	3	3	1	3	1	3	2	3
1538	SA530	0	0	2	1	3	3	3	3	3	3	3	3	1	1	3	3	2	2
1539	SA531	0	0	1	1	3	3	3	3	3	3	3	3	1	1	3	3	2	2
1540	SA532	0	0	2	1	1	1	1	3	1	3	1	3	1	3	1	3	2	3
1541	SA533	0	0	1	1	3	3	3	3	3	3	3	3	1	1	3	3	2	3
1542	SA534	0	0	2	1	1	1	1	1	1	1	3	3	3	3	3	3	3	3
1543	SA535	0	0	2	1	1	3	1	3	1	3	3	3	1	3	3	3	2	3
1544	SA536	0	0	2	1	3	3	3	3	3	3	3	3	1	1	3	3	2	2
1545	SA537	0	0	2	1	3	3	3	3	3	3	1	3	1	3	1	3	2	3
1546	SA538	0	0	2	1	3	3	3	3	3	3	1	3	1	1	1	3	2	2
1547	SA539	0	0	2	1	3	3	3	3	3	3	3	3	1	1	3	3	2	2
1548	SA540	0	0	2	1	1	3	1	3	1	3	3	3	1	3	3	3	2	3
1549	SA541	0	0	2	1	1	1	1	1	1	1	3	3	3	3	3	3	3	3
1550	SA542	0	0	2	1	1	3	1	3	1	3	3	3	1	3	3	3	2	3
1551	SA543	0	0	1	1	3	3	1	3	1	3	3	3	1	3	3	3	2	3
1552	SA544	0	0	2	1	3	3	3	3	3	3	3	3	1	1	3	3	2	2
1553	SA545	0	0	1	1	3	3	1	1	1	1	3	3	3	3	1	3	3	3
1554	SA546	0	0	1	1	3	3	1	3	1	3	3	3	1	3	3	3	2	3
1555	SA547	0	0	1	1	3	3	3	3	3	3	3	3	1	1	3	3	2	2
1556	SA548	0	0	1	1	1	3	1	1	1	1	3	3	3	3	3	3	3	3
1557	SA549	0	0	2	1	1	3	1	3	1	3	3	3	1	3	3	3	2	3
1558	SA550	0	0	1	1	3	3	1	3	1	3	3	3	1	3	1	3	2	3
1559	SA551	0	0	1	1	3	3	3	3	3	3	3	3	1	1	3	3	2	2
1560	SA552	0	0	1	1	3	3	3	3	3	3	3	3	1	1	3	3	2	2
1561	SA553	0	0	1	1	3	3	1	3	1	3	3	3	1	3	1	3	2	3
1562	SA554	0	0	2	1	1	3	1	3	1	3	3	3	1	3	3	3	2	3
1563	SA555	0	0	1	1	1	1	1	1	1	1	3	3	3	3	3	3	3	3
1564	SA556	0	0	1	1	1	3	1	3	1	3	3	3	3	3	3	3	3	3
1565	SA557	0	0	2	1	3	3	1	3	1	3	3	3	3	3	3	3	3	3
1566	SA558	0	0	2	1	1	1	1	1	1	1	3	3	3	3	3	3	3	3
1567	SA559	0	0	1	1	3	3	3	3	3	3	3	3	1	1	3	3	2	2
1568	SA560	0	0	2	1	3	3	3	3	3	3	3	3	1	1	3	3	2	2
1569	SA561	0	0	2	1	3	3	1	3	1	3	3	3	1	3	3	3	2	3
1570	SA562	0	0	2	1	3	3	3	3	3	3	1	3	1	1	1	3	2	2
1571	SA563	0	0	1	1	3	3	1	3	1	3	3	3	1	3	3	3	2	3
1572	SA564	0	0	2	1	1	3	1	3	1	3	3	3	1	3	3	3	2	3
1573	SA565	0	0	2	1	1	1	1	3	1	3	1	3	1	3	1	3	2	3
1574	SA566	0	0	1	1	3	3	1	3	1	3	3	3	1	3	1	3	2	3
1575	SA567	0	0	1	1	3	3	3	3	3	3	3	3	1	1	3	3	2	3
1576	SA568	0	0	1	1	3	3	3	3	3	3	3	3	1	1	3	3	2	2
1577	SA569	0	0	2	1	1	3	1	3	1	3	3	3	1	3	3	3	2	3
1578	SA570	0	0	2	1	3	3	1	3	1	3	1	3	1	3	3	3	2	3
1579	SA571	0	0	2	1	1	1	1	1	1	1	3	3	3	3	3	3	3	3
1580	SA572	0	0	1	1	3	3	1	3	1	3	3	3	1	3	3	3	2	3
1581	SA573	0	0	2	1	3	3	3	3	3	3	3	3	1	1	3	3	2	2
1582	SA574	0	0	2	1	3	3	3	3	3	3	3	3	1	1	3	3	2	2
1583	SA575	0	0	2	1	1	3	1	1	1	1	3	3	3	3	3	3	3	3
1584	SA576	0	0	1	1	1	3	1	3	1	3	3	3	1	3	3	3	2	3
1585	SA577	0	0	1	1	3	3	1	3	1	3	3	3	1	3	3	3	2	3
1586	SA578	0	0	1	1	3	3	1	3	1	3	3	3	1	3	3	3	2	3
1587	SA579	0	0	2	1	1	3	1	3	1	3	3	3	1	3	3	3	2	3
1588	SA580	0	0	2	1	3	3	1	3	1	3	3	3	1	3	1	3	2	3
1589	SA581	0	0	1	1	1	3	1	1	1	1	3	3	3	3	3	3	3	3
1590	SA582	0	0	1	1	3	3	3	3	3	3	0	0	1	1	3	3	2	2
1591	SA583	0	0	2	1	1	3	1	3	1	3	3	3	1	3	3	3	2	3
1592	SA584	0	0	2	1	3	3	1	1	1	1	3	3	3	3	1	3	3	3
1593	SA585	0	0	2	1	1	3	1	3	1	3	3	3	1	3	3	3	3	3
1594	SA586	0	0	2	1	1	3	1	3	1	3	3	3	1	3	3	3	2	3
1595	SA587	0	0	1	1	1	3	1	3	1	3	3	3	1	3	3	3	2	3
1596	SA588	0	0	2	1	3	3	1	3	1	3	3	3	1	3	3	3	2	3
1597	SA589	0	0	2	1	1	3	1	1	1	1	3	3	3	3	3	3	3	3
1598	SA590	0	0	2	1	3	3	3	3	3	3	3	3	1	1	3	3	2	2
1599	SA591	0	0	2	1	3	3	3	3	3	3	3	3	1	1	3	3	2	2
1600	SA592	0	0	2	1	3	3	3	3	3	3	3	3	1	1	3	3	2	2
1601	SA593	0	0	1	1	3	3	1	3	1	3	3	3	1	3	3	3	2	3
1602	SA594	0	0	1	1	3	3	1	3	1	3	3	3	1	3	1	3	2	3
1603	SA595	0	0	2	1	1	1	1	3	1	3	1	3	1	3	1	1	2	3
1604	SA596	0	0	1	1	3	3	1	3	1	3	3	3	1	3	3	3	2	3
1605	SA597	0	0	1	1	3	3	3	3	3	3	3	3	1	1	3	3	2	3
1606	SA598	0	0	2	1	3	3	1	1	1	1	3	3	3	3	3	3	3	3
1607	SA599	0	0	1	1	3	3	1	3	1	3	3	3	1	3	3	3	2	3
1608	SA600	0	0	2	1	3	3	3	3	3	3	3	3	1	1	3	3	2	2
1609	SA601	0	0	2	1	3	3	3	3	3	3	3	3	1	1	3	3	2	2
1610	SA602	0	0	2	1	3	3	1	3	1	3	3	3	1	3	1	3	2	3
1611	SA603	0	0	2	1	3	3	3	3	3	3	3	3	1	1	3	3	2	2
1612	SA604	0	0	2	1	3	3	1	1	1	1	3	3	3	3	3	3	3	3
1613	SA605	0	0	1	1	3	3	1	3	1	3	3	3	1	3	3	3	2	3
1614	SA606	0	0	1	1	1	1	1	1	1	1	3	3	3	3	3	3	3	3
1615	SA607	0	0	2	1	1	3	3	3	3	3	3	3	1	1	3	3	2	3
1616	SA608	0	0	1	1	1	3	1	1	1	1	3	3	3	3	3	3	3	3
1617	SA609	0	0	2	1	3	3	1	3	1	3	3	3	1	3	3	3	2	3
1618	SA610	0	0	2	1	3	3	3	3	3	3	3	3	1	1	3	3	2	2
1619	SA611	0	0	2	1	1	3	1	3	1	3	3	3	1	3	3	3	2	3
1620	SA612	0	0	2	1	3	3	1	1	1	1	3	3	3	3	3	3	3	3
1621	SA613	0	0	1	1	3	3	1	3	1	3	3	3	1	3	1	3	2	3
1622	SA614	0	0	2	1	3	3	3	3	3	3	3	3	1	1	3	3	2	2
1623	SA615	0	0	2	1	1	3	1	3	1	3	3	3	1	3	3	3	2	3
1624	SA616	0	0	1	1	3	3	3	3	3	3	3	3	1	1	3	3	2	2
1625	SA617	0	0	2	1	3	3	3	3	3	3	3	3	1	1	3	3	2	2
1626	SA618	0	0	1	1	3	3	1	1	1	1	3	3	3	3	1	3	3	3
1627	SA619	0	0	1	1	3	3	1	3	1	3	3	3	1	3	3	3	2	3
1628	SA620	0	0	2	1	3	3	3	3	3	3	3	3	1	1	3	3	2	2
1629	SA621	0	0	1	1	3	3	3	3	3	3	3	3	1	3	3	3	2	2
1630	SA622	0	0	2	1	1	3	1	3	1	3	3	3	1	3	3	3	2	3
1631	SA623	0	0	2	1	1	3	1	3	1	3	3	3	1	3	1	3	2	3
1632	SA624	0	0	2	1	1	3	1	3	1	3	3	3	1	3	3	3	2	3
1633	SA625	0	0	1	1	1	3	1	3	1	3	3	3	1	3	3	3	2	3
1634	SA626	0	0	1	1	3	3	3	3	3	3	3	3	1	1	3	3	2	2
1635	SA627	0	0	1	1	1	3	1	3	1	3	3	3	1	3	3	3	2	3
1636	SA628	0	0	2	1	3	3	3	3	3	3	3	3	1	1	3	3	2	2
1637	SA629	0	0	1	1	3	3	3	3	3	3	3	3	1	3	3	3	2	3
1638	SA630	0	0	2	1	3	3	3	3	3	3	0	0	1	1	3	3	2	2
1639	SA631	0	0	1	1	3	3	3	3	3	3	3	3	1	1	3	3	2	2
1640	SA632	0	0	1	1	3	3	3	3	3	3	3	3	1	1	3	3	2	2
1641	SA633	0	0	1	1	3	3	3	3	3	3	3	3	1	1	3	3	2	2
1642	SA634	0	0	1	1	1	3	1	3	1	3	3	3	1	3	3	3	2	3
1643	SA636	0	0	2	1	1	3	1	1	1	1	3	3	3	3	3	3	3	3
1644	SA637	0	0	1	1	3	3	3	3	3	3	3	3	1	1	3	3	2	2
1645	SA638	0	0	1	1	3	3	1	1	1	1	3	3	3	3	1	3	3	3
1646	SA639	0	0	2	1	1	3	1	3	1	3	0	0	1	3	1	3	2	3
1647	SA640	0	0	1	1	3	3	1	1	1	1	3	3	3	3	1	1	3	3
1648	SA641	0	0	1	1	1	3	1	3	1	3	3	3	1	3	3	3	2	3
1649	SA642	0	0	1	1	1	1	1	3	1	3	1	3	1	3	1	3	2	3
1650	SA643	0	0	2	1	1	3	1	3	1	3	3	3	1	3	3	3	2	3
1651	SA644	0	0	2	1	1	3	1	3	1	3	3	3	1	3	3	3	2	3
1652	SA645	0	0	1	1	1	3	1	1	1	1	3	3	3	3	3	3	3	3
1653	SA646	0	0	2	1	3	3	1	3	1	3	3	3	1	3	3	3	2	3
1654	SA647	0	0	1	1	3	3	1	3	1	3	3	3	1	3	1	3	2	3
1655	SA648	0	0	1	1	3	3	3	3	3	3	3	3	1	3	3	3	2	3
1656	SA649	0	0	2	1	3	3	1	3	1	3	3	3	1	3	3	3	2	3
1657	SA650	0	0	2	1	1	3	1	3	1	3	3	3	1	3	3	3	2	3
1658	SA651	0	0	2	1	3	3	3	3	3	3	3	3	1	1	3	3	2	3
1659	SA652	0	0	2	1	3	3	3	3	3	3	3	3	1	1	3	3	2	2
1660	SA653	0	0	1	1	1	3	1	1	1	1	3	3	3	3	1	3	3	3
1661	SA654	0	0	1	1	1	3	1	3	1	3	1	3	1	3	1	3	2	3
1662	SA655	0	0	2	1	3	3	1	3	1	3	3	3	1	3	3	3	2	3
1663	SA656	0	0	2	1	3	3	1	3	1	3	3	3	1	3	3	3	2	3
1664	SA657	0	0	2	1	3	3	3	3	3	3	3	3	1	1	3	3	2	2
1665	SA658	0	0	1	1	3	3	3	3	3	3	3	3	1	1	3	3	2	2
1666	SA659	0	0	1	1	3	3	1	3	1	3	3	3	1	3	3	3	2	3
1667	SA660	0	0	2	1	3	3	1	3	1	3	3	3	1	3	1	3	2	3
1668	SA661	0	0	2	1	1	3	1	3	1	3	3	3	1	3	3	3	2	3
1669	SA662	0	0	1	1	3	3	1	3	1	3	1	3	1	3	1	1	2	3
1670	SA663	0	0	2	1	3	3	3	3	3	3	0	0	1	1	3	3	2	2
1671	SA664	0	0	1	1	3	3	3	3	3	3	3	3	1	1	3	3	2	2
1672	SA665	0	0	1	1	3	3	1	3	1	3	3	3	1	3	3	3	3	3
1673	SA666	0	0	2	1	3	3	3	3	3	3	3	3	1	1	3	3	2	3
1674	SA667	0	0	1	1	3	3	1	3	1	3	3	3	1	3	1	3	2	3
1675	SA668	0	0	2	1	1	3	1	1	1	1	3	3	3	3	3	3	3	3
1676	SA669	0	0	1	1	3	3	3	3	3	3	3	3	1	1	3	3	2	2
1677	CK001	0	0	2	1	0	0	0	0	0	0	0	0	0	0	0	0	2	3
1678	CK004	0	0	2	1	0	0	0	0	0	0	0	0	0	0	0	0	2	3
1679	CK005	0	0	2	1	0	0	0	0	0	0	0	0	0	0	0	0	2	3
1680	CK006	0	0	2	1	0	0	0	0	0	0	0	0	0	0	0	0	2	3
1681	CK010	0	0	1	1	0	0	0	0	0	0	0	0	0	0	0	0	2	2
1682	CK011	0	0	2	1	0	0	0	0	0	0	0	0	0	0	0	0	2	2
1683	CK018	0	0	1	1	0	0	0	0	0	0	0	0	0	0	0	0	2	2
1684	CK019	0	0	2	1	0	0	0	0	0	0	0	0	0	0	0	0	2	3
1685	CK033	0	0	2	1	0	0	0	0	0	0	0	0	0	0	0	0	3	3
1686	CK038	0	0	2	1	0	0	0	0	0	0	0	0	0	0	0	0	3	3
1687	CK040	0	0	2	1	0	0	0	0	0	0	0	0	0	0	0	0	2	2
1688	CK043	0	0	1	1	0	0	0	0	0	0	0	0	0	0	0	0	2	3
1689	CK047	0	0	1	1	0	0	0	0	0	0	0	0	0	0	0	0	2	2
1690	CK048	0	0	2	1	0	0	0	0	0	0	0	0	0	0	0	0	2	3
1691	IZ439	0	0	2	1	3	3	1	3	1	3	3	3	1	3	1	3	3	3
1692	IZ560	0	0	1	1	3	3	3	3	3	3	1	3	1	1	1	3	2	3
1693	IZ563	0	0	2	1	0	0	1	3	1	3	3	3	1	3	3	3	2	3
1694	IZ566	0	0	2	1	3	3	3	3	3	3	3	3	1	1	3	3	3	3
1695	IZ622	0	0	2	1	3	3	3	3	3	3	3	3	1	1	3	3	3	3
1696	IZ624	0	0	2	1	1	3	1	3	1	3	3	3	1	3	3	3	2	3
1697	IZ625	0	0	2	1	3	3	1	3	1	3	3	3	1	3	3	3	2	3
1698	IZ631	0	0	1	1	3	3	1	1	1	1	3	3	3	3	3	3	3	3
1699	IZ872	0	0	2	1	0	0	1	1	0	0	3	3	3	3	3	3	3	3
1700	IZ892	0	0	1	1	0	0	1	3	1	3	3	3	1	3	3	3	2	3
1701	IZ924	0	0	1	1	0	0	1	3	1	3	0	0	1	3	3	3	2	3
1702	IZ940	0	0	2	1	0	0	0	0	1	1	0	0	0	0	0	0	0	0
1703	IZ941	0	0	1	1	0	0	3	3	3	3	3	3	0	0	3	3	0	0
1704	SA101	0	0	2	1	1	3	1	3	1	3	3	3	1	3	3	3	2	3
1705	SA104	0	0	2	1	3	3	3	3	3	3	3	3	1	1	3	3	2	2
1706	SA105	0	0	2	1	3	3	3	3	3	3	1	3	1	3	1	3	2	2
1707	SA112	0	0	1	1	3	3	3	3	3	3	1	3	1	1	3	3	2	2
1708	SA119	0	0	1	1	3	3	3	3	3	3	1	3	1	1	1	3	2	2
1709	SA120	0	0	2	1	3	3	1	3	1	3	3	3	1	3	1	3	2	3
1710	SA145	0	0	2	1	3	3	1	3	1	3	3	3	1	3	1	3	2	3
1711	SA147	0	0	2	1	3	3	1	3	1	3	3	3	1	3	3	3	2	3
1712	SA170	0	0	2	1	1	3	3	3	3	3	1	3	1	1	1	3	2	2
1713	SA193	0	0	1	1	3	3	3	3	3	3	3	3	1	1	3	3	2	2
1714	SA197	0	0	2	1	3	3	1	3	1	3	3	3	1	3	1	3	2	3
1715	SA237	0	0	1	1	3	3	1	3	1	3	3	3	1	3	3	3	2	3
1716	SA239	0	0	1	1	3	3	1	3	1	3	3	3	1	3	1	3	3	3
1717	SA241	0	0	1	1	1	3	1	1	1	1	3	3	3	3	3	3	3	3
1718	SA245	0	0	2	1	1	3	1	3	1	3	3	3	1	3	3	3	2	3
1719	SA246	0	0	1	1	3	3	3	3	3	3	3	3	1	1	3	3	2	2
1720	SA266	0	0	2	1	3	3	3	3	3	3	3	3	1	1	3	3	2	2
1721	SA268	0	0	2	1	1	3	1	3	1	3	3	3	1	3	3	3	2	3
1722	SA269	0	0	2	1	3	3	1	3	1	3	3	3	1	3	3	3	2	3
1723	SA270	0	0	2	1	3	3	1	3	1	3	3	3	1	3	3	3	2	3
1724	SA271	0	0	1	1	3	3	0	0	1	3	3	3	1	3	3	3	2	3
1725	SA273	0	0	2	1	3	3	1	3	1	3	3	3	1	3	3	3	2	3
1726	SA274	0	0	2	1	3	3	1	3	1	3	3	3	1	3	3	3	3	3
1727	SA276	0	0	2	1	3	3	1	3	1	3	3	3	1	3	3	3	2	3
1728	SA278	0	0	1	1	3	3	1	1	1	1	3	3	3	3	1	3	3	3
1729	SA279	0	0	2	1	1	3	1	3	1	3	3	3	1	3	3	3	2	3
1730	SA284	0	0	2	1	3	3	1	3	1	3	3	3	1	3	3	3	2	3
1731	SA287	0	0	1	1	3	3	3	3	3	3	1	3	1	1	1	3	2	2
1732	SA289	0	0	1	1	3	3	3	3	3	3	1	3	1	1	1	3	2	2
1733	SA291	0	0	1	1	3	3	3	3	3	3	3	3	1	1	3	3	2	2
1734	SA292	0	0	1	1	3	3	3	3	3	3	3	3	1	1	3	3	2	2
1735	SA295	0	0	2	1	3	3	3	3	3	3	3	3	1	1	3	3	2	2
1736	SA296	0	0	1	1	3	3	3	3	3	3	1	1	1	1	1	3	2	2
1737	SA298	0	0	2	1	3	3	1	3	1	3	3	3	1	3	3	3	2	3
1738	SA299	0	0	2	1	3	3	1	3	1	3	3	3	3	3	3	3	2	3
1739	SA300	0	0	1	1	3	3	3	3	3	3	3	3	1	1	3	3	2	2
1740	SA302	0	0	2	1	3	3	3	3	3	3	3	3	1	1	3	3	2	2
1741	SA303	0	0	2	1	3	3	1	3	1	3	3	3	3	3	3	3	3	3
1742	SA304	0	0	1	1	1	3	1	3	1	3	3	3	1	3	3	3	2	3
1743	SA306	0	0	1	1	3	3	1	3	1	3	3	3	1	3	3	3	2	3
1744	SA307	0	0	1	1	3	3	1	3	1	3	3	3	1	3	3	3	2	3
1745	SA324	0	0	2	1	1	3	1	3	1	3	3	3	1	3	3	3	3	3
1746	SA341	0	0	1	1	3	3	1	3	1	3	3	3	1	3	3	3	2	3
1747	SA348	0	0	2	1	1	3	1	3	1	3	1	3	1	3	1	3	2	3
1748	SA349	0	0	2	1	3	3	3	3	3	3	3	3	1	1	3	3	2	2
1749	SA353	0	0	1	1	3	3	1	3	1	3	3	3	1	3	3	3	2	3
1750	SA356	0	0	1	1	3	3	3	3	3	3	3	3	1	1	3	3	2	2
1751	SA357	0	0	2	1	3	3	1	3	1	3	3	3	1	3	3	3	3	3
1752	SA359	0	0	2	1	1	3	3	3	3	3	1	3	1	1	1	3	2	2
1753	SA361	0	0	2	1	1	3	1	3	1	3	3	3	1	3	3	3	2	3
1754	SA362	0	0	2	1	3	3	1	1	1	1	3	3	3	3	1	3	3	3
1755	SA363	0	0	2	1	3	3	1	3	1	3	1	3	1	3	1	3	2	3
1756	SA364	0	0	2	1	3	3	1	3	1	3	3	3	1	3	3	3	0	0
1757	SA366	0	0	2	1	1	3	3	3	3	3	1	3	1	1	1	3	2	2
1758	SA367	0	0	1	1	3	3	1	3	1	3	3	3	1	3	3	3	2	3
1759	SA374	0	0	2	1	1	3	1	3	1	3	3	3	1	3	3	3	2	3
1760	RC102	0	0	2	1	0	0	3	3	0	0	0	0	1	1	1	3	2	2
1761	RC104	0	0	1	1	0	0	3	3	0	0	0	0	1	1	3	3	2	2
1762	RC106	0	0	2	1	0	0	3	3	0	0	0	0	1	1	3	3	2	3
1763	RC140	0	0	1	1	0	0	0	0	0	0	0	0	1	3	3	3	2	3
1764	RC146	0	0	1	1	0	0	3	3	0	0	0	0	1	1	3	3	2	2
1765	RC180	0	0	2	1	0	0	1	3	0	0	0	0	1	3	3	3	2	3
1766	RC181	0	0	1	1	0	0	0	0	0	0	0	0	1	1	3	3	2	3
1767	RC204	0	0	2	1	0	0	0	0	0	0	0	0	1	3	1	3	2	3
1768	RC206	0	0	1	1	0	0	3	3	0	0	0	0	1	1	3	3	2	2
1769	RC207	0	0	1	1	0	0	1	1	0	0	0	0	3	3	1	1	3	3
1770	RC208	0	0	1	1	0	0	3	3	0	0	0	0	1	1	3	3	2	3
1771	RC209	0	0	1	1	0	0	1	3	0	0	0	0	1	3	1	3	2	3
1772	RC212	0	0	2	1	0	0	3	3	0	0	0	0	1	1	3	3	2	2
