# Supplementary material for: Micro-RNA Binding Site Polymorphisms in the WFS1 Gene Are Risk Factors of Diabetes Mellitus
Source: PLoS One. 2015 Oct 1;10(10):e0139519. doi: 10.1371/journal.pone.0139519 (PMC4591293; doi:10.1371/journal.pone.0139519)
Supplement: S4 Table — This file contains the genotype data of the combined group of patients with either type of diabetes mellitus and the control samples. (PED) [file pone.0139519.s004.ped]

5101	IZ616	0	0	1	2	3	3	3	3	3	3	3	3	1	1	3	3	2	2
5102	IZ649	0	0	2	2	3	3	3	3	3	3	3	3	1	1	3	3	2	2
5103	CC104	0	0	2	2	3	3	1	3	1	3	3	3	1	3	3	3	2	3
5104	CC106	0	0	1	2	3	3	3	3	3	3	3	3	1	1	3	3	2	2
5105	CC156	0	0	2	2	3	3	1	3	1	3	3	3	1	3	3	3	2	3
5106	CC268	0	0	2	2	3	3	3	3	3	3	3	3	1	1	3	3	2	2
5107	CC277	0	0	1	2	3	3	1	3	1	3	3	3	1	3	3	3	2	3
5108	CC278	0	0	1	2	3	3	3	3	3	3	3	3	1	1	3	3	2	2
5109	CC282	0	0	2	2	1	1	1	1	1	1	3	3	3	3	1	3	3	3
5110	CC287	0	0	2	2	3	3	3	3	1	3	1	3	1	1	3	3	2	2
5111	CC288	0	0	2	2	1	3	1	3	3	3	3	3	1	3	3	3	3	3
5112	CC289	0	0	1	2	3	3	3	3	3	3	3	3	1	1	3	3	2	2
5113	CC290	0	0	1	2	1	3	1	1	1	1	3	3	3	3	3	3	3	3
5114	CC291	0	0	1	2	3	3	3	3	3	3	3	3	1	1	3	3	2	2
5115	CC292	0	0	1	2	3	3	1	3	3	3	3	3	1	3	3	3	2	3
5116	CC293	0	0	1	2	3	3	3	3	1	3	3	3	1	1	3	3	2	2
5117	CC294	0	0	1	2	1	3	1	3	3	3	3	3	1	3	3	3	2	3
5118	CC295	0	0	1	2	3	3	1	3	3	3	3	3	1	3	1	3	2	3
5119	CC296	0	0	2	2	3	3	3	3	1	3	3	3	1	1	3	3	2	2
5120	CC297	0	0	2	2	3	3	3	3	3	3	3	3	1	1	3	3	2	2
5121	CC327	0	0	2	2	3	3	3	3	3	3	1	3	1	1	3	3	2	2
5122	CC328	0	0	1	2	3	3	1	1	1	1	3	3	3	3	3	3	3	3
5123	CC331	0	0	1	2	3	3	1	3	1	3	3	3	1	3	3	3	2	3
5124	CC335	0	0	1	2	1	3	1	1	1	1	3	3	3	3	3	3	3	3
5125	CC344	0	0	2	2	3	3	3	3	3	3	3	3	1	1	3	3	2	2
5126	CC450	0	0	1	2	3	3	1	3	1	3	3	3	1	3	1	3	2	3
5127	CC487	0	0	2	2	3	3	1	3	1	3	3	3	1	3	3	3	2	3
5128	CC527	0	0	1	2	3	3	1	1	1	1	3	3	3	3	1	3	3	3
5129	CC528	0	0	2	2	3	3	1	1	1	1	3	3	3	3	3	3	3	3
5130	CC529	0	0	1	2	1	3	3	3	3	3	3	3	1	1	1	1	2	3
5131	CC530	0	0	1	2	1	3	3	3	3	3	1	3	1	1	1	1	2	2
5132	CC531	0	0	2	2	3	3	1	3	1	3	1	3	1	1	1	1	2	2
5133	CC532	0	0	2	2	3	3	3	3	3	3	3	3	1	1	1	1	2	2
5134	CC533	0	0	1	2	3	3	1	3	1	3	3	3	1	3	1	3	2	3
5135	CC534	0	0	2	2	3	3	1	3	1	3	3	3	1	3	1	3	2	3
5136	CC535	0	0	2	2	3	3	1	3	1	3	3	3	1	1	3	3	2	2
5137	CC536	0	0	2	2	3	3	1	1	1	1	3	3	3	3	3	3	3	3
5138	CC537	0	0	1	2	3	3	1	1	1	1	3	3	1	3	1	3	2	3
5139	CC538	0	0	2	2	1	1	3	3	3	3	3	3	1	1	1	1	2	2
5140	CC540	0	0	1	2	3	3	1	3	1	3	3	3	1	3	1	3	2	3
5141	CC541	0	0	1	2	3	3	1	3	1	3	3	3	1	3	1	3	2	3
5142	CC542	0	0	2	2	3	3	1	3	1	3	3	3	1	3	1	3	2	3
5143	CC543	0	0	2	2	3	3	0	0	1	3	3	3	1	3	1	3	2	3
5144	CC544	0	0	2	2	3	3	1	1	1	1	3	3	3	3	3	3	3	3
5145	CC545	0	0	1	2	1	3	1	1	1	1	3	3	3	3	3	3	3	3
5146	CC546	0	0	1	2	3	3	3	3	3	3	3	3	1	1	1	1	2	2
5147	CC548	0	0	1	2	3	3	3	3	3	3	3	3	1	1	1	1	2	2
5148	CC549	0	0	1	2	1	3	1	3	1	3	3	3	1	3	1	3	2	3
5149	CC551	0	0	1	2	3	3	3	3	3	3	3	3	1	3	1	3	2	2
5150	CC552	0	0	1	2	1	1	1	1	1	1	3	3	3	3	3	3	3	3
5151	CC553	0	0	2	2	3	3	1	3	1	3	1	3	1	3	1	3	2	3
5152	CC554	0	0	2	2	3	3	3	3	3	3	3	3	1	1	1	1	2	2
5153	CC555	0	0	2	2	1	3	3	3	3	3	3	3	1	1	1	1	2	2
5154	CC556	0	0	1	2	3	3	3	3	3	3	3	3	1	1	1	1	2	2
5155	CC557	0	0	2	2	3	3	3	3	3	3	3	3	1	1	1	1	2	2
5156	CC558	0	0	2	2	3	3	3	3	3	3	3	3	1	1	1	1	2	2
5157	CC559	0	0	2	2	3	3	3	3	3	3	3	3	1	1	3	3	2	2
5158	CC560	0	0	2	2	3	3	1	1	1	1	3	3	3	3	3	3	3	3
5159	CC561	0	0	1	2	3	3	3	3	3	3	3	3	1	3	1	3	2	2
5160	CC562	0	0	2	2	3	3	1	3	1	3	3	3	1	3	1	3	2	3
5161	CC563	0	0	2	2	3	3	3	3	3	3	1	3	1	1	1	1	2	2
5162	CC564	0	0	1	2	3	3	1	3	1	3	3	3	1	3	1	3	2	3
5163	CC565	0	0	1	2	1	1	1	3	1	3	3	3	1	3	1	3	2	3
5164	CC566	0	0	2	2	3	3	1	1	1	1	3	3	3	3	3	3	3	3
5165	CC567	0	0	1	2	3	3	3	3	3	3	3	3	1	1	1	1	2	2
5166	CC568	0	0	1	2	1	3	1	3	1	3	3	3	1	3	1	3	2	3
5167	CC569	0	0	1	2	3	3	3	3	3	3	1	3	1	1	1	1	2	2
5168	CC570	0	0	1	2	3	3	3	3	3	3	3	3	1	1	1	1	2	3
5169	CC571	0	0	2	2	3	3	1	3	1	3	3	3	1	3	1	3	2	3
5170	CC572	0	0	2	2	0	0	1	3	1	3	3	3	1	3	1	3	2	3
5171	CC573	0	0	2	2	1	3	3	3	3	3	3	3	1	1	1	1	2	2
5172	CC575	0	0	2	2	3	3	1	3	1	3	3	3	1	3	1	3	2	3
5173	CC576	0	0	2	2	3	3	1	3	1	3	3	3	1	3	1	3	2	3
5174	CC577	0	0	1	2	1	3	3	3	3	3	3	3	1	1	1	1	2	2
5175	CC578	0	0	1	2	1	3	1	3	1	3	3	3	1	3	1	3	2	3
5176	CC579	0	0	2	2	3	3	3	3	3	3	3	3	1	1	1	1	2	2
5177	CC580	0	0	2	2	3	3	1	1	1	1	3	3	3	3	3	3	3	3
5178	CC581	0	0	1	2	3	3	1	1	1	1	3	3	3	3	3	3	3	3
5179	CC582	0	0	2	2	1	1	1	3	1	3	1	3	1	3	1	3	2	3
5180	CC583	0	0	1	2	3	3	3	3	3	3	1	3	1	1	1	1	2	2
5181	CC584	0	0	2	2	3	3	3	3	3	3	3	3	1	1	1	1	2	2
5182	CC585	0	0	2	2	3	3	3	3	3	3	3	3	1	1	1	1	2	2
5183	CC586	0	0	2	2	3	3	3	3	3	3	3	3	1	1	1	1	2	2
5184	CC587	0	0	2	2	3	3	3	3	3	3	1	3	1	1	1	1	2	2
5185	CC588	0	0	2	2	3	3	1	1	1	1	3	3	3	3	3	3	3	3
5186	CC589	0	0	2	2	3	3	1	3	1	3	3	3	1	3	1	3	2	3
5187	CC590	0	0	1	2	3	3	3	3	3	3	3	3	1	1	1	1	2	2
5188	CC591	0	0	2	2	1	3	1	3	1	3	3	3	1	3	1	3	2	3
5189	CC592	0	0	1	2	3	3	1	3	1	3	3	3	1	3	1	3	2	3
5190	CC593	0	0	1	2	3	3	3	3	3	3	3	3	1	1	1	1	2	3
5191	CC594	0	0	1	2	3	3	1	1	1	1	3	3	3	3	3	3	3	3
5192	CC595	0	0	1	2	3	3	3	3	3	3	3	3	1	1	1	1	2	2
5193	CC596	0	0	1	2	3	3	3	3	3	3	3	3	1	1	1	1	2	2
5194	CC597	0	0	1	2	1	1	1	3	1	3	3	3	1	3	1	3	2	3
5195	CC598	0	0	1	2	3	3	3	3	3	3	3	3	1	3	1	3	2	2
5196	CC599	0	0	1	2	1	3	1	3	1	3	3	3	1	3	1	3	2	3
5197	CC600	0	0	1	2	3	3	3	3	3	3	1	3	1	1	0	0	2	2
5198	CC601	0	0	1	2	3	3	3	3	3	3	3	3	1	1	0	0	2	2
5199	CC602	0	0	2	2	3	3	3	3	3	3	3	3	1	1	3	3	2	2
5200	CC603	0	0	1	2	3	3	1	3	1	3	3	3	1	3	3	3	2	3
5201	CC604	0	0	1	2	3	3	3	3	3	3	3	3	1	1	3	3	2	2
5202	CC605	0	0	2	2	1	3	1	3	1	3	1	3	1	1	3	3	2	2
5203	CC606	0	0	2	2	3	3	3	3	0	0	3	3	3	3	3	3	2	2
5204	CC607	0	0	1	2	1	3	1	1	0	0	3	3	1	1	3	3	3	3
5205	CC608	0	0	1	2	1	3	1	3	1	3	3	3	1	3	3	3	2	3
5206	CC609	0	0	2	2	3	3	3	3	3	3	3	3	3	3	3	3	2	2
5207	CC610	0	0	1	2	3	3	1	3	1	3	3	3	1	3	1	3	2	3
5208	CC611	0	0	1	2	1	3	1	3	1	3	3	3	1	3	3	3	2	3
5209	CC612	0	0	1	2	3	3	1	3	1	3	3	3	1	3	1	3	2	3
5210	CC613	0	0	1	2	3	3	1	3	0	0	3	3	1	3	0	0	2	3
5211	CC614	0	0	1	2	3	3	3	3	0	0	3	3	3	3	3	3	2	2
5212	CC615	0	0	1	2	3	3	1	3	0	0	3	3	1	3	3	3	2	3
5213	CC616	0	0	2	2	3	3	3	3	3	3	1	3	3	3	1	3	2	2
5214	CC617	0	0	2	2	3	3	3	3	3	3	3	3	3	3	3	3	2	2
5215	CC618	0	0	2	2	3	3	3	3	3	3	3	3	3	3	3	3	2	3
5216	CC619	0	0	2	2	3	3	3	3	3	3	3	3	3	3	3	3	2	2
5217	CC620	0	0	2	2	3	3	3	3	3	3	3	3	3	3	3	3	2	2
5218	CC621	0	0	2	2	1	3	3	3	3	3	1	3	3	3	1	3	2	2
5219	CC622	0	0	2	2	1	3	1	3	0	0	3	3	1	3	3	3	2	3
5220	CC623	0	0	2	2	3	3	1	3	1	3	3	3	1	3	0	0	2	3
5221	CC624	0	0	1	2	3	3	3	3	3	3	3	3	3	3	3	3	2	3
5222	CC625	0	0	1	2	3	3	1	3	1	3	3	3	1	3	3	3	3	3
5223	CC626	0	0	2	2	3	3	3	3	3	3	3	3	3	3	3	3	2	2
5224	CC627	0	0	1	2	1	1	1	1	0	0	3	3	1	1	3	3	3	3
5225	CC628	0	0	1	2	1	3	1	1	1	1	3	3	1	1	3	3	3	3
5226	CC629	0	0	1	2	3	3	3	3	3	3	3	3	3	3	0	0	2	2
5227	CC630	0	0	1	2	3	3	1	3	0	0	3	3	1	3	3	3	3	3
5228	CC631	0	0	1	2	1	3	1	1	1	1	3	3	1	1	3	3	3	3
5229	CC632	0	0	2	2	3	3	1	3	1	3	3	3	1	3	3	3	2	3
5230	CC633	0	0	2	2	3	3	3	3	3	3	3	3	3	3	3	3	2	2
5231	CC634	0	0	2	2	1	3	1	3	1	3	3	3	1	3	3	3	2	3
5232	CC635	0	0	2	2	3	3	1	3	1	3	3	3	1	3	3	3	3	3
5233	CC636	0	0	2	2	1	3	1	3	1	3	3	3	1	3	3	3	2	3
5234	CC637	0	0	2	2	3	3	1	3	1	3	3	3	1	3	3	3	2	3
5235	CC638	0	0	2	2	1	3	1	3	0	0	3	3	1	3	3	3	2	3
5236	CC639	0	0	1	2	1	3	1	3	1	3	3	3	1	3	3	3	2	3
5237	CC640	0	0	1	2	3	3	3	3	3	3	3	3	3	3	3	3	2	3
5238	CC641	0	0	1	2	3	3	3	3	3	3	3	3	3	3	3	3	2	2
5239	CC642	0	0	2	2	1	1	1	1	1	1	3	3	1	1	3	3	3	3
5240	CC643	0	0	1	2	1	3	1	3	1	3	3	3	1	3	3	3	2	3
5241	CC644	0	0	1	2	3	3	3	3	3	3	3	3	3	3	3	3	2	2
5242	CC645	0	0	2	2	3	3	1	3	1	3	3	3	1	3	3	3	2	3
5243	CC646	0	0	2	2	3	3	1	3	1	3	1	3	1	3	1	3	2	3
5244	CC647	0	0	1	2	3	3	3	3	3	3	3	3	3	3	3	3	2	3
5245	CC648	0	0	1	2	3	3	3	3	3	3	3	3	3	3	3	3	2	2
5246	CC649	0	0	2	2	1	3	1	1	1	1	3	3	1	1	3	3	3	3
5247	CC650	0	0	1	2	3	3	3	3	3	3	3	3	3	3	3	3	2	2
5248	CC651	0	0	1	2	1	3	1	3	0	0	3	3	1	3	3	3	2	3
5249	CC652	0	0	2	2	3	3	3	3	3	3	3	3	3	3	3	3	2	2
5250	CC653	0	0	2	2	3	3	1	3	1	3	3	3	1	3	3	3	2	3
5251	CC654	0	0	2	2	3	3	3	3	3	3	3	3	1	1	3	3	2	2
5252	CC655	0	0	2	2	3	3	1	1	1	1	3	3	3	3	3	3	3	3
5253	CC656	0	0	2	2	3	3	0	0	1	3	3	3	1	3	1	3	2	3
5254	CC657	0	0	2	2	1	3	1	3	1	3	3	3	1	3	3	3	2	3
5255	DM006	0	0	1	2	3	3	3	3	3	3	3	3	1	1	3	3	2	2
5256	DM007	0	0	1	2	3	3	3	3	3	3	1	3	1	1	1	3	2	2
5257	DM024	0	0	2	2	1	3	1	3	1	3	3	3	1	3	3	3	2	3
5258	DM030	0	0	1	2	3	3	1	3	0	0	3	3	1	3	1	3	2	3
5259	DM044	0	0	1	2	3	3	1	3	1	3	3	3	1	3	3	3	2	3
5260	DM046	0	0	1	2	3	3	3	3	3	3	3	3	1	1	3	3	2	2
5261	DM061	0	0	2	2	3	3	1	3	1	3	3	3	1	3	1	3	2	3
5262	DM064	0	0	1	2	3	3	1	3	1	3	3	3	1	3	3	3	2	3
5263	DM080	0	0	2	2	1	1	1	1	0	0	3	3	3	3	0	0	3	3
5264	DM101	0	0	1	2	3	3	1	3	0	0	3	3	1	3	1	3	2	3
5265	DM103	0	0	1	2	3	3	1	3	0	0	3	3	1	3	3	3	2	3
5266	DM114	0	0	1	2	3	3	3	3	3	3	1	3	1	1	3	3	2	2
5267	DM115	0	0	2	2	3	3	1	3	1	3	3	3	1	3	0	0	2	3
5268	DM125	0	0	2	2	3	3	3	3	3	3	3	3	1	1	3	3	2	2
5269	DM176	0	0	1	2	1	3	1	3	1	3	3	3	3	3	3	3	2	3
5270	DM215	0	0	2	2	0	0	1	3	1	3	3	3	1	3	3	3	2	3
5271	DM232	0	0	2	2	3	3	3	3	3	3	3	3	1	1	3	3	2	2
5272	DM249	0	0	2	2	3	3	3	3	0	0	1	3	0	0	0	0	2	2
5273	DM256	0	0	1	2	3	3	1	1	1	1	3	3	3	3	3	3	3	3
5274	DM260	0	0	1	2	1	3	1	3	1	3	3	3	1	3	3	3	2	3
5275	DM261	0	0	1	2	1	3	1	3	1	3	3	3	1	3	3	3	2	3
5276	DM265	0	0	2	2	3	3	3	3	3	3	3	3	1	1	3	3	2	3
5277	DM268	0	0	1	2	1	3	1	3	1	3	3	3	1	3	3	3	2	3
5278	DM279	0	0	1	2	3	3	1	3	0	0	3	3	1	3	1	3	3	3
5279	DM292	0	0	1	2	1	3	1	1	1	1	3	3	3	3	3	3	3	3
5280	DM293	0	0	2	2	3	3	1	1	1	1	3	3	3	3	3	3	3	3
5281	DM295	0	0	1	2	3	3	3	3	3	3	3	3	1	1	3	3	2	2
5282	DM299	0	0	1	2	3	3	1	3	1	3	3	3	1	3	1	3	2	3
5283	DM300	0	0	2	2	3	3	1	3	1	3	3	3	1	3	3	3	2	3
5284	DM302	0	0	2	2	1	1	1	1	1	1	3	3	3	3	3	3	3	3
5285	DM303	0	0	1	2	3	3	3	3	0	0	3	3	1	1	3	3	2	3
5286	DM312	0	0	1	2	1	3	1	3	1	3	3	3	1	3	3	3	2	3
5287	DM313	0	0	1	2	3	3	1	3	1	3	3	3	1	3	3	3	2	3
5288	DM314	0	0	1	2	3	3	1	3	1	3	3	3	1	3	1	3	2	3
5289	DM315	0	0	2	2	3	3	1	1	1	1	3	3	3	3	1	3	3	3
5290	DM316	0	0	2	2	3	3	1	3	1	3	3	3	1	1	3	3	2	3
5292	DM323	0	0	1	2	1	3	1	3	1	3	3	3	1	3	3	3	2	3
5293	DM326	0	0	2	2	1	3	1	3	1	3	1	3	1	3	3	3	2	3
5294	DM330	0	0	1	2	3	3	1	1	0	0	3	3	3	3	3	3	3	3
5295	DM333	0	0	1	2	3	3	1	3	1	3	3	3	1	3	3	3	2	3
5296	DM337	0	0	2	2	3	3	1	3	1	3	3	3	1	3	3	3	2	3
5297	DM339	0	0	1	2	3	3	3	3	3	3	3	3	1	1	3	3	2	2
5298	DM351	0	0	2	2	3	3	3	3	3	3	3	3	1	1	3	3	2	2
5299	DM367	0	0	2	2	3	3	1	3	1	3	3	3	1	3	1	3	2	3
5300	DM376	0	0	1	2	3	3	1	3	1	3	3	3	1	3	3	3	2	3
5301	DM385	0	0	1	2	3	3	3	3	3	3	3	3	1	1	3	3	2	2
5302	DM389	0	0	2	2	3	3	1	3	1	3	3	3	1	3	3	3	2	3
5303	DM391	0	0	2	2	0	0	0	0	0	0	3	3	1	1	0	0	2	2
5304	DM410	0	0	2	2	3	3	3	3	3	3	3	3	1	1	3	3	2	2
5305	DM412	0	0	1	2	3	3	1	1	1	1	3	3	3	3	3	3	3	3
5306	DM421	0	0	1	2	1	3	1	3	1	3	3	3	1	3	3	3	2	3
5307	DM422	0	0	1	2	3	3	3	3	3	3	3	3	1	1	3	3	2	2
5308	DM424	0	0	1	2	3	3	3	3	3	3	3	3	1	1	3	3	2	3
5309	DM427	0	0	1	2	3	3	3	3	3	3	3	3	1	1	3	3	2	3
5310	DM440	0	0	1	2	3	3	0	0	3	3	3	3	1	1	0	0	2	2
5311	DM441	0	0	1	2	1	3	1	3	0	0	3	3	1	3	3	3	2	3
5312	DM449	0	0	2	2	3	3	3	3	3	3	1	3	1	1	1	3	2	2
5313	DM454	0	0	2	2	1	3	1	3	1	3	3	3	1	3	3	3	2	3
5314	DM461	0	0	1	2	1	1	1	1	1	1	3	3	3	3	3	3	3	3
5315	DM462	0	0	2	2	3	3	0	0	3	3	3	3	1	1	3	3	2	3
5316	DM464	0	0	1	2	3	3	3	3	3	3	3	3	1	1	3	3	2	2
5317	DM466	0	0	2	2	3	3	3	3	3	3	3	3	1	1	3	3	2	2
5318	DM482	0	0	1	2	3	3	3	3	3	3	3	3	1	1	3	3	2	2
5319	DM494	0	0	1	2	3	3	1	1	1	1	3	3	3	3	1	1	3	3
5320	DM500	0	0	2	2	1	3	1	3	1	3	3	3	1	3	3	3	2	3
5321	DM510	0	0	1	2	3	3	3	3	3	3	3	3	1	1	3	3	2	2
5322	DM511	0	0	1	2	1	3	1	3	1	3	1	3	1	3	3	3	2	3
5323	DM513	0	0	2	2	3	3	3	3	3	3	3	3	1	1	1	3	2	2
5324	DM517	0	0	1	2	1	3	1	3	1	3	3	3	1	3	3	3	3	3
5325	DM520	0	0	2	2	3	3	3	3	3	3	3	3	1	1	1	3	2	2
5326	DM528	0	0	2	2	3	3	3	3	3	3	3	3	1	1	3	3	2	2
5327	DM529	0	0	1	2	3	3	3	3	3	3	3	3	1	1	3	3	2	2
5328	DM532	0	0	2	2	1	3	1	1	1	1	3	3	3	3	3	3	3	3
5329	DM533	0	0	1	2	3	3	1	3	1	3	3	3	1	3	3	3	2	3
5330	DM534	0	0	2	2	3	3	1	3	1	3	3	3	1	3	3	3	2	3
5331	DM536	0	0	2	2	1	3	1	3	1	3	3	3	1	3	3	3	2	3
5332	DM537	0	0	2	2	3	3	1	3	1	3	3	3	1	3	1	3	2	3
5333	DM539	0	0	2	2	1	3	0	0	1	3	3	3	1	3	3	3	2	3
5334	DM544	0	0	1	2	3	3	1	3	1	3	3	3	1	3	3	3	2	3
5335	DM572	0	0	1	2	3	3	3	3	3	3	3	3	1	1	3	3	2	2
5336	DM590	0	0	2	2	3	3	3	3	3	3	3	3	1	1	3	3	2	2
5337	DM618	0	0	1	2	3	3	3	3	3	3	3	3	1	1	3	3	2	2
5338	DM622	0	0	1	2	1	3	1	3	1	3	3	3	1	3	3	3	2	3
5339	DM623	0	0	2	2	1	3	1	3	1	3	3	3	1	3	3	3	2	3
5340	DM626	0	0	2	2	1	3	0	0	0	0	3	3	1	3	0	0	2	3
5341	DM628	0	0	1	2	3	3	3	3	3	3	3	3	1	1	3	3	2	2
5342	DM632	0	0	1	2	3	3	3	3	3	3	3	3	1	1	3	3	2	2
5343	DM637	0	0	1	2	3	3	3	3	3	3	3	3	1	1	3	3	2	2
5344	DM643	0	0	1	2	3	3	3	3	3	3	3	3	1	1	3	3	2	3
5345	DM647	0	0	2	2	1	3	3	3	3	3	1	3	1	1	1	3	2	2
5346	DM657	0	0	1	2	3	3	3	3	3	3	3	3	1	1	3	3	2	2
5347	DM658	0	0	2	2	3	3	0	0	3	3	3	3	1	1	3	3	2	3
5348	DM669	0	0	2	2	1	3	1	3	1	3	3	3	1	3	3	3	0	0
5349	DM697	0	0	1	2	0	0	0	0	0	0	0	0	0	0	0	0	2	2
5350	IZ458	0	0	1	2	0	0	0	0	0	0	0	0	3	3	3	3	3	3
5351	IZ504	0	0	1	2	0	0	3	3	0	0	0	0	1	1	3	3	2	2
5352	IZ685	0	0	2	2	0	0	1	3	0	0	0	0	1	3	3	3	2	3
5353	NC322	0	0	2	2	0	0	0	0	0	0	0	0	0	0	0	0	3	3
5354	NC373	0	0	2	2	0	0	0	0	0	0	0	0	0	0	0	0	2	3
5355	NC421	0	0	1	2	0	0	0	0	0	0	0	0	0	0	0	0	2	3
5356	NC476	0	0	2	2	0	0	0	0	0	0	0	0	0	0	0	0	3	3
5357	NC556	0	0	2	2	0	0	0	0	0	0	0	0	0	0	0	0	2	3
5358	RC295	0	0	1	2	0	0	0	0	0	0	0	0	1	3	3	3	2	3
5359	DM701	0	0	1	2	3	3	3	3	3	3	3	3	1	1	3	3	2	2
5360	DM702	0	0	1	2	3	3	3	3	3	3	3	3	1	1	3	3	2	3
5361	DM703	0	0	1	2	3	3	3	3	3	3	3	3	1	1	3	3	2	2
5362	DM704	0	0	2	2	3	3	3	3	3	3	3	3	1	1	3	3	0	0
5363	DM705	0	0	2	2	3	3	3	3	3	3	3	3	1	1	3	3	0	0
5364	DM706	0	0	1	2	3	3	1	3	1	3	3	3	1	3	1	3	2	3
5365	DM707	0	0	1	2	3	3	3	3	0	0	0	0	0	0	0	0	2	2
5366	DM708	0	0	2	2	3	3	3	3	3	3	3	3	1	1	3	3	2	2
5367	DM709	0	0	2	2	0	0	0	0	1	1	3	3	3	3	0	0	3	3
5369	DM711	0	0	1	2	3	3	3	3	3	3	3	3	1	1	3	3	2	2
5370	DM712	0	0	2	2	1	3	3	3	3	3	1	3	1	1	1	3	2	2
5371	DM713	0	0	2	2	1	3	1	3	1	3	3	3	1	3	3	3	2	3
5372	DM714	0	0	1	2	3	3	3	3	3	3	1	3	1	1	1	3	2	2
5373	DM715	0	0	1	2	3	3	1	3	1	3	3	3	1	3	3	3	2	3
5374	DM716	0	0	2	2	3	3	1	3	1	3	3	3	1	3	3	3	0	0
5375	DM717	0	0	2	2	0	0	0	0	0	0	3	3	1	1	0	0	0	0
5376	DM718	0	0	2	2	3	3	3	3	3	3	1	3	1	1	1	3	2	2
5377	DM719	0	0	2	2	1	3	1	3	1	3	3	3	1	3	3	3	2	3
5378	DM720	0	0	2	2	3	3	1	3	1	3	3	3	1	3	3	3	2	3
5379	DM721	0	0	2	2	3	3	1	1	1	1	3	3	3	3	1	3	3	3
5380	DM722	0	0	2	2	3	3	3	3	3	3	3	3	1	1	3	3	2	2
5381	DM723	0	0	2	2	3	3	3	3	3	3	3	3	1	1	3	3	2	2
5382	DM724	0	0	1	2	3	3	3	3	0	0	3	3	1	1	3	3	2	2
5383	DM725	0	0	2	2	3	3	0	0	3	3	3	3	1	1	3	3	2	2
5384	DM726	0	0	1	2	3	3	3	3	3	3	3	3	1	1	3	3	2	2
5385	DM727	0	0	1	2	3	3	1	3	1	3	3	3	1	3	3	3	2	3
5386	DM728	0	0	1	2	3	3	3	3	3	3	3	3	1	1	3	3	2	2
5387	DM729	0	0	2	2	3	3	1	3	1	3	3	3	1	3	1	3	2	3
5388	DM730	0	0	1	2	1	3	1	3	1	3	3	3	1	3	3	3	2	3
5389	DM731	0	0	2	2	3	3	1	1	1	1	3	3	3	3	3	3	3	3
5390	DM732	0	0	1	2	1	3	1	1	1	1	3	3	3	3	3	3	3	3
5391	DM733	0	0	1	2	0	0	0	0	3	3	3	3	1	1	3	3	0	0
5392	DM734	0	0	2	2	1	3	1	1	1	1	3	3	3	3	3	3	3	3
5393	DM735	0	0	2	2	0	0	1	3	1	3	3	3	1	3	3	3	2	3
5394	DM736	0	0	2	2	3	3	3	3	3	3	3	3	1	3	3	3	2	2
5395	DM737	0	0	1	2	3	3	1	3	1	3	1	3	1	3	1	1	2	3
5396	DM738	0	0	1	2	3	3	3	3	3	3	3	3	1	1	3	3	2	2
5397	DM739	0	0	2	2	3	3	3	3	3	3	3	3	1	3	3	3	2	3
5398	DM740	0	0	2	2	1	3	1	3	1	3	3	3	1	3	3	3	2	3
5399	DM741	0	0	1	2	1	1	1	1	1	1	3	3	3	3	3	3	3	3
5400	DM742	0	0	1	2	3	3	1	3	1	3	3	3	1	3	3	3	2	3
5401	DM743	0	0	2	2	3	3	3	3	3	3	3	3	1	1	3	3	2	3
5402	DM744	0	0	2	2	0	0	1	3	1	3	3	3	1	3	3	3	2	3
5403	DM745	0	0	1	2	3	3	3	3	3	3	3	3	1	1	3	3	2	2
5404	DM746	0	0	1	2	3	3	3	3	3	3	3	3	1	1	3	3	2	2
5405	DM747	0	0	2	2	3	3	1	1	1	1	3	3	3	3	3	3	3	3
5406	DM748	0	0	2	2	3	3	3	3	3	3	1	3	1	1	1	3	2	2
5407	DM749	0	0	1	2	0	0	0	0	0	0	3	3	1	1	0	0	0	0
5408	DM750	0	0	2	2	3	3	1	3	1	3	3	3	1	3	3	3	2	3
5409	DM751	0	0	1	2	3	3	1	3	1	3	0	0	1	3	1	3	2	3
5410	DM752	0	0	2	2	0	0	1	3	0	0	1	3	1	1	1	3	2	3
5411	DM753	0	0	2	2	3	3	3	3	3	3	3	3	1	1	3	3	2	2
5412	DM754	0	0	1	2	1	3	1	3	1	3	3	3	1	3	3	3	2	3
5413	DM755	0	0	1	2	3	3	1	3	1	3	3	3	3	3	3	3	2	3
5414	DM756	0	0	1	2	1	1	0	0	0	0	3	3	3	3	0	0	3	3
5415	DM757	0	0	1	2	3	3	0	0	1	3	3	3	1	3	3	3	2	3
5416	DM758	0	0	1	2	1	3	1	3	1	3	3	3	1	3	3	3	2	3
5417	DM759	0	0	1	2	1	3	1	1	1	1	3	3	3	3	3	3	3	3
5418	DM760	0	0	2	2	3	3	1	1	1	1	3	3	3	3	1	3	3	3
5419	DM761	0	0	2	2	1	1	1	1	1	1	3	3	3	3	3	3	3	3
5420	DM762	0	0	1	2	1	3	1	3	1	3	3	3	1	3	3	3	2	3
5421	DM763	0	0	2	2	1	3	1	3	1	3	3	3	1	3	3	3	2	3
5422	DM764	0	0	1	2	1	3	0	0	0	0	3	3	1	3	0	0	2	3
5423	DM765	0	0	1	2	3	3	1	1	1	1	3	3	3	3	3	3	3	3
5424	DM766	0	0	1	2	3	3	3	3	3	3	3	3	1	1	3	3	2	2
5425	DM767	0	0	1	2	3	3	1	3	1	3	3	3	1	3	3	3	2	3
5426	DM768	0	0	1	2	1	3	1	3	1	3	3	3	1	3	3	3	2	3
5427	DM769	0	0	1	2	1	3	1	3	1	3	3	3	1	3	3	3	2	3
5428	DM770	0	0	2	2	3	3	3	3	3	3	3	3	1	1	3	3	2	3
5429	DM771	0	0	2	2	1	3	1	1	1	1	3	3	3	3	3	3	3	3
5430	DM772	0	0	2	2	1	3	1	3	0	0	3	3	1	3	3	3	2	3
5431	DM773	0	0	2	2	1	3	1	3	1	3	3	3	1	3	3	3	2	3
5432	DM774	0	0	2	2	3	3	1	3	1	3	3	3	1	3	3	3	2	3
5433	DM775	0	0	1	2	3	3	1	3	1	3	3	3	1	3	3	3	2	3
5434	DM776	0	0	2	2	3	3	3	3	3	3	3	3	1	1	3	3	2	2
5435	DM777	0	0	1	2	3	3	1	1	1	1	3	3	3	3	1	3	3	3
5436	DM778	0	0	2	2	1	1	1	1	1	1	3	3	3	3	1	3	3	3
5437	DM779	0	0	2	2	3	3	3	3	3	3	1	3	1	1	1	3	2	2
5438	DM780	0	0	1	2	3	3	3	3	3	3	3	3	1	1	3	3	2	3
5439	DM781	0	0	2	2	3	3	3	3	3	3	3	3	1	1	3	3	2	2
5440	DM782	0	0	2	2	0	0	0	0	0	0	3	3	3	3	0	0	0	0
5441	DM783	0	0	1	2	3	3	3	3	3	3	3	3	1	1	3	3	2	2
5442	DM784	0	0	1	2	3	3	3	3	3	3	3	3	1	1	3	3	2	3
5443	DM785	0	0	1	2	3	3	1	3	1	3	3	3	1	3	3	3	2	3
5444	DM786	0	0	2	2	3	3	3	3	3	3	3	3	1	1	3	3	2	2
5445	DM787	0	0	1	2	3	3	3	3	3	3	3	3	1	1	0	0	2	2
5446	DM788	0	0	1	2	1	3	0	0	0	0	3	3	1	3	0	0	0	0
5447	DM789	0	0	2	2	1	3	1	1	1	1	3	3	3	3	1	3	3	3
5448	DM790	0	0	2	2	3	3	3	3	3	3	3	3	1	1	1	3	2	2
5449	DM791	0	0	2	2	3	3	3	3	3	3	3	3	1	1	3	3	2	3
5450	DM792	0	0	1	2	3	3	1	3	1	3	3	3	1	3	1	3	2	3
5451	DM793	0	0	1	2	3	3	3	3	3	3	3	3	1	1	3	3	2	2
5452	DM794	0	0	1	2	3	3	3	3	3	3	3	3	1	1	3	3	2	2
5453	DM795	0	0	2	2	3	3	1	3	0	0	3	3	1	3	0	0	0	0
5454	DM835	0	0	2	2	3	3	1	3	0	0	3	3	1	3	3	3	2	3
5455	DM836	0	0	1	2	3	3	3	3	3	3	3	3	1	1	0	0	2	2
5456	DM837	0	0	1	2	3	3	1	3	1	3	3	3	1	3	1	3	2	3
5457	DM838	0	0	1	2	3	3	3	3	3	3	3	3	1	1	3	3	2	2
5458	DM839	0	0	2	2	1	1	1	1	1	1	3	3	3	3	1	3	3	3
5459	DM840	0	0	1	2	3	3	3	3	3	3	3	3	1	1	3	3	2	2
5460	DM841	0	0	1	2	1	3	1	3	1	3	3	3	1	3	3	3	2	3
5461	DM842	0	0	1	2	3	3	1	3	1	3	3	3	1	3	1	3	2	3
5462	DM843	0	0	1	2	0	0	1	3	1	3	3	3	1	3	1	3	2	3
5463	DM844	0	0	1	2	3	3	1	3	0	0	3	3	1	3	0	0	2	3
5464	DM845	0	0	2	2	1	3	1	3	1	3	3	3	1	3	3	3	2	3
5465	DM846	0	0	1	2	3	3	1	3	1	3	3	3	1	3	3	3	2	3
5466	DM847	0	0	1	2	3	3	1	3	0	0	3	3	1	3	3	3	2	3
5467	DM848	0	0	1	2	1	3	1	1	1	1	3	3	3	3	3	3	3	3
5468	DM849	0	0	1	2	3	3	3	3	3	3	3	3	1	1	3	3	2	2
5469	DM850	0	0	1	2	3	3	3	3	3	3	3	3	1	1	3	3	2	2
5470	DM851	0	0	2	2	0	0	0	0	0	0	3	3	1	3	0	0	2	3
5471	DM852	0	0	1	2	1	3	1	1	1	1	3	3	3	3	0	0	3	3
5472	DM853	0	0	2	2	3	3	3	3	3	3	3	3	1	1	3	3	2	2
5473	DM854	0	0	2	2	3	3	3	3	3	3	3	3	1	1	3	3	2	2
5474	DM855	0	0	2	2	3	3	3	3	3	3	3	3	1	1	3	3	2	2
5475	DM856	0	0	1	2	3	3	1	3	1	3	3	3	1	3	3	3	2	3
5476	DM857	0	0	2	2	1	3	1	3	1	3	3	3	1	3	3	3	0	0
5477	DM858	0	0	2	2	3	3	3	3	3	3	3	3	1	1	3	3	2	2
5478	DM859	0	0	2	2	0	0	3	3	0	0	3	3	1	1	3	3	2	2
5479	DM860	0	0	2	2	3	3	1	3	1	3	3	3	1	3	1	3	2	3
5480	DM861	0	0	1	2	1	3	1	3	1	3	3	3	1	3	3	3	2	3
5481	DM862	0	0	1	2	3	3	1	3	1	3	3	3	1	3	3	3	2	3
5482	DM863	0	0	2	2	3	3	1	3	1	3	3	3	1	3	3	3	2	3
5483	DM864	0	0	1	2	3	3	3	3	3	3	3	3	1	1	3	3	2	2
5484	DM865	0	0	2	2	3	3	1	3	1	3	3	3	1	3	3	3	2	3
5485	DM866	0	0	2	2	1	3	1	3	1	3	1	3	1	3	1	3	2	3
5486	DM867	0	0	1	2	1	3	1	1	1	1	3	3	3	3	3	3	3	3
5487	DM868	0	0	1	2	3	3	3	3	3	3	3	3	1	1	3	3	2	2
5488	DM869	0	0	1	2	3	3	1	3	1	3	3	3	1	3	1	3	2	3
5489	DM870	0	0	1	2	1	3	1	1	1	1	3	3	3	3	0	0	3	3
5490	DM871	0	0	2	2	3	3	1	3	1	3	3	3	1	3	3	3	2	3
5491	DM872	0	0	2	2	3	3	1	3	1	3	1	3	1	3	1	1	2	3
5492	DM873	0	0	1	2	3	3	1	1	1	1	3	3	3	3	1	1	3	3
5493	DM874	0	0	1	2	3	3	3	3	3	3	3	3	1	1	3	3	2	2
5494	DM875	0	0	1	2	3	3	1	3	1	3	3	3	1	1	3	3	2	2
5495	DM876	0	0	1	2	3	3	1	3	1	3	3	3	1	3	3	3	2	3
5496	DM877	0	0	1	2	3	3	3	3	3	3	3	3	1	1	3	3	2	2
5497	DM878	0	0	1	2	3	3	1	3	1	3	3	3	1	3	3	3	2	3
5498	DM879	0	0	1	2	3	3	3	3	3	3	3	3	1	3	3	3	2	3
5499	DM880	0	0	1	2	3	3	1	1	1	1	3	3	3	3	1	3	3	3
5500	DM881	0	0	1	2	1	3	3	3	3	3	1	3	1	1	1	3	2	2
5501	DM882	0	0	2	2	3	3	3	3	3	3	3	3	1	1	3	3	2	2
5502	DM883	0	0	1	2	1	3	0	0	1	3	3	3	1	3	0	0	0	0
5503	DM884	0	0	2	2	1	1	1	1	1	1	3	3	3	3	3	3	3	3
5504	DM885	0	0	2	2	1	3	1	3	1	3	3	3	1	3	3	3	2	3
5505	DM886	0	0	1	2	3	3	3	3	3	3	3	3	1	1	3	3	2	3
5506	DM887	0	0	1	2	3	3	3	3	3	3	3	3	1	1	3	3	2	2
5507	DM888	0	0	2	2	1	3	1	1	1	1	3	3	3	3	3	3	3	3
5508	DM889	0	0	2	2	3	3	3	3	3	3	3	3	1	1	3	3	2	2
5509	DM890	0	0	2	2	1	3	1	3	3	3	3	3	1	3	3	3	2	3
5510	CK002	0	0	2	1	0	0	0	0	0	0	0	0	0	0	0	0	2	3
5511	CK003	0	0	1	1	0	0	0	0	0	0	0	0	0	0	0	0	2	3
5512	CK007	0	0	2	1	0	0	0	0	0	0	0	0	0	0	0	0	3	3
5513	CK008	0	0	2	1	0	0	0	0	0	0	0	0	0	0	0	0	2	2
5514	CK009	0	0	2	1	0	0	0	0	0	0	0	0	0	0	0	0	2	2
5515	CK012	0	0	1	1	0	0	0	0	0	0	0	0	0	0	0	0	2	2
5516	CK013	0	0	1	1	0	0	0	0	0	0	0	0	0	0	0	0	3	3
5517	CK014	0	0	2	1	0	0	0	0	0	0	0	0	0	0	0	0	3	3
5518	CK015	0	0	2	1	0	0	0	0	0	0	0	0	0	0	0	0	3	3
5519	CK016	0	0	2	1	0	0	0	0	0	0	0	0	0	0	0	0	2	3
5520	CK017	0	0	2	1	0	0	0	0	0	0	0	0	0	0	0	0	2	3
5521	CK020	0	0	2	1	0	0	0	0	0	0	0	0	0	0	0	0	2	3
5522	CK021	0	0	2	1	0	0	0	0	0	0	0	0	0	0	0	0	2	3
5523	CK022	0	0	2	1	0	0	0	0	0	0	0	0	0	0	0	0	2	3
5524	CK029	0	0	2	1	0	0	0	0	0	0	0	0	0	0	0	0	2	3
5525	CK032	0	0	1	1	0	0	0	0	0	0	0	0	0	0	0	0	2	3
5526	CK034	0	0	1	1	0	0	0	0	0	0	0	0	0	0	0	0	2	2
5527	CK035	0	0	2	1	0	0	0	0	0	0	0	0	0	0	0	0	2	3
5528	CK036	0	0	2	1	0	0	0	0	0	0	0	0	0	0	0	0	3	3
5529	CK037	0	0	2	1	0	0	0	0	0	0	0	0	0	0	0	0	2	3
5530	CK039	0	0	1	1	0	0	0	0	0	0	0	0	0	0	0	0	3	3
5531	CK041	0	0	2	1	0	0	0	0	0	0	0	0	0	0	0	0	2	3
5532	CK042	0	0	2	1	0	0	0	0	0	0	0	0	0	0	0	0	2	2
5533	CK044	0	0	2	1	0	0	0	0	0	0	0	0	0	0	0	0	2	3
5534	CK045	0	0	2	1	0	0	0	0	0	0	0	0	0	0	0	0	2	2
5535	CK046	0	0	2	1	0	0	0	0	0	0	0	0	0	0	0	0	2	2
5536	CK049	0	0	1	1	0	0	0	0	0	0	0	0	0	0	0	0	3	3
5537	CK050	0	0	1	1	0	0	0	0	0	0	0	0	0	0	0	0	2	2
5538	IZ157	0	0	1	1	3	3	3	3	0	0	0	0	1	1	3	3	2	2
5539	IZ158	0	0	2	1	0	0	0	0	0	0	0	0	1	3	3	3	2	3
5540	IZ159	0	0	2	1	0	0	0	0	0	0	0	0	1	1	1	3	2	2
5541	IZ203	0	0	1	1	0	0	0	0	0	0	0	0	1	1	1	3	2	3
5542	IZ204	0	0	1	1	3	3	3	3	0	0	0	0	1	1	3	3	2	2
5543	IZ237	0	0	1	1	3	3	1	3	0	0	0	0	1	3	3	3	2	3
5544	IZ318	0	0	1	1	1	3	1	3	1	3	0	0	1	3	3	3	2	3
5545	IZ401	0	0	2	1	0	0	1	3	0	0	0	0	1	3	3	3	2	3
5546	IZ402	0	0	2	1	0	0	1	3	0	0	0	0	1	3	3	3	2	3
5547	IZ404	0	0	2	1	0	0	0	0	0	0	0	0	3	3	1	3	3	3
5548	IZ408	0	0	2	1	0	0	1	1	0	0	0	0	3	3	1	3	3	3
5549	IZ409	0	0	2	1	0	0	1	3	0	0	0	0	1	3	3	3	2	3
5550	IZ410	0	0	2	1	0	0	0	0	0	0	0	0	1	1	3	3	2	2
5551	IZ413	0	0	2	1	0	0	0	0	0	0	0	0	3	3	3	3	3	3
5552	IZ414	0	0	2	1	0	0	1	3	0	0	0	0	1	3	3	3	2	3
5553	IZ416	0	0	2	1	0	0	0	0	0	0	0	0	1	3	3	3	2	3
5554	IZ417	0	0	2	1	0	0	3	3	0	0	0	0	1	1	3	3	2	2
5555	IZ418	0	0	2	1	0	0	0	0	0	0	0	0	3	3	3	3	3	3
5556	IZ419	0	0	1	1	0	0	3	3	0	0	0	0	1	3	1	3	2	3
5557	IZ421	0	0	2	1	0	0	0	0	0	0	0	0	1	3	3	3	2	3
5558	IZ422	0	0	2	1	0	0	1	3	0	0	0	0	1	3	3	3	2	3
5559	IZ423	0	0	2	1	0	0	3	3	0	0	0	0	1	1	3	3	2	2
5560	IZ424	0	0	2	1	0	0	0	0	0	0	0	0	3	3	3	3	3	3
5561	IZ425	0	0	2	1	0	0	0	0	0	0	0	0	1	3	3	3	2	3
5562	IZ426	0	0	2	1	0	0	0	0	0	0	0	0	1	3	3	3	2	3
5563	IZ427	0	0	2	1	0	0	3	3	0	0	0	0	1	1	3	3	2	2
5564	IZ430	0	0	2	1	0	0	0	0	0	0	0	0	3	3	3	3	3	3
5565	IZ431	0	0	2	1	0	0	0	0	0	0	0	0	1	1	1	3	2	2
5566	IZ432	0	0	2	1	0	0	0	0	0	0	0	0	1	3	3	3	2	3
5567	IZ434	0	0	2	1	0	0	0	0	0	0	0	0	1	3	3	3	2	3
5568	IZ435	0	0	1	1	0	0	0	0	0	0	0	0	1	3	3	3	2	3
5569	IZ437	0	0	2	1	0	0	0	0	0	0	0	0	1	3	3	3	2	3
5570	IZ440	0	0	2	1	0	0	0	0	0	0	0	0	1	3	3	3	2	3
5571	IZ442	0	0	2	1	0	0	1	3	0	0	0	0	1	3	3	3	2	3
5572	IZ445	0	0	2	1	0	0	0	0	0	0	0	0	1	1	3	3	2	2
5573	IZ446	0	0	1	1	0	0	1	3	0	0	0	0	1	3	3	3	2	3
5574	IZ447	0	0	2	1	0	0	0	0	0	0	0	0	1	3	3	3	2	3
5575	IZ448	0	0	1	1	0	0	0	0	0	0	0	0	1	3	3	3	2	3
5576	IZ449	0	0	1	1	0	0	0	0	0	0	0	0	1	1	3	3	2	3
5577	IZ450	0	0	2	1	0	0	0	0	0	0	0	0	1	3	3	3	3	3
5578	IZ454	0	0	2	1	0	0	1	3	0	0	0	0	1	3	3	3	2	3
5579	IZ466	0	0	2	1	0	0	0	0	0	0	0	0	3	3	1	3	3	3
5580	IZ490	0	0	1	1	0	0	0	0	0	0	0	0	1	3	3	3	2	3
5581	IZ501	0	0	2	1	0	0	1	1	0	0	0	0	3	3	1	3	3	3
5582	IZ503	0	0	2	1	0	0	1	3	0	0	0	0	1	3	3	3	2	3
5583	IZ509	0	0	1	1	0	0	3	3	0	0	0	0	1	1	1	1	2	2
5584	IZ510	0	0	2	1	0	0	1	3	0	0	0	0	1	3	3	3	2	3
5585	IZ511	0	0	1	1	0	0	1	3	0	0	0	0	1	3	3	3	2	3
5586	IZ512	0	0	1	1	0	0	1	1	0	0	0	0	3	3	3	3	2	3
5587	IZ514	0	0	1	1	0	0	1	3	0	0	0	0	1	3	3	3	2	3
5588	IZ519	0	0	2	1	0	0	3	3	0	0	0	0	1	1	3	3	2	3
5589	IZ526	0	0	1	1	0	0	1	3	0	0	0	0	1	3	3	3	2	3
5590	IZ527	0	0	2	1	1	3	1	3	1	3	3	3	1	3	3	3	2	3
5591	IZ531	0	0	2	1	3	3	3	3	3	3	1	1	1	1	1	3	2	2
5592	IZ532	0	0	1	1	0	0	3	3	0	0	0	0	1	1	3	3	2	2
5593	IZ533	0	0	1	1	0	0	1	3	0	0	0	0	1	3	3	3	2	3
5594	IZ534	0	0	2	1	0	0	1	3	0	0	0	0	1	3	1	3	2	3
5595	IZ535	0	0	1	1	0	0	1	3	0	0	0	0	1	3	1	1	2	3
5596	IZ541	0	0	1	1	0	0	1	3	0	0	0	0	1	1	3	3	2	3
5597	IZ542	0	0	1	1	0	0	3	3	0	0	0	0	1	1	3	3	2	2
5598	IZ543	0	0	1	1	0	0	1	3	0	0	0	0	1	3	3	3	2	3
5599	IZ552	0	0	1	1	0	0	1	1	0	0	0	0	3	3	3	3	3	3
5600	IZ553	0	0	1	1	1	3	1	3	1	3	3	3	1	3	3	3	3	3
5601	IZ555	0	0	1	1	1	3	1	1	1	1	3	3	3	3	3	3	3	3
5602	IZ557	0	0	1	1	0	0	1	3	0	0	0	0	1	3	3	3	2	3
5603	IZ558	0	0	1	1	1	3	1	3	1	3	3	3	1	3	3	3	2	3
5604	IZ561	0	0	2	1	3	3	3	3	3	3	3	3	1	1	3	3	2	3
5605	IZ562	0	0	2	1	1	3	1	3	1	3	1	3	1	3	1	3	2	3
5606	IZ564	0	0	2	1	0	0	3	3	0	0	0	0	1	1	1	3	2	2
5607	IZ572	0	0	1	1	0	0	1	3	0	0	0	0	1	3	3	3	2	3
5608	IZ573	0	0	2	1	0	0	1	3	0	0	0	0	1	3	3	3	2	3
5609	IZ574	0	0	2	1	3	3	1	3	1	3	3	3	1	3	3	3	2	3
5610	IZ576	0	0	1	1	0	0	1	3	0	0	0	0	1	3	3	3	2	3
5611	IZ577	0	0	2	1	0	0	1	3	0	0	0	0	1	3	1	3	3	3
5612	IZ579	0	0	2	1	0	0	1	3	0	0	0	0	1	3	3	3	2	3
5613	IZ580	0	0	1	1	0	0	1	1	0	0	0	0	3	3	3	3	3	3
5614	IZ583	0	0	2	1	0	0	3	3	0	0	0	0	1	1	3	3	2	2
5615	IZ584	0	0	2	1	0	0	3	3	0	0	0	0	1	1	1	3	2	2
5616	IZ585	0	0	2	1	0	0	1	1	0	0	0	0	3	3	3	3	3	3
5617	IZ586	0	0	2	1	0	0	1	3	0	0	0	0	1	3	3	3	2	3
5618	IZ587	0	0	2	1	0	0	1	3	0	0	0	0	1	3	3	3	2	3
5619	IZ589	0	0	2	1	0	0	1	3	0	0	0	0	1	3	3	3	2	3
5620	IZ590	0	0	2	1	0	0	3	3	0	0	0	0	1	1	3	3	2	2
5621	IZ591	0	0	1	1	0	0	1	3	0	0	0	0	1	3	1	3	2	3
5622	IZ592	0	0	1	1	0	0	3	3	0	0	0	0	1	1	3	3	2	2
5623	IZ593	0	0	2	1	0	0	1	3	0	0	0	0	1	3	3	3	2	3
5624	IZ594	0	0	2	1	0	0	1	3	0	0	0	0	3	3	3	3	3	3
5625	IZ595	0	0	1	1	0	0	1	3	0	0	0	0	1	3	3	3	2	3
5626	IZ597	0	0	2	1	1	3	1	3	1	3	1	3	1	3	3	3	2	3
5627	IZ600	0	0	2	1	1	1	1	1	1	1	3	3	3	3	3	3	3	3
5628	IZ605	0	0	2	1	0	0	1	3	0	0	0	0	1	3	3	3	2	3
5629	IZ606	0	0	1	1	0	0	1	3	0	0	0	0	1	3	3	3	2	3
5630	IZ607	0	0	1	1	0	0	1	3	0	0	0	0	1	3	3	3	2	2
5631	IZ608	0	0	1	1	0	0	3	3	0	0	0	0	1	1	3	3	2	2
5632	IZ609	0	0	1	1	1	3	1	1	1	1	3	3	3	3	3	3	3	3
5633	IZ610	0	0	1	1	0	0	3	3	0	0	0	0	1	1	3	3	2	3
5634	IZ611	0	0	2	1	1	3	1	1	1	1	3	3	3	3	3	3	3	3
5635	IZ615	0	0	2	1	1	3	1	3	1	3	3	3	1	3	3	3	2	3
5636	IZ617	0	0	2	1	0	0	1	3	0	0	0	0	1	3	3	3	2	3
5637	IZ619	0	0	1	1	1	3	1	3	1	3	3	3	1	3	3	3	2	3
5638	IZ620	0	0	2	1	3	3	3	3	3	3	3	3	1	1	3	3	2	2
5639	IZ626	0	0	2	1	3	3	3	3	3	3	3	3	1	1	3	3	2	2
5640	IZ628	0	0	2	1	0	0	3	3	0	0	0	0	1	1	3	3	2	2
5641	IZ629	0	0	1	1	3	3	3	3	3	3	3	3	1	1	3	3	2	2
5642	IZ630	0	0	2	1	3	3	1	3	1	3	3	3	1	3	3	3	2	3
5643	IZ642	0	0	1	1	0	0	1	3	0	0	0	0	1	3	3	3	2	3
5644	IZ643	0	0	1	1	0	0	1	3	0	0	0	0	1	3	3	3	2	3
5645	IZ644	0	0	2	1	3	3	3	3	3	3	3	3	1	1	3	3	2	2
5646	IZ647	0	0	2	1	0	0	1	3	0	0	0	0	1	3	1	3	3	3
5647	IZ650	0	0	2	1	3	3	3	3	0	0	3	3	1	1	3	3	2	2
5648	IZ651	0	0	2	1	1	3	1	1	1	1	3	3	3	3	3	3	3	3
5649	IZ652	0	0	2	1	1	3	1	3	1	3	3	3	1	3	3	3	2	3
5650	IZ654	0	0	2	1	1	1	1	1	0	0	3	3	3	3	3	3	3	3
5651	IZ655	0	0	2	1	0	0	1	3	0	0	0	0	1	3	3	3	2	3
5652	IZ656	0	0	2	1	0	0	1	3	0	0	0	0	1	3	1	3	2	3
5653	IZ664	0	0	2	1	0	0	1	1	1	1	3	3	3	3	1	3	3	3
5654	IZ668	0	0	2	1	0	0	3	3	0	0	0	0	1	1	3	3	2	2
5655	IZ671	0	0	2	1	0	0	1	3	0	0	0	0	1	3	3	3	2	3
5656	IZ676	0	0	2	1	0	0	1	1	0	0	0	0	3	3	3	3	3	3
5657	IZ679	0	0	1	1	0	0	3	3	0	0	0	0	1	1	3	3	2	2
5658	IZ682	0	0	1	1	3	3	1	3	0	0	3	3	1	3	3	3	2	3
5659	IZ686	0	0	1	1	3	3	3	3	3	3	3	3	1	1	3	3	2	2
5660	IZ688	0	0	2	1	0	0	3	3	0	0	0	0	1	1	1	3	2	2
5661	IZ689	0	0	2	1	0	0	3	3	0	0	0	0	1	1	1	3	2	2
5662	IZ713	0	0	1	1	1	3	1	3	1	3	3	3	1	3	3	3	2	3
5663	IZ714	0	0	2	1	0	0	1	3	0	0	0	0	1	3	3	3	2	3
5664	IZ717	0	0	2	1	0	0	1	3	0	0	0	0	1	3	3	3	2	3
5665	IZ718	0	0	2	1	0	0	1	1	0	0	0	0	3	3	3	3	3	3
5666	IZ724	0	0	2	1	0	0	1	3	0	0	0	0	1	3	3	3	2	3
5667	IZ731	0	0	2	1	0	0	1	3	0	0	0	0	1	3	3	3	2	3
5668	IZ735	0	0	1	1	0	0	1	3	0	0	0	0	1	3	3	3	2	3
5669	IZ739	0	0	2	1	0	0	1	1	0	0	0	0	3	3	3	3	3	3
5670	IZ742	0	0	1	1	0	0	3	3	0	0	0	0	1	1	3	3	2	2
5671	IZ757	0	0	2	1	0	0	3	3	0	0	0	0	1	1	3	3	2	2
5672	IZ758	0	0	2	1	0	0	1	1	0	0	0	0	3	3	3	3	3	3
5673	IZ760	0	0	1	1	3	3	3	3	3	3	3	3	1	1	3	3	2	2
5674	IZ761	0	0	2	1	0	0	3	3	0	0	0	0	1	1	3	3	2	2
5675	IZ762	0	0	2	1	3	3	3	3	3	3	3	3	1	1	3	3	2	2
5676	IZ763	0	0	1	1	0	0	1	3	0	0	0	0	1	3	3	3	2	3
5677	IZ767	0	0	2	1	3	3	1	3	1	3	3	3	1	3	3	3	2	3
5678	IZ768	0	0	2	1	0	0	3	3	0	0	0	0	1	1	3	3	2	3
5679	IZ770	0	0	1	1	0	0	1	3	0	0	0	0	3	3	3	3	3	3
5680	IZ771	0	0	1	1	0	0	3	3	0	0	0	0	1	1	3	3	2	2
5681	IZ772	0	0	1	1	0	0	3	3	0	0	0	0	1	1	3	3	2	2
5682	IZ773	0	0	2	1	0	0	1	1	0	0	0	0	3	3	3	3	3	3
5683	IZ774	0	0	1	1	0	0	3	3	0	0	0	0	1	1	3	3	2	2
5684	IZ776	0	0	2	1	0	0	3	3	0	0	0	0	1	1	3	3	2	2
5685	IZ777	0	0	2	1	0	0	1	1	0	0	0	0	3	3	3	3	3	3
5686	IZ779	0	0	2	1	0	0	1	3	0	0	0	0	1	3	3	3	2	3
5687	IZ780	0	0	2	1	0	0	1	3	0	0	0	0	1	3	1	3	2	3
5688	IZ781	0	0	1	1	0	0	1	3	0	0	0	0	1	3	3	3	2	3
5689	IZ782	0	0	2	1	0	0	3	3	0	0	0	0	1	3	1	1	2	3
5690	IZ783	0	0	2	1	0	0	1	1	0	0	0	0	3	3	1	3	3	3
5691	IZ784	0	0	2	1	0	0	1	1	0	0	0	0	3	3	3	3	3	3
5692	IZ785	0	0	1	1	0	0	1	3	0	0	0	0	1	3	3	3	2	3
5693	IZ786	0	0	2	1	0	0	1	3	0	0	0	0	1	3	3	3	0	0
5694	IZ788	0	0	1	1	0	0	1	3	0	0	0	0	1	3	3	3	2	3
5695	IZ789	0	0	1	1	0	0	1	3	0	0	0	0	1	3	3	3	2	3
5696	IZ791	0	0	2	1	3	3	3	3	3	3	3	3	1	1	3	3	2	2
5697	IZ793	0	0	1	1	0	0	3	3	0	0	0	0	1	1	3	3	2	2
5698	IZ795	0	0	2	1	0	0	1	1	0	0	0	0	3	3	3	3	3	3
5699	IZ797	0	0	2	1	0	0	3	3	0	0	0	0	1	1	3	3	0	0
5700	IZ801	0	0	2	1	0	0	1	3	0	0	0	0	1	3	3	3	2	3
5701	IZ802	0	0	2	1	0	0	1	3	0	0	0	0	1	3	3	3	2	3
5702	IZ803	0	0	1	1	0	0	1	3	0	0	0	0	1	3	3	3	2	3
5703	IZ804	0	0	1	1	0	0	1	3	0	0	0	0	1	3	3	3	2	3
5704	IZ805	0	0	1	1	0	0	1	1	0	0	0	0	3	3	1	3	3	3
5705	IZ806	0	0	2	1	0	0	0	0	0	0	0	0	3	3	3	3	3	3
5706	IZ807	0	0	2	1	0	0	1	3	1	3	3	3	1	3	3	3	0	0
5707	IZ809	0	0	2	1	0	0	3	3	0	0	0	0	1	1	3	3	2	2
5708	IZ811	0	0	2	1	0	0	1	3	0	0	0	0	1	3	1	3	2	3
5709	IZ813	0	0	2	1	3	3	1	3	1	3	3	3	1	3	3	3	2	3
5710	IZ814	0	0	1	1	0	0	1	3	0	0	0	0	1	3	3	3	2	3
5711	IZ816	0	0	2	1	0	0	3	3	0	0	0	0	1	1	3	3	2	2
5712	IZ817	0	0	2	1	0	0	1	3	0	0	0	0	1	3	3	3	2	3
5713	IZ818	0	0	1	1	0	0	1	3	0	0	0	0	1	3	1	3	3	3
5714	IZ820	0	0	2	1	0	0	1	3	0	0	0	0	1	3	3	3	2	2
5715	IZ822	0	0	2	1	0	0	3	3	0	0	0	0	1	1	3	3	2	2
5716	IZ823	0	0	2	1	0	0	3	3	0	0	0	0	1	1	3	3	2	2
5717	IZ824	0	0	1	1	3	3	1	3	1	3	3	3	1	3	3	3	2	3
5718	IZ825	0	0	2	1	3	3	3	3	3	3	3	3	1	1	3	3	2	2
5719	IZ827	0	0	1	1	0	0	1	3	0	0	0	0	1	3	3	3	2	3
5720	IZ828	0	0	2	1	0	0	1	3	0	0	0	0	1	3	3	3	3	3
5721	IZ829	0	0	1	1	3	3	3	3	3	3	3	3	1	1	3	3	2	2
5722	IZ831	0	0	1	1	3	3	3	3	3	3	3	3	1	1	3	3	2	2
5723	IZ836	0	0	2	1	0	0	1	3	0	0	0	0	0	0	3	3	0	0
5724	IZ837	0	0	2	1	0	0	3	3	0	0	0	0	1	1	3	3	0	0
5725	IZ841	0	0	1	1	0	0	1	3	0	0	0	0	1	3	3	3	0	0
5726	IZ844	0	0	2	1	0	0	3	3	0	0	0	0	1	1	3	3	0	0
5727	IZ845	0	0	2	1	0	0	1	3	0	0	0	0	1	3	3	3	0	0
5728	IZ849	0	0	2	1	0	0	1	3	0	0	0	0	1	3	3	3	0	0
5729	IZ851	0	0	2	1	0	0	3	3	0	0	0	0	1	1	3	3	0	0
5730	IZ852	0	0	2	1	3	3	3	3	3	3	3	3	1	1	3	3	2	2
5731	IZ854	0	0	1	1	0	0	3	3	0	0	0	0	1	1	3	3	0	0
5732	IZ856	0	0	2	1	0	0	3	3	0	0	0	0	1	1	3	3	0	0
5733	IZ857	0	0	2	1	0	0	0	0	0	0	0	0	1	3	3	3	0	0
5734	IZ858	0	0	1	1	1	3	1	3	1	3	3	3	1	3	3	3	2	3
5735	IZ860	0	0	1	1	0	0	0	0	0	0	0	0	1	3	3	3	0	0
5736	IZ863	0	0	2	1	0	0	0	0	0	0	0	0	1	1	3	3	0	0
5737	IZ864	0	0	1	1	0	0	0	0	0	0	0	0	1	3	3	3	0	0
5738	IZ866	0	0	1	1	0	0	0	0	0	0	0	0	1	3	3	3	0	0
5739	IZ868	0	0	2	1	0	0	1	3	0	0	0	0	1	3	3	3	0	0
5740	IZ870	0	0	2	1	0	0	3	3	0	0	0	0	1	1	3	3	0	0
5741	IZ874	0	0	1	1	0	0	1	1	1	1	3	3	3	3	1	3	3	3
5742	IZ878	0	0	2	1	0	0	1	3	0	0	0	0	1	3	3	3	2	3
5743	IZ881	0	0	1	1	0	0	3	3	0	0	0	0	1	1	3	3	2	3
5744	IZ883	0	0	2	1	0	0	1	3	1	3	3	3	1	3	3	3	2	3
5745	IZ884	0	0	2	1	0	0	1	3	0	0	0	0	1	3	3	3	2	3
5746	IZ886	0	0	1	1	0	0	1	3	0	0	0	0	1	3	3	3	2	3
5747	IZ887	0	0	2	1	0	0	3	3	0	0	0	0	1	1	3	3	2	2
5748	IZ889	0	0	1	1	0	0	1	3	1	3	3	3	1	1	3	3	2	2
5749	IZ890	0	0	1	1	0	0	3	3	3	3	3	3	1	1	3	3	2	2
5750	IZ891	0	0	2	1	0	0	1	3	1	3	1	3	1	3	1	3	2	3
5751	IZ893	0	0	2	1	0	0	3	3	3	3	3	3	1	1	3	3	2	2
5752	IZ895	0	0	1	1	0	0	1	3	0	0	0	0	1	3	3	3	2	3
5753	IZ897	0	0	1	1	0	0	3	3	0	0	0	0	1	1	1	3	2	2
5754	IZ898	0	0	1	1	0	0	1	3	0	0	0	0	1	3	3	3	2	3
5755	IZ900	0	0	2	1	0	0	3	3	0	0	0	0	1	1	1	3	0	0
5756	IZ901	0	0	2	1	0	0	1	3	0	0	0	0	1	3	3	3	0	0
5757	IZ902	0	0	2	1	1	3	0	0	0	0	0	0	3	3	3	3	3	3
5758	IZ903	0	0	1	1	0	0	3	3	0	0	3	3	1	1	3	3	2	2
5759	IZ905	0	0	1	1	0	0	1	1	1	1	3	3	3	3	3	3	3	3
5760	IZ906	0	0	1	1	0	0	1	3	0	0	0	0	1	3	3	3	2	3
5761	IZ907	0	0	2	1	0	0	3	3	3	3	1	3	1	1	1	3	2	2
5762	IZ908	0	0	2	1	0	0	3	3	0	0	0	0	1	1	3	3	2	3
5763	IZ909	0	0	2	1	0	0	1	3	0	0	0	0	1	3	3	3	2	3
5764	IZ910	0	0	1	1	0	0	3	3	3	3	3	3	1	1	3	3	2	2
5765	IZ911	0	0	2	1	0	0	1	3	1	3	3	3	1	3	3	3	3	3
5766	IZ912	0	0	2	1	0	0	1	3	1	3	3	3	1	3	3	3	2	3
5767	IZ913	0	0	2	1	0	0	3	3	3	3	3	3	1	1	3	3	2	2
5768	IZ914	0	0	1	1	0	0	1	1	1	1	3	3	3	3	3	3	3	3
5769	IZ917	0	0	2	1	0	0	3	3	3	3	0	0	1	1	3	3	2	2
5770	IZ918	0	0	2	1	0	0	1	1	1	1	0	0	3	3	3	3	3	3
5771	IZ921	0	0	2	1	0	0	0	0	0	0	0	0	1	3	1	1	3	3
5772	IZ922	0	0	2	1	0	0	3	3	0	0	0	0	1	1	1	3	2	2
5773	IZ925	0	0	2	1	0	0	1	3	1	3	0	0	1	1	3	3	2	3
5774	IZ926	0	0	2	1	0	0	3	3	3	3	0	0	1	3	3	3	2	2
5775	IZ927	0	0	1	1	0	0	1	3	1	3	0	0	1	3	3	3	2	3
5776	IZ928	0	0	1	1	0	0	1	3	1	3	0	0	1	3	1	3	3	3
5777	IZ929	0	0	2	1	1	3	0	0	0	0	0	0	1	3	0	0	2	3
5778	IZ933	0	0	1	1	0	0	3	3	0	0	0	0	1	1	3	3	2	2
5779	IZ934	0	0	1	1	0	0	3	3	3	3	0	0	1	1	3	3	2	3
5780	IZ935	0	0	1	1	0	0	1	3	1	3	0	0	1	3	3	3	2	3
5781	IZ937	0	0	1	1	0	0	3	3	3	3	0	0	1	1	1	3	2	2
5782	IZ938	0	0	2	1	0	0	3	3	3	3	0	0	1	1	3	3	0	0
5783	IZ939	0	0	1	1	0	0	1	3	0	0	0	0	1	3	0	0	3	3
5784	IZ942	0	0	1	1	0	0	1	3	1	3	3	3	0	0	3	3	0	0
5785	NC095	0	0	2	1	0	0	0	0	0	0	0	0	0	0	0	0	2	2
5786	NC096	0	0	2	1	0	0	0	0	0	0	0	0	0	0	0	0	2	2
5787	NC097	0	0	2	1	0	0	0	0	0	0	0	0	0	0	0	0	3	3
5788	NC098	0	0	2	1	0	0	0	0	0	0	0	0	0	0	0	0	2	2
5789	NC103	0	0	2	1	0	0	0	0	0	0	0	0	1	3	3	3	2	3
5790	NC106	0	0	2	1	0	0	0	0	0	0	0	0	0	0	1	3	3	3
5791	NC114	0	0	1	1	0	0	0	0	0	0	0	0	1	3	3	3	2	3
5792	NC117	0	0	2	1	0	0	0	0	0	0	0	0	1	3	1	3	2	3
5793	NC121	0	0	2	1	0	0	0	0	0	0	0	0	0	0	0	0	2	3
5794	NC125	0	0	2	1	0	0	0	0	0	0	0	0	1	3	3	3	2	3
5795	NC131	0	0	2	1	0	0	0	0	0	0	0	0	0	0	0	0	3	3
5796	NC135	0	0	2	1	0	0	0	0	0	0	0	0	0	0	0	0	2	3
5797	NC138	0	0	2	1	0	0	0	0	0	0	0	0	0	0	0	0	2	3
5798	NC146	0	0	1	1	0	0	0	0	0	0	0	0	0	0	0	0	2	3
5799	NC148	0	0	2	1	0	0	0	0	0	0	0	0	1	1	3	3	2	2
5800	NC151	0	0	2	1	0	0	0	0	0	0	0	0	1	1	3	3	2	3
5801	NC159	0	0	2	1	0	0	0	0	0	0	0	0	0	0	0	0	3	3
5802	NC163	0	0	1	1	0	0	0	0	0	0	0	0	1	1	3	3	2	2
5803	NC166	0	0	2	1	0	0	0	0	0	0	0	0	1	1	3	3	2	2
5804	NC174	0	0	2	1	0	0	0	0	0	0	0	0	1	1	0	0	2	2
5805	NC177	0	0	2	1	0	0	0	0	0	0	0	0	1	1	3	3	2	2
5806	NC180	0	0	2	1	0	0	0	0	0	0	0	0	0	0	0	0	3	3
5807	NC183	0	0	1	1	0	0	0	0	0	0	0	0	3	3	3	3	3	3
5808	NC189	0	0	1	1	0	0	0	0	0	0	0	0	1	3	1	3	2	3
5809	NC190	0	0	1	1	0	0	0	0	0	0	0	0	1	3	3	3	2	3
5810	NC191	0	0	2	1	0	0	0	0	0	0	0	0	1	3	3	3	2	3
5811	NC192	0	0	2	1	0	0	0	0	0	0	0	0	1	3	3	3	2	3
5812	NC195	0	0	1	1	0	0	0	0	0	0	0	0	0	0	0	0	2	3
5813	NC196	0	0	2	1	0	0	0	0	0	0	0	0	1	3	0	0	2	3
5814	NC199	0	0	2	1	0	0	0	0	0	0	0	0	0	0	0	0	2	2
5815	NC201	0	0	2	1	0	0	0	0	0	0	0	0	1	3	3	3	3	3
5816	NC205	0	0	2	1	0	0	0	0	0	0	0	0	3	3	3	3	3	3
5817	NC207	0	0	1	1	0	0	0	0	0	0	0	0	1	3	1	3	2	3
5818	NC210	0	0	1	1	0	0	0	0	0	0	0	0	1	3	3	3	2	3
5819	NC215	0	0	2	1	0	0	0	0	0	0	0	0	1	3	3	3	2	3
5820	NC216	0	0	2	1	0	0	0	0	0	0	0	0	1	1	3	3	2	2
5821	NC227	0	0	2	1	0	0	0	0	0	0	0	0	1	1	3	3	2	2
5822	NC229	0	0	2	1	0	0	0	0	0	0	0	0	1	3	3	3	2	3
5823	NC232	0	0	1	1	0	0	0	0	0	0	0	0	0	0	0	0	2	3
5824	NC236	0	0	2	1	0	0	0	0	0	0	0	0	1	1	3	3	2	2
5825	NC240	0	0	1	1	0	0	0	0	0	0	0	0	3	3	3	3	3	3
5826	NC244	0	0	2	1	0	0	0	0	0	0	0	0	0	0	0	0	2	3
5827	NC247	0	0	2	1	0	0	0	0	0	0	0	0	0	0	0	0	2	3
5828	NC250	0	0	2	1	0	0	0	0	0	0	0	0	1	3	3	3	2	3
5829	NC254	0	0	2	1	0	0	0	0	0	0	0	0	3	3	1	3	3	3
5830	NC257	0	0	1	1	0	0	0	0	0	0	0	0	1	3	3	3	2	3
5831	NC261	0	0	1	1	0	0	0	0	0	0	0	0	0	0	0	0	2	3
5832	NC264	0	0	1	1	0	0	0	0	0	0	0	0	1	3	3	3	2	3
5833	NC268	0	0	1	1	0	0	0	0	0	0	0	0	1	3	3	3	3	3
5834	NC270	0	0	2	1	0	0	0	0	0	0	0	0	3	3	3	3	3	3
5835	NC273	0	0	2	1	0	0	0	0	0	0	0	0	3	3	3	3	3	3
5836	NC287	0	0	1	1	0	0	0	0	0	0	0	0	1	3	3	3	2	3
5837	NC306	0	0	2	1	0	0	0	0	0	0	0	0	1	3	3	3	3	3
5838	NC312	0	0	2	1	0	0	0	0	0	0	0	0	0	0	3	3	2	2
5839	NC317	0	0	1	1	0	0	0	0	0	0	0	0	0	0	0	0	2	2
5840	NC319	0	0	2	1	0	0	0	0	0	0	0	0	3	3	1	3	3	3
5841	NC329	0	0	1	1	0	0	0	0	0	0	0	0	0	0	0	0	3	3
5842	NC339	0	0	2	1	0	0	0	0	0	0	0	0	1	3	3	3	2	3
5843	NC343	0	0	2	1	0	0	0	0	0	0	0	0	1	1	3	3	2	2
5844	NC354	0	0	2	1	0	0	0	0	0	0	0	0	1	1	3	3	2	2
5845	NC367	0	0	2	1	0	0	0	0	0	0	0	0	1	1	3	3	2	2
5846	NC370	0	0	1	1	0	0	0	0	0	0	0	0	1	3	3	3	2	3
5847	NC376	0	0	2	1	0	0	0	0	0	0	0	0	1	3	3	3	2	3
5848	NC381	0	0	1	1	0	0	0	0	0	0	0	0	0	0	0	0	3	3
5849	NC385	0	0	2	1	0	0	0	0	0	0	0	0	1	1	3	3	2	2
5850	NC387	0	0	2	1	0	0	0	0	0	0	0	0	3	3	3	3	3	3
5851	NC390	0	0	2	1	0	0	0	0	0	0	0	0	0	0	0	0	2	2
5852	NC396	0	0	2	1	0	0	0	0	0	0	0	0	0	0	0	0	2	3
5853	NC399	0	0	2	1	0	0	0	0	0	0	0	0	3	3	1	3	3	3
5854	NC402	0	0	2	1	0	0	0	0	0	0	0	0	1	3	3	3	2	3
5855	NC414	0	0	2	1	0	0	0	0	0	0	0	0	0	0	0	0	2	3
5856	NC416	0	0	2	1	0	0	0	0	0	0	0	0	1	3	3	3	2	3
5857	NC419	0	0	2	1	0	0	0	0	0	0	0	0	0	0	0	0	2	3
5858	NC424	0	0	2	1	0	0	0	0	0	0	0	0	1	3	3	3	2	3
5859	NC426	0	0	2	1	0	0	0	0	0	0	0	0	1	3	3	3	2	3
5860	NC429	0	0	2	1	0	0	0	0	0	0	0	0	0	0	0	0	2	2
5861	NC430	0	0	2	1	0	0	0	0	0	0	0	0	1	3	1	3	2	3
5862	NC432	0	0	2	1	0	0	0	0	0	0	0	0	1	1	3	3	2	2
5863	NC435	0	0	2	1	0	0	0	0	0	0	0	0	1	1	3	3	2	2
5864	NC439	0	0	2	1	0	0	0	0	0	0	0	0	0	0	3	3	2	3
5865	NC441	0	0	2	1	0	0	0	0	0	0	0	0	0	0	0	0	2	3
5866	NC446	0	0	2	1	0	0	0	0	0	0	0	0	1	3	3	3	2	3
5867	NC448	0	0	2	1	0	0	0	0	0	0	0	0	0	0	0	0	2	2
5868	NC449	0	0	2	1	0	0	0	0	0	0	0	0	0	0	0	0	3	3
5869	NC467	0	0	2	1	0	0	0	0	0	0	0	0	1	1	3	3	2	2
5870	NC469	0	0	1	1	0	0	0	0	0	0	0	0	0	0	3	3	2	2
5871	NC472	0	0	1	1	0	0	0	0	0	0	0	0	1	1	3	3	2	2
5872	NC482	0	0	2	1	0	0	0	0	0	0	0	0	1	3	3	3	2	3
5873	NC484	0	0	2	1	0	0	0	0	0	0	0	0	3	3	1	3	3	3
5874	NC495	0	0	1	1	0	0	0	0	0	0	0	0	1	3	3	3	2	3
5875	NC504	0	0	2	1	0	0	0	0	0	0	0	0	0	0	0	0	2	3
5876	NC508	0	0	2	1	0	0	0	0	0	0	0	0	0	0	0	0	2	3
5877	NC517	0	0	2	1	0	0	0	0	0	0	0	0	1	3	1	3	2	3
5878	NC518	0	0	1	1	0	0	0	0	0	0	0	0	0	0	0	0	3	3
5879	NC519	0	0	1	1	0	0	0	0	0	0	0	0	0	0	0	0	2	2
5880	NC522	0	0	2	1	0	0	0	0	0	0	0	0	1	1	3	3	2	3
5881	NC526	0	0	1	1	0	0	0	0	0	0	0	0	1	1	1	3	2	2
5882	NC527	0	0	1	1	0	0	0	0	0	0	0	0	3	3	3	3	3	3
5883	NC529	0	0	1	1	0	0	0	0	0	0	0	0	0	0	0	0	2	2
5884	NC530	0	0	1	1	0	0	0	0	0	0	0	0	1	1	3	3	2	2
5885	NC531	0	0	2	1	0	0	0	0	0	0	0	0	0	0	0	0	3	3
5886	NC532	0	0	1	1	0	0	0	0	0	0	0	0	1	3	3	3	2	3
5887	NC549	0	0	2	1	0	0	0	0	0	0	0	0	0	0	0	0	2	3
5888	NC563	0	0	2	1	0	0	0	0	0	0	0	0	3	3	3	3	3	3
5889	NC564	0	0	1	1	0	0	0	0	0	0	0	0	1	3	3	3	2	3
5890	NC565	0	0	2	1	0	0	0	0	0	0	0	0	1	3	0	0	2	3
5891	NC570	0	0	2	1	0	0	0	0	0	0	0	0	0	0	0	0	2	3
5892	NC574	0	0	1	1	0	0	0	0	0	0	0	0	1	1	3	3	2	2
5893	NC584	0	0	2	1	0	0	0	0	0	0	0	0	0	0	0	0	2	3
5894	NC588	0	0	1	1	0	0	0	0	0	0	0	0	1	3	3	3	2	3
5895	NC589	0	0	2	1	0	0	0	0	0	0	0	0	0	0	0	0	2	3
5896	RC123	0	0	2	1	0	0	1	3	0	0	0	0	1	3	1	3	2	3
5897	RC128	0	0	2	1	0	0	1	1	0	0	0	0	3	3	3	3	3	3
5898	RC135	0	0	2	1	0	0	1	3	0	0	0	0	1	3	3	3	2	3
5899	RC136	0	0	2	1	0	0	1	3	0	0	0	0	1	3	3	3	2	3
5900	RC141	0	0	2	1	0	0	3	3	0	0	0	0	1	1	3	3	2	2
5901	RC142	0	0	2	1	0	0	1	1	0	0	0	0	3	3	3	3	3	3
5902	RC143	0	0	2	1	0	0	1	3	0	0	0	0	1	3	3	3	2	3
5903	RC150	0	0	2	1	0	0	1	3	0	0	0	0	1	3	1	3	2	3
5904	RC154	0	0	1	1	0	0	3	3	0	0	0	0	1	1	3	3	2	2
5905	RC155	0	0	2	1	0	0	1	3	0	0	0	0	1	3	3	3	2	3
5906	RC158	0	0	2	1	0	0	3	3	0	0	0	0	1	1	3	3	2	2
5907	RC160	0	0	1	1	0	0	1	3	0	0	0	0	1	3	3	3	2	3
5908	RC161	0	0	1	1	0	0	0	0	0	0	0	0	1	1	1	3	2	3
5909	RC162	0	0	1	1	0	0	1	1	0	0	0	0	3	3	3	3	3	3
5910	RC163	0	0	2	1	0	0	1	3	0	0	0	0	1	3	3	3	2	3
5911	RC164	0	0	1	1	0	0	3	3	0	0	0	0	1	1	3	3	2	2
5912	RC168	0	0	1	1	0	0	1	3	0	0	0	0	1	3	3	3	2	3
5913	RC190	0	0	2	1	0	0	1	3	0	0	0	0	1	3	3	3	2	3
5914	RC191	0	0	2	1	0	0	1	1	0	0	0	0	3	3	1	3	3	3
5915	RC194	0	0	1	1	0	0	1	3	0	0	0	0	1	3	3	3	2	3
5916	RC195	0	0	2	1	0	0	1	1	0	0	0	0	3	3	1	3	3	3
5917	RC196	0	0	2	1	0	0	1	3	0	0	0	0	0	0	3	3	3	3
5918	RC199	0	0	2	1	0	0	3	3	0	0	0	0	1	1	3	3	2	2
5919	RC200	0	0	2	1	0	0	3	3	0	0	0	0	1	1	3	3	2	2
5920	RC201	0	0	2	1	0	0	1	3	0	0	0	0	1	3	3	3	2	3
5921	RC202	0	0	2	1	0	0	1	3	0	0	0	0	1	3	1	3	2	3
5922	RC203	0	0	2	1	0	0	1	3	0	0	0	0	1	3	3	3	2	3
5923	RC214	0	0	2	1	0	0	1	3	0	0	0	0	1	3	3	3	2	3
5924	RC215	0	0	2	1	0	0	1	1	0	0	0	0	3	3	3	3	3	3
5925	RC222	0	0	1	1	0	0	0	0	0	0	0	0	1	3	1	3	2	3
5926	RC229	0	0	1	1	0	0	1	3	0	0	0	0	1	3	3	3	2	3
5927	RC238	0	0	2	1	0	0	3	3	0	0	0	0	1	1	3	3	2	2
5928	RC243	0	0	1	1	0	0	3	3	0	0	0	0	1	1	3	3	2	2
5929	RC244	0	0	1	1	0	0	1	3	0	0	0	0	1	3	3	3	2	3
5930	RC245	0	0	1	1	0	0	1	3	0	0	0	0	1	3	3	3	2	3
5931	RC246	0	0	1	1	0	0	3	3	0	0	0	0	1	1	3	3	2	2
5932	RC249	0	0	1	1	0	0	1	3	0	0	0	0	1	3	3	3	2	3
5933	RC253	0	0	2	1	0	0	1	3	0	0	0	0	1	3	3	3	2	3
5934	RC254	0	0	1	1	0	0	1	3	0	0	0	0	1	3	3	3	2	3
5935	RC258	0	0	2	1	0	0	1	3	0	0	0	0	3	3	3	3	3	3
5936	RC261	0	0	2	1	0	0	1	3	0	0	0	0	1	3	3	3	2	3
5937	RC266	0	0	1	1	0	0	1	3	0	0	0	0	1	3	3	3	2	3
5938	RC268	0	0	1	1	0	0	1	3	0	0	0	0	1	3	1	3	2	3
5939	RC274	0	0	1	1	0	0	3	3	0	0	0	0	1	1	3	3	2	2
5940	RC278	0	0	1	1	0	0	3	3	0	0	0	0	1	1	3	3	2	2
5941	RC279	0	0	1	1	0	0	3	3	0	0	0	0	1	1	1	3	2	2
5942	RC282	0	0	1	1	0	0	0	0	0	0	0	0	1	3	3	3	2	3
5943	RC286	0	0	1	1	0	0	0	0	0	0	0	0	1	3	3	3	2	3
5944	RC287	0	0	2	1	0	0	0	0	0	0	0	0	1	3	3	3	2	3
5945	RC288	0	0	1	1	0	0	0	0	0	0	0	0	3	3	3	3	3	3
5946	RC291	0	0	2	1	0	0	0	0	0	0	0	0	1	1	3	3	2	2
5947	RC293	0	0	1	1	0	0	0	0	0	0	0	0	3	3	3	3	3	3
5948	RC300	0	0	1	1	0	0	0	0	0	0	0	0	1	3	3	3	2	3
5949	RC311	0	0	1	1	0	0	0	0	0	0	0	0	1	3	1	3	2	3
5950	RC318	0	0	1	1	0	0	0	0	0	0	0	0	3	3	3	3	3	3
5951	RC319	0	0	1	1	0	0	0	0	0	0	0	0	1	3	3	3	3	3
5952	RC322	0	0	1	1	0	0	0	0	0	0	0	0	1	1	3	3	2	2
5953	RC323	0	0	1	1	0	0	0	0	0	0	0	0	1	1	3	3	2	2
5954	RC336	0	0	1	1	0	0	0	0	0	0	0	0	1	1	3	3	2	2
5955	RC343	0	0	1	1	0	0	0	0	0	0	0	0	1	1	3	3	2	2
5956	RC344	0	0	1	1	0	0	0	0	0	0	0	0	1	3	3	3	2	3
5957	RC348	0	0	1	1	0	0	0	0	0	0	0	0	1	3	1	3	2	3
5958	RC351	0	0	1	1	0	0	0	0	0	0	0	0	1	1	3	3	2	2
5959	RC356	0	0	1	1	0	0	0	0	0	0	0	0	1	1	3	3	2	2
5960	RC362	0	0	1	1	0	0	0	0	0	0	0	0	1	3	3	3	2	3
5961	RC363	0	0	1	1	0	0	0	0	0	0	0	0	1	1	3	3	2	2
5962	RC366	0	0	1	1	0	0	0	0	0	0	0	0	3	3	1	3	3	3
5963	RC369	0	0	1	1	0	0	0	0	0	0	0	0	1	1	3	3	2	2
5964	RC370	0	0	1	1	0	0	0	0	0	0	0	0	1	1	3	3	2	2
5965	RC372	0	0	1	1	0	0	0	0	0	0	0	0	1	3	3	3	2	3
5966	RC374	0	0	1	1	0	0	0	0	0	0	0	0	3	3	1	3	3	3
5967	RC376	0	0	1	1	0	0	0	0	0	0	0	0	1	1	3	3	2	2
5968	RC379	0	0	1	1	0	0	0	0	0	0	0	0	1	3	1	3	2	3
5969	RC380	0	0	1	1	0	0	0	0	0	0	0	0	1	1	3	3	2	2
5970	RC381	0	0	2	1	0	0	0	0	0	0	0	0	1	3	3	3	2	3
5971	RC385	0	0	1	1	0	0	0	0	0	0	0	0	1	1	3	3	2	2
5972	RC391	0	0	2	1	0	0	3	3	0	0	0	0	1	1	3	3	2	2
5973	RC394	0	0	1	1	0	0	3	3	0	0	0	0	1	1	3	3	2	2
5974	RC396	0	0	1	1	0	0	1	1	0	0	0	0	3	3	1	3	3	3
5975	RC401	0	0	1	1	0	0	3	3	0	0	0	0	1	1	3	3	2	2
5976	RC408	0	0	1	1	0	0	1	1	0	0	0	0	3	3	3	3	3	3
5977	RC410	0	0	2	1	0	0	1	3	0	0	0	0	1	3	3	3	2	3
5978	RC414	0	0	1	1	0	0	1	1	0	0	0	0	3	3	3	3	3	3
5979	RC416	0	0	2	1	0	0	1	3	0	0	0	0	1	3	3	3	2	3
5980	RC422	0	0	1	1	0	0	3	3	0	0	0	0	1	1	3	3	2	2
5981	RC423	0	0	1	1	0	0	3	3	0	0	0	0	1	1	3	3	2	2
5982	RC427	0	0	1	1	0	0	3	3	0	0	0	0	1	1	3	3	2	2
5983	RC428	0	0	1	1	0	0	3	3	0	0	0	0	1	1	3	3	2	2
5984	RC431	0	0	1	1	0	0	0	0	0	0	0	0	1	3	3	3	2	3
5985	RC435	0	0	1	1	0	0	3	3	0	0	0	0	1	1	1	3	2	2
5986	RC437	0	0	1	1	0	0	1	3	0	0	0	0	1	3	3	3	2	3
5987	SA102	0	0	2	1	3	3	1	3	1	3	3	3	1	3	3	3	2	3
5988	SA103	0	0	2	1	3	3	3	3	3	3	3	3	1	1	3	3	2	2
5989	SA106	0	0	2	1	1	1	1	1	1	1	3	3	3	3	3	3	3	3
5990	SA107	0	0	2	1	1	1	1	1	1	1	3	3	3	3	3	3	3	3
5991	SA108	0	0	1	1	3	3	3	3	3	3	3	3	1	1	3	3	2	2
5992	SA109	0	0	1	1	3	3	1	3	1	3	3	3	1	3	3	3	2	3
5993	SA110	0	0	1	1	3	3	3	3	3	3	3	3	1	1	3	3	2	2
5994	SA111	0	0	2	1	3	3	3	3	3	3	3	3	1	1	3	3	2	2
5995	SA113	0	0	1	1	1	3	1	3	1	3	3	3	1	3	3	3	2	3
5996	SA114	0	0	1	1	1	3	1	3	1	3	3	3	1	3	3	3	3	3
5997	SA115	0	0	1	1	3	3	3	3	3	3	3	3	1	1	3	3	2	2
5998	SA116	0	0	2	1	1	3	1	3	1	3	3	3	1	3	3	3	2	3
5999	SA117	0	0	2	1	3	3	3	3	3	3	3	3	1	1	3	3	2	2
6000	SA118	0	0	2	1	3	3	3	3	3	3	3	3	1	1	3	3	2	3
6001	SA121	0	0	1	1	3	3	3	3	3	3	3	3	1	1	3	3	2	2
6002	SA122	0	0	1	1	1	3	1	3	1	3	3	3	3	3	3	3	3	3
6003	SA123	0	0	1	1	3	3	1	3	1	3	3	3	1	3	3	3	2	3
6004	SA124	0	0	1	1	3	3	1	3	1	3	3	3	1	3	3	3	3	3
6005	SA125	0	0	2	1	1	3	1	3	1	3	3	3	1	3	3	3	2	3
6006	SA126	0	0	2	1	3	3	3	3	3	3	3	3	1	1	3	3	2	2
6007	SA127	0	0	2	1	3	3	3	3	3	3	3	3	1	1	3	3	2	2
6008	SA128	0	0	2	1	3	3	3	3	3	3	3	3	1	1	3	3	2	2
6009	SA129	0	0	1	1	3	3	1	3	1	3	3	3	1	3	3	3	2	3
6010	SA130	0	0	1	1	3	3	3	3	3	3	3	3	1	1	3	3	2	2
6011	SA131	0	0	1	1	3	3	1	1	1	1	3	3	3	3	1	3	3	3
6012	SA132	0	0	1	1	3	3	1	1	1	1	3	3	3	3	1	3	3	3
6013	SA133	0	0	1	1	3	3	3	3	3	3	3	3	1	1	3	3	2	2
6014	SA134	0	0	2	1	1	3	1	1	1	1	3	3	3	3	3	3	3	3
6015	SA135	0	0	1	1	3	3	1	3	1	3	3	3	1	3	3	3	2	3
6016	SA136	0	0	2	1	3	3	1	1	1	1	3	3	3	3	3	3	3	3
6017	SA137	0	0	1	1	1	3	3	3	3	3	1	3	1	1	1	3	2	2
6018	SA138	0	0	2	1	3	3	3	3	3	3	3	3	1	1	3	3	2	2
6019	SA139	0	0	1	1	3	3	3	3	3	3	3	3	1	1	3	3	2	2
6020	SA140	0	0	1	1	1	3	1	1	1	1	3	3	3	3	3	3	3	3
6021	SA141	0	0	1	1	1	3	1	1	1	1	3	3	3	3	3	3	3	3
6022	SA142	0	0	2	1	1	3	1	1	1	1	3	3	3	3	3	3	3	3
6023	SA143	0	0	2	1	1	3	1	3	1	3	3	3	3	3	3	3	3	3
6024	SA144	0	0	2	1	3	3	3	3	3	3	3	3	1	1	3	3	2	2
6025	SA148	0	0	2	1	3	3	1	3	1	3	3	3	1	3	3	3	2	3
6026	SA150	0	0	2	1	3	3	1	3	0	0	3	3	1	3	1	3	2	3
6027	SA151	0	0	1	1	3	3	1	3	1	3	3	3	1	3	3	3	2	3
6028	SA152	0	0	1	1	3	3	1	3	1	3	3	3	1	3	3	3	2	3
6029	SA153	0	0	2	1	3	3	1	1	1	1	3	3	3	3	1	3	3	3
6030	SA154	0	0	2	1	1	3	1	3	1	3	3	3	1	3	3	3	2	3
6031	SA155	0	0	2	1	3	3	1	3	1	3	3	3	1	3	3	3	2	3
6032	SA156	0	0	1	1	3	3	1	3	1	3	3	3	1	3	3	3	2	3
6033	SA157	0	0	1	1	3	3	3	3	3	3	1	3	1	1	3	3	2	2
6034	SA158	0	0	1	1	1	1	1	1	1	1	3	3	3	3	3	3	3	3
6035	SA159	0	0	2	1	3	3	1	3	1	3	3	3	1	3	1	3	2	3
6036	SA160	0	0	2	1	3	3	3	3	3	3	3	3	1	1	3	3	2	2
6037	SA161	0	0	2	1	1	3	1	3	1	3	3	3	1	3	3	3	2	3
6038	SA162	0	0	1	1	1	3	1	3	1	3	3	3	1	3	3	3	3	3
6039	SA163	0	0	2	1	3	3	1	3	1	3	3	3	1	3	1	3	2	3
6040	SA164	0	0	1	1	1	3	1	3	1	3	3	3	1	3	3	3	2	3
6041	SA165	0	0	1	1	3	3	1	3	1	3	3	3	1	3	3	3	2	3
6042	SA166	0	0	2	1	3	3	1	3	1	3	3	3	1	3	3	3	2	3
6043	SA167	0	0	1	1	3	3	1	1	1	1	3	3	3	3	3	3	3	3
6044	SA168	0	0	1	1	1	3	1	3	1	3	3	3	3	3	1	3	3	3
6045	SA169	0	0	1	1	3	3	3	3	3	3	3	3	1	1	3	3	2	2
6046	SA171	0	0	1	1	1	3	1	1	1	1	3	3	3	3	3	3	3	3
6047	SA172	0	0	1	1	3	3	3	3	3	3	3	3	1	1	3	3	2	2
6048	SA173	0	0	1	1	1	1	1	3	0	0	3	3	1	3	3	3	2	3
6049	SA174	0	0	1	1	3	3	3	3	3	3	1	3	1	1	1	3	2	2
6050	SA175	0	0	2	1	3	3	1	1	1	1	3	3	3	3	1	3	3	3
6051	SA176	0	0	1	1	3	3	1	3	1	3	3	3	1	3	3	3	2	3
6052	SA177	0	0	2	1	3	3	3	3	3	3	3	3	1	1	3	3	2	2
6053	SA178	0	0	1	1	3	3	1	1	1	1	3	3	3	3	3	3	3	3
6054	SA179	0	0	2	1	3	3	1	3	1	3	3	3	1	3	3	3	2	3
6055	SA180	0	0	2	1	1	3	1	3	1	3	3	3	1	3	3	3	2	3
6056	SA181	0	0	2	1	3	3	1	3	1	3	3	3	1	3	3	3	2	3
6057	SA182	0	0	2	1	1	3	1	3	1	3	3	3	1	3	3	3	2	3
6058	SA183	0	0	1	1	3	3	3	3	3	3	3	3	1	1	3	3	2	3
6059	SA185	0	0	1	1	3	3	1	3	1	3	3	3	1	3	3	3	2	3
6060	SA186	0	0	1	1	3	3	3	3	3	3	3	3	1	1	3	3	2	2
6061	SA187	0	0	1	1	1	3	1	1	1	1	3	3	3	3	3	3	3	3
6062	SA188	0	0	2	1	3	3	3	3	3	3	3	3	1	1	3	3	2	2
6063	SA194	0	0	1	1	3	3	3	3	3	3	3	3	1	1	3	3	2	2
6064	SA195	0	0	1	1	1	3	1	3	1	3	3	3	1	3	3	3	2	3
6065	SA196	0	0	1	1	1	3	1	3	1	3	3	3	1	3	3	3	2	3
6066	SA199	0	0	2	1	3	3	1	1	1	1	3	3	3	3	3	3	3	3
6067	SA200	0	0	1	1	1	3	1	1	1	1	3	3	3	3	3	3	3	3
6068	SA201	0	0	1	1	3	3	3	3	3	3	3	3	1	1	3	3	2	2
6069	SA202	0	0	1	1	3	3	3	3	3	3	3	3	1	1	3	3	2	2
6070	SA204	0	0	1	1	3	3	1	3	1	3	3	3	1	3	3	3	2	3
6071	SA205	0	0	2	1	3	3	3	3	3	3	3	3	1	1	3	3	2	2
6072	SA206	0	0	2	1	3	3	1	3	1	3	3	3	1	3	1	3	3	3
6073	SA207	0	0	2	1	1	3	3	3	3	3	1	3	1	1	1	3	2	2
6074	SA208	0	0	2	1	3	3	1	1	1	1	3	3	3	3	1	3	3	3
6075	SA209	0	0	2	1	1	3	1	3	1	3	3	3	1	3	3	3	2	3
6076	SA210	0	0	2	1	1	3	3	3	3	3	1	3	1	1	0	0	2	2
6077	SA211	0	0	2	1	1	3	1	3	1	3	3	3	1	3	3	3	2	3
6078	SA212	0	0	2	1	3	3	1	3	1	3	3	3	1	3	3	3	2	3
6079	SA213	0	0	2	1	3	3	1	3	1	3	3	3	1	3	0	0	2	3
6080	SA215	0	0	2	1	1	3	1	3	1	3	3	3	1	3	3	3	2	3
6081	SA216	0	0	2	1	1	3	1	3	1	3	1	3	1	3	1	3	2	3
6082	SA218	0	0	1	1	3	3	3	3	3	3	3	3	1	1	3	3	2	3
6083	SA219	0	0	1	1	3	3	3	3	3	3	3	3	1	1	3	3	2	2
6084	SA226	0	0	1	1	1	3	1	3	0	0	3	3	1	3	3	3	2	3
6085	SA229	0	0	1	1	1	3	1	1	1	1	3	3	3	3	3	3	3	3
6086	SA230	0	0	2	1	3	3	1	1	1	1	3	3	3	3	3	3	3	3
6087	SA231	0	0	2	1	3	3	1	3	1	3	3	3	1	3	3	3	2	3
6088	SA232	0	0	1	1	1	1	1	1	1	1	3	3	3	3	3	3	3	3
6089	SA233	0	0	1	1	1	3	1	1	1	1	3	3	3	3	3	3	3	3
6090	SA234	0	0	2	1	1	3	3	3	3	3	1	3	1	1	1	3	2	2
6091	SA236	0	0	1	1	3	3	1	3	1	3	3	3	1	3	3	3	2	3
6092	SA238	0	0	2	1	3	3	3	3	3	3	3	3	1	1	3	3	2	2
6093	SA240	0	0	1	1	3	3	1	3	1	3	3	3	1	3	3	3	2	3
6094	SA242	0	0	2	1	3	3	1	1	1	1	3	3	3	3	3	3	3	3
6095	SA243	0	0	2	1	3	3	1	1	1	1	3	3	3	3	1	3	3	3
6096	SA244	0	0	1	1	3	3	1	3	1	3	3	3	1	3	3	3	2	3
6097	SA247	0	0	2	1	1	3	1	1	1	1	3	3	3	3	3	3	3	3
6098	SA248	0	0	2	1	1	3	1	3	1	3	3	3	1	3	3	3	3	3
6099	SA249	0	0	1	1	3	3	3	3	3	3	3	3	1	1	3	3	2	3
6100	SA251	0	0	2	1	3	3	1	3	1	3	3	3	1	3	3	3	2	3
6101	SA252	0	0	2	1	1	3	1	3	1	3	3	3	1	3	3	3	2	3
6102	SA253	0	0	2	1	3	3	1	1	1	1	3	3	3	3	3	3	3	3
6103	SA254	0	0	1	1	3	3	1	3	1	3	3	3	1	3	3	3	2	3
6104	SA255	0	0	2	1	3	3	3	3	3	3	3	3	1	1	3	3	2	2
6105	SA264	0	0	1	1	3	3	3	3	3	3	3	3	1	1	3	3	2	2
6106	SA267	0	0	2	1	3	3	3	3	3	3	1	3	1	1	1	3	2	2
6107	SA272	0	0	2	1	3	3	0	0	3	3	1	3	1	1	3	3	0	0
6108	SA277	0	0	2	1	3	3	3	3	3	3	3	3	1	1	3	3	2	2
6109	SA280	0	0	1	1	3	3	3	3	3	3	3	3	1	1	1	3	2	2
6110	SA281	0	0	2	1	3	3	1	3	1	3	3	3	1	3	1	3	2	3
6111	SA282	0	0	2	1	3	3	1	3	1	3	3	3	1	3	1	3	2	3
6112	SA283	0	0	2	1	3	3	3	3	3	3	3	3	1	1	3	3	2	3
6113	SA285	0	0	2	1	3	3	1	3	1	3	3	3	1	3	3	3	2	3
6114	SA286	0	0	2	1	3	3	3	3	3	3	1	3	1	1	1	3	2	2
6115	SA288	0	0	2	1	3	3	3	3	3	3	3	3	1	1	3	3	2	2
6116	SA322	0	0	1	1	3	3	1	1	1	1	3	3	3	3	3	3	3	3
6117	SA323	0	0	1	1	1	3	1	3	1	3	3	3	1	3	3	3	2	3
6118	SA325	0	0	2	1	1	3	1	3	1	3	3	3	1	3	3	3	2	3
6119	SA326	0	0	2	1	3	3	1	3	1	3	3	3	1	3	3	3	2	3
6120	SA327	0	0	2	1	3	3	1	3	1	3	3	3	1	3	1	3	2	3
6121	SA328	0	0	1	1	3	3	3	3	3	3	3	3	1	1	3	3	2	2
6122	SA329	0	0	2	1	3	3	3	3	3	3	3	3	1	1	3	3	2	2
6123	SA334	0	0	2	1	3	3	3	3	3	3	1	3	1	1	1	3	2	2
6124	SA335	0	0	2	1	3	3	3	3	3	3	3	3	1	1	3	3	2	2
6125	SA336	0	0	2	1	3	3	1	3	1	3	3	3	1	3	3	3	2	3
6126	SA338	0	0	2	1	1	3	1	3	1	3	3	3	1	3	3	3	2	3
6127	SA340	0	0	2	1	3	3	1	3	1	3	3	3	1	3	3	3	3	3
6128	SA342	0	0	1	1	3	3	1	1	1	1	3	3	3	3	1	3	3	3
6129	SA343	0	0	2	1	3	3	1	1	1	1	3	3	3	3	3	3	3	3
6130	SA344	0	0	2	1	1	3	1	3	1	3	3	3	1	3	3	3	3	3
6131	SA345	0	0	1	1	3	3	3	3	3	3	3	3	1	1	3	3	2	2
6132	SA346	0	0	2	1	3	3	1	3	1	3	1	3	1	3	1	3	2	3
6133	SA347	0	0	1	1	3	3	1	1	1	1	3	3	3	3	3	3	3	3
6134	SA350	0	0	2	1	1	3	1	3	1	3	3	3	1	3	3	3	2	3
6135	SA351	0	0	1	1	3	3	1	1	1	1	3	3	3	3	1	1	3	3
6136	SA354	0	0	2	1	3	3	3	3	3	3	3	3	1	1	3	3	2	2
6137	SA358	0	0	2	1	3	3	1	3	1	3	3	3	1	3	3	3	2	3
6138	SA501	0	0	2	1	3	3	1	3	1	3	3	3	1	3	3	3	2	3
6139	SA502	0	0	1	1	1	3	1	3	1	3	3	3	1	3	3	3	2	3
6140	SA503	0	0	1	1	3	3	3	3	3	3	3	3	1	1	3	3	2	3
6141	SA504	0	0	2	1	3	3	3	3	3	3	3	3	1	1	3	3	2	3
6142	SA505	0	0	2	1	3	3	3	3	3	3	1	3	1	1	3	3	2	2
6143	SA506	0	0	2	1	3	3	3	3	3	3	3	3	1	1	3	3	2	2
6144	SA507	0	0	2	1	3	3	3	3	3	3	1	3	1	1	3	3	2	3
6145	SA508	0	0	1	1	3	3	3	3	3	3	3	3	1	1	3	3	2	2
6146	SA509	0	0	2	1	3	3	3	3	3	3	3	3	1	1	3	3	2	2
6147	SA510	0	0	2	1	3	3	3	3	3	3	3	3	1	1	3	3	2	3
6148	SA511	0	0	2	1	3	3	1	1	1	1	3	3	3	3	3	3	3	3
6149	SA512	0	0	2	1	3	3	3	3	3	3	3	3	1	1	3	3	3	3
6150	SA513	0	0	2	1	1	3	1	3	1	3	3	3	1	3	3	3	2	3
6151	SA514	0	0	2	1	3	3	1	3	1	3	3	3	1	3	3	3	2	3
6152	SA515	0	0	2	1	3	3	1	3	1	3	3	3	1	3	3	3	2	3
6153	SA516	0	0	2	1	3	3	3	3	3	3	3	3	1	1	3	3	2	3
6154	SA517	0	0	2	1	3	3	1	3	1	3	3	3	1	3	1	3	2	3
6155	SA518	0	0	2	1	3	3	3	3	3	3	3	3	1	1	3	3	2	2
6156	SA519	0	0	2	1	3	3	3	3	3	3	3	3	1	1	3	3	2	3
6157	SA520	0	0	2	1	3	3	3	3	3	3	3	3	1	1	3	3	2	2
6158	SA521	0	0	2	1	3	3	3	3	3	3	3	3	1	1	3	3	2	2
6159	SA522	0	0	2	1	3	3	1	3	1	3	3	3	1	3	3	3	2	3
6160	SA523	0	0	2	1	1	3	1	3	1	3	3	3	3	3	3	3	3	3
6161	SA524	0	0	2	1	3	3	3	3	3	3	3	3	1	1	3	3	2	2
6162	SA525	0	0	2	1	3	3	1	3	1	3	1	3	1	3	1	3	2	3
6163	SA526	0	0	2	1	1	3	1	1	1	1	3	3	3	3	3	3	3	3
6164	SA527	0	0	2	1	3	3	3	3	3	3	3	3	1	1	3	3	2	2
6165	SA528	0	0	2	1	1	3	1	3	1	3	3	3	1	3	3	3	2	3
6166	SA529	0	0	2	1	3	3	1	3	1	3	3	3	1	3	1	3	2	3
6167	SA530	0	0	2	1	3	3	3	3	3	3	3	3	1	1	3	3	2	2
6168	SA531	0	0	1	1	3	3	3	3	3	3	3	3	1	1	3	3	2	2
6169	SA532	0	0	2	1	1	1	1	3	1	3	1	3	1	3	1	3	2	3
6170	SA533	0	0	1	1	3	3	3	3	3	3	3	3	1	1	3	3	2	3
6171	SA534	0	0	2	1	1	1	1	1	1	1	3	3	3	3	3	3	3	3
6172	SA535	0	0	2	1	1	3	1	3	1	3	3	3	1	3	3	3	2	3
6173	SA536	0	0	2	1	3	3	3	3	3	3	3	3	1	1	3	3	2	2
6174	SA537	0	0	2	1	3	3	3	3	3	3	1	3	1	3	1	3	2	3
6175	SA538	0	0	2	1	3	3	3	3	3	3	1	3	1	1	1	3	2	2
6176	SA539	0	0	2	1	3	3	3	3	3	3	3	3	1	1	3	3	2	2
6177	SA540	0	0	2	1	1	3	1	3	1	3	3	3	1	3	3	3	2	3
6178	SA541	0	0	2	1	1	1	1	1	1	1	3	3	3	3	3	3	3	3
6179	SA542	0	0	2	1	1	3	1	3	1	3	3	3	1	3	3	3	2	3
6180	SA543	0	0	1	1	3	3	1	3	1	3	3	3	1	3	3	3	2	3
6181	SA544	0	0	2	1	3	3	3	3	3	3	3	3	1	1	3	3	2	2
6182	SA545	0	0	1	1	3	3	1	1	1	1	3	3	3	3	1	3	3	3
6183	SA546	0	0	1	1	3	3	1	3	1	3	3	3	1	3	3	3	2	3
6184	SA547	0	0	1	1	3	3	3	3	3	3	3	3	1	1	3	3	2	2
6185	SA548	0	0	1	1	1	3	1	1	1	1	3	3	3	3	3	3	3	3
6186	SA549	0	0	2	1	1	3	1	3	1	3	3	3	1	3	3	3	2	3
6187	SA550	0	0	1	1	3	3	1	3	1	3	3	3	1	3	1	3	2	3
6188	SA551	0	0	1	1	3	3	3	3	3	3	3	3	1	1	3	3	2	2
6189	SA552	0	0	1	1	3	3	3	3	3	3	3	3	1	1	3	3	2	2
6190	SA553	0	0	1	1	3	3	1	3	1	3	3	3	1	3	1	3	2	3
6191	SA554	0	0	2	1	1	3	1	3	1	3	3	3	1	3	3	3	2	3
6192	SA555	0	0	1	1	1	1	1	1	1	1	3	3	3	3	3	3	3	3
6193	SA556	0	0	1	1	1	3	1	3	1	3	3	3	3	3	3	3	3	3
6194	SA557	0	0	2	1	3	3	1	3	1	3	3	3	3	3	3	3	3	3
6195	SA558	0	0	2	1	1	1	1	1	1	1	3	3	3	3	3	3	3	3
6196	SA559	0	0	1	1	3	3	3	3	3	3	3	3	1	1	3	3	2	2
6197	SA560	0	0	2	1	3	3	3	3	3	3	3	3	1	1	3	3	2	2
6198	SA561	0	0	2	1	3	3	1	3	1	3	3	3	1	3	3	3	2	3
6199	SA562	0	0	2	1	3	3	3	3	3	3	1	3	1	1	1	3	2	2
6200	SA563	0	0	1	1	3	3	1	3	1	3	3	3	1	3	3	3	2	3
6201	SA564	0	0	2	1	1	3	1	3	1	3	3	3	1	3	3	3	2	3
6202	SA565	0	0	2	1	1	1	1	3	1	3	1	3	1	3	1	3	2	3
6203	SA566	0	0	1	1	3	3	1	3	1	3	3	3	1	3	1	3	2	3
6204	SA567	0	0	1	1	3	3	3	3	3	3	3	3	1	1	3	3	2	3
6205	SA568	0	0	1	1	3	3	3	3	3	3	3	3	1	1	3	3	2	2
6206	SA569	0	0	2	1	1	3	1	3	1	3	3	3	1	3	3	3	2	3
6207	SA570	0	0	2	1	3	3	1	3	1	3	1	3	1	3	3	3	2	3
6208	SA571	0	0	2	1	1	1	1	1	1	1	3	3	3	3	3	3	3	3
6209	SA572	0	0	1	1	3	3	1	3	1	3	3	3	1	3	3	3	2	3
6210	SA573	0	0	2	1	3	3	3	3	3	3	3	3	1	1	3	3	2	2
6211	SA574	0	0	2	1	3	3	3	3	3	3	3	3	1	1	3	3	2	2
6212	SA575	0	0	2	1	1	3	1	1	1	1	3	3	3	3	3	3	3	3
6213	SA576	0	0	1	1	1	3	1	3	1	3	3	3	1	3	3	3	2	3
6214	SA577	0	0	1	1	3	3	1	3	1	3	3	3	1	3	3	3	2	3
6215	SA578	0	0	1	1	3	3	1	3	1	3	3	3	1	3	3	3	2	3
6216	SA579	0	0	2	1	1	3	1	3	1	3	3	3	1	3	3	3	2	3
6217	SA580	0	0	2	1	3	3	1	3	1	3	3	3	1	3	1	3	2	3
6218	SA581	0	0	1	1	1	3	1	1	1	1	3	3	3	3	3	3	3	3
6219	SA582	0	0	1	1	3	3	3	3	3	3	0	0	1	1	3	3	2	2
6220	SA583	0	0	2	1	1	3	1	3	1	3	3	3	1	3	3	3	2	3
6221	SA584	0	0	2	1	3	3	1	1	1	1	3	3	3	3	1	3	3	3
6222	SA585	0	0	2	1	1	3	1	3	1	3	3	3	1	3	3	3	3	3
6223	SA586	0	0	2	1	1	3	1	3	1	3	3	3	1	3	3	3	2	3
6224	SA587	0	0	1	1	1	3	1	3	1	3	3	3	1	3	3	3	2	3
6225	SA588	0	0	2	1	3	3	1	3	1	3	3	3	1	3	3	3	2	3
6226	SA589	0	0	2	1	1	3	1	1	1	1	3	3	3	3	3	3	3	3
6227	SA590	0	0	2	1	3	3	3	3	3	3	3	3	1	1	3	3	2	2
6228	SA591	0	0	2	1	3	3	3	3	3	3	3	3	1	1	3	3	2	2
6229	SA592	0	0	2	1	3	3	3	3	3	3	3	3	1	1	3	3	2	2
6230	SA593	0	0	1	1	3	3	1	3	1	3	3	3	1	3	3	3	2	3
6231	SA594	0	0	1	1	3	3	1	3	1	3	3	3	1	3	1	3	2	3
6232	SA595	0	0	2	1	1	1	1	3	1	3	1	3	1	3	1	1	2	3
6233	SA596	0	0	1	1	3	3	1	3	1	3	3	3	1	3	3	3	2	3
6234	SA597	0	0	1	1	3	3	3	3	3	3	3	3	1	1	3	3	2	3
6235	SA598	0	0	2	1	3	3	1	1	1	1	3	3	3	3	3	3	3	3
6236	SA599	0	0	1	1	3	3	1	3	1	3	3	3	1	3	3	3	2	3
6237	SA600	0	0	2	1	3	3	3	3	3	3	3	3	1	1	3	3	2	2
6238	SA601	0	0	2	1	3	3	3	3	3	3	3	3	1	1	3	3	2	2
6239	SA602	0	0	2	1	3	3	1	3	1	3	3	3	1	3	1	3	2	3
6240	SA603	0	0	2	1	3	3	3	3	3	3	3	3	1	1	3	3	2	2
6241	SA604	0	0	2	1	3	3	1	1	1	1	3	3	3	3	3	3	3	3
6242	SA605	0	0	1	1	3	3	1	3	1	3	3	3	1	3	3	3	2	3
6243	SA606	0	0	1	1	1	1	1	1	1	1	3	3	3	3	3	3	3	3
6244	SA607	0	0	2	1	1	3	3	3	3	3	3	3	1	1	3	3	2	3
6245	SA608	0	0	1	1	1	3	1	1	1	1	3	3	3	3	3	3	3	3
6246	SA609	0	0	2	1	3	3	1	3	1	3	3	3	1	3	3	3	2	3
6247	SA610	0	0	2	1	3	3	3	3	3	3	3	3	1	1	3	3	2	2
6248	SA611	0	0	2	1	1	3	1	3	1	3	3	3	1	3	3	3	2	3
6249	SA612	0	0	2	1	3	3	1	1	1	1	3	3	3	3	3	3	3	3
6250	SA613	0	0	1	1	3	3	1	3	1	3	3	3	1	3	1	3	2	3
6251	SA614	0	0	2	1	3	3	3	3	3	3	3	3	1	1	3	3	2	2
6252	SA615	0	0	2	1	1	3	1	3	1	3	3	3	1	3	3	3	2	3
6253	SA616	0	0	1	1	3	3	3	3	3	3	3	3	1	1	3	3	2	2
6254	SA617	0	0	2	1	3	3	3	3	3	3	3	3	1	1	3	3	2	2
6255	SA618	0	0	1	1	3	3	1	1	1	1	3	3	3	3	1	3	3	3
6256	SA619	0	0	1	1	3	3	1	3	1	3	3	3	1	3	3	3	2	3
6257	SA620	0	0	2	1	3	3	3	3	3	3	3	3	1	1	3	3	2	2
6258	SA621	0	0	1	1	3	3	3	3	3	3	3	3	1	3	3	3	2	2
6259	SA622	0	0	2	1	1	3	1	3	1	3	3	3	1	3	3	3	2	3
6260	SA623	0	0	2	1	1	3	1	3	1	3	3	3	1	3	1	3	2	3
6261	SA624	0	0	2	1	1	3	1	3	1	3	3	3	1	3	3	3	2	3
6262	SA625	0	0	1	1	1	3	1	3	1	3	3	3	1	3	3	3	2	3
6263	SA626	0	0	1	1	3	3	3	3	3	3	3	3	1	1	3	3	2	2
6264	SA627	0	0	1	1	1	3	1	3	1	3	3	3	1	3	3	3	2	3
6265	SA628	0	0	2	1	3	3	3	3	3	3	3	3	1	1	3	3	2	2
6266	SA629	0	0	1	1	3	3	3	3	3	3	3	3	1	3	3	3	2	3
6267	SA630	0	0	2	1	3	3	3	3	3	3	0	0	1	1	3	3	2	2
6268	SA631	0	0	1	1	3	3	3	3	3	3	3	3	1	1	3	3	2	2
6269	SA632	0	0	1	1	3	3	3	3	3	3	3	3	1	1	3	3	2	2
6270	SA633	0	0	1	1	3	3	3	3	3	3	3	3	1	1	3	3	2	2
6271	SA634	0	0	1	1	1	3	1	3	1	3	3	3	1	3	3	3	2	3
6272	SA636	0	0	2	1	1	3	1	1	1	1	3	3	3	3	3	3	3	3
6273	SA637	0	0	1	1	3	3	3	3	3	3	3	3	1	1	3	3	2	2
6274	SA638	0	0	1	1	3	3	1	1	1	1	3	3	3	3	1	3	3	3
6275	SA639	0	0	2	1	1	3	1	3	1	3	0	0	1	3	1	3	2	3
6276	SA640	0	0	1	1	3	3	1	1	1	1	3	3	3	3	1	1	3	3
6277	SA641	0	0	1	1	1	3	1	3	1	3	3	3	1	3	3	3	2	3
6278	SA642	0	0	1	1	1	1	1	3	1	3	1	3	1	3	1	3	2	3
6279	SA643	0	0	2	1	1	3	1	3	1	3	3	3	1	3	3	3	2	3
6280	SA644	0	0	2	1	1	3	1	3	1	3	3	3	1	3	3	3	2	3
6281	SA645	0	0	1	1	1	3	1	1	1	1	3	3	3	3	3	3	3	3
6282	SA646	0	0	2	1	3	3	1	3	1	3	3	3	1	3	3	3	2	3
6283	SA647	0	0	1	1	3	3	1	3	1	3	3	3	1	3	1	3	2	3
6284	SA648	0	0	1	1	3	3	3	3	3	3	3	3	1	3	3	3	2	3
6285	SA649	0	0	2	1	3	3	1	3	1	3	3	3	1	3	3	3	2	3
6286	SA650	0	0	2	1	1	3	1	3	1	3	3	3	1	3	3	3	2	3
6287	SA651	0	0	2	1	3	3	3	3	3	3	3	3	1	1	3	3	2	3
6288	SA652	0	0	2	1	3	3	3	3	3	3	3	3	1	1	3	3	2	2
6289	SA653	0	0	1	1	1	3	1	1	1	1	3	3	3	3	1	3	3	3
6290	SA654	0	0	1	1	1	3	1	3	1	3	1	3	1	3	1	3	2	3
6291	SA655	0	0	2	1	3	3	1	3	1	3	3	3	1	3	3	3	2	3
6292	SA656	0	0	2	1	3	3	1	3	1	3	3	3	1	3	3	3	2	3
6293	SA657	0	0	2	1	3	3	3	3	3	3	3	3	1	1	3	3	2	2
6294	SA658	0	0	1	1	3	3	3	3	3	3	3	3	1	1	3	3	2	2
6295	SA659	0	0	1	1	3	3	1	3	1	3	3	3	1	3	3	3	2	3
6296	SA660	0	0	2	1	3	3	1	3	1	3	3	3	1	3	1	3	2	3
6297	SA661	0	0	2	1	1	3	1	3	1	3	3	3	1	3	3	3	2	3
6298	SA662	0	0	1	1	3	3	1	3	1	3	1	3	1	3	1	1	2	3
6299	SA663	0	0	2	1	3	3	3	3	3	3	0	0	1	1	3	3	2	2
6300	SA664	0	0	1	1	3	3	3	3	3	3	3	3	1	1	3	3	2	2
6301	SA665	0	0	1	1	3	3	1	3	1	3	3	3	1	3	3	3	3	3
6302	SA666	0	0	2	1	3	3	3	3	3	3	3	3	1	1	3	3	2	3
6303	SA667	0	0	1	1	3	3	1	3	1	3	3	3	1	3	1	3	2	3
6304	SA668	0	0	2	1	1	3	1	1	1	1	3	3	3	3	3	3	3	3
6305	SA669	0	0	1	1	3	3	3	3	3	3	3	3	1	1	3	3	2	2
6306	IZ833	0	0	1	1	0	0	1	3	0	0	0	0	1	3	3	3	0	0
6307	IZ838	0	0	2	1	0	0	1	3	0	0	0	0	1	3	3	3	0	0
6308	IZ839	0	0	2	1	0	0	1	3	0	0	0	0	1	3	3	3	0	0
6309	IZ842	0	0	2	1	0	0	3	3	0	0	0	0	1	1	1	3	0	0
6310	IZ843	0	0	2	1	0	0	3	3	0	0	0	0	1	1	3	3	0	0
6311	IZ850	0	0	2	1	0	0	1	1	0	0	0	0	3	3	3	3	0	0
6312	IZ855	0	0	2	1	0	0	1	3	0	0	0	0	3	3	3	3	0	0
6313	IZ871	0	0	2	1	0	0	1	3	0	0	0	0	1	3	3	3	0	0
6314	RC102	0	0	2	1	0	0	3	3	0	0	0	0	1	1	1	3	2	2
6315	RC104	0	0	1	1	0	0	3	3	0	0	0	0	1	1	3	3	2	2
6316	RC106	0	0	2	1	0	0	3	3	0	0	0	0	1	1	3	3	2	3
6317	RC140	0	0	1	1	0	0	0	0	0	0	0	0	1	3	3	3	2	3
6318	RC146	0	0	1	1	0	0	3	3	0	0	0	0	1	1	3	3	2	2
6319	RC180	0	0	2	1	0	0	1	3	0	0	0	0	1	3	3	3	2	3
6320	RC181	0	0	1	1	0	0	0	0	0	0	0	0	1	1	3	3	2	3
6321	RC204	0	0	2	1	0	0	0	0	0	0	0	0	1	3	1	3	2	3
6322	RC206	0	0	1	1	0	0	3	3	0	0	0	0	1	1	3	3	2	2
6323	RC207	0	0	1	1	0	0	1	1	0	0	0	0	3	3	1	1	3	3
6324	RC208	0	0	1	1	0	0	3	3	0	0	0	0	1	1	3	3	2	3
6325	RC209	0	0	1	1	0	0	1	3	0	0	0	0	1	3	1	3	2	3
6326	RC212	0	0	2	1	0	0	3	3	0	0	0	0	1	1	3	3	2	2
501	IZ936	0	0	2	2	0	0	1	3	1	3	0	0	1	3	1	3	0	0
502	CC101	0	0	2	2	3	3	3	3	0	0	3	3	1	1	1	3	2	2
503	CC102	0	0	2	2	3	3	1	1	1	1	3	3	3	3	1	3	3	3
504	CC103	0	0	1	2	1	3	1	3	1	3	3	3	1	3	3	3	2	3
505	CC105	0	0	1	2	3	3	3	3	3	3	3	3	1	1	3	3	2	2
506	CC107	0	0	2	2	3	3	1	3	1	3	3	3	1	3	1	3	2	3
507	CC108	0	0	2	2	3	3	3	3	3	3	1	3	1	1	3	3	2	2
508	CC109	0	0	1	2	3	3	3	3	3	3	3	3	1	1	3	3	2	2
509	CC110	0	0	1	2	1	3	1	3	1	3	3	3	1	3	3	3	3	3
510	CC111	0	0	1	2	3	3	3	3	3	3	3	3	1	1	3	3	2	2
511	CC112	0	0	1	2	3	3	3	3	3	3	3	3	1	1	3	3	2	2
512	CC113	0	0	1	2	1	3	1	3	1	3	3	3	1	3	3	3	2	3
513	CC114	0	0	1	2	1	3	1	3	1	3	3	3	1	3	3	3	2	3
514	CC115	0	0	2	2	3	3	1	3	1	3	3	3	1	3	1	3	2	3
515	CC116	0	0	2	2	3	3	1	3	1	3	1	3	1	3	1	3	2	3
516	CC117	0	0	1	2	3	3	3	3	0	0	3	3	1	1	0	0	2	2
517	CC118	0	0	2	2	3	3	3	3	3	3	3	3	1	1	3	3	2	2
518	CC119	0	0	2	2	3	3	3	3	0	0	3	3	1	1	3	3	2	2
519	CC120	0	0	2	2	3	3	1	1	1	1	3	3	3	3	3	3	3	3
520	CC121	0	0	1	2	3	3	3	3	3	3	3	3	1	1	3	3	2	2
521	CC122	0	0	2	2	3	3	3	3	3	3	3	3	1	1	3	3	2	2
522	CC123	0	0	1	2	3	3	3	3	3	3	3	3	1	1	3	3	2	2
523	CC124	0	0	1	2	1	3	1	1	1	1	3	3	3	3	3	3	3	3
524	CC125	0	0	2	2	1	3	1	3	1	3	3	3	1	3	3	3	2	3
525	CC126	0	0	2	2	1	3	1	3	1	3	3	3	1	3	3	3	2	3
526	CC127	0	0	2	2	3	3	3	3	3	3	3	3	1	1	0	0	2	2
527	CC128	0	0	1	2	1	3	1	3	1	3	3	3	1	3	3	3	2	3
528	CC129	0	0	1	2	3	3	1	3	1	3	3	3	1	3	3	3	3	3
529	CC130	0	0	2	2	3	3	3	3	3	3	3	3	1	1	3	3	2	2
530	CC131	0	0	2	2	3	3	1	3	1	3	3	3	1	3	3	3	2	3
531	CC132	0	0	2	2	3	3	3	3	3	3	3	3	1	1	3	3	2	2
532	CC133	0	0	1	2	3	3	1	3	1	3	3	3	1	3	3	3	2	3
533	CC134	0	0	1	2	1	1	1	1	1	1	3	3	3	3	3	3	3	3
534	CC135	0	0	1	2	3	3	3	3	3	3	3	3	1	3	3	3	2	3
535	CC136	0	0	2	2	3	3	3	3	3	3	3	3	1	1	3	3	2	3
536	CC137	0	0	1	2	3	3	3	3	3	3	3	3	1	1	3	3	2	2
537	CC138	0	0	2	2	3	3	1	3	1	3	3	3	1	3	3	3	2	3
538	CC139	0	0	1	2	3	3	1	3	1	3	3	3	1	3	3	3	2	3
539	CC140	0	0	2	2	1	3	1	3	1	3	3	3	1	3	3	3	3	3
540	CC141	0	0	1	2	1	3	1	3	1	3	3	3	1	3	3	3	2	3
541	CC142	0	0	2	2	3	3	1	3	1	3	3	3	1	3	3	3	3	3
542	CC143	0	0	1	2	3	3	1	3	1	3	3	3	1	3	3	3	3	3
543	CC144	0	0	2	2	1	1	1	1	1	1	3	3	3	3	1	3	3	3
544	CC145	0	0	2	2	1	3	1	3	1	3	3	3	1	3	3	3	2	3
545	CC146	0	0	2	2	3	3	3	3	3	3	3	3	1	1	3	3	2	2
546	CC147	0	0	1	2	3	3	3	3	3	3	3	3	1	1	3	3	2	2
547	CC148	0	0	2	2	3	3	1	3	1	3	3	3	1	3	3	3	2	3
548	CC149	0	0	1	2	3	3	1	3	1	3	3	3	1	3	3	3	2	3
549	CC150	0	0	1	2	3	3	3	3	3	3	3	3	1	1	3	3	2	2
550	CC151	0	0	1	2	3	3	1	3	1	3	3	3	1	3	3	3	2	3
551	CC152	0	0	2	2	1	3	1	3	1	3	3	3	1	3	3	3	2	3
552	CC154	0	0	1	2	1	3	1	3	1	3	3	3	1	3	3	3	2	3
553	CC161	0	0	2	2	3	3	3	3	3	3	3	3	1	1	3	3	2	2
554	CC162	0	0	2	2	3	3	3	3	3	3	1	3	1	1	1	3	2	2
555	CC166	0	0	1	2	1	3	1	3	1	3	3	3	1	3	3	3	3	3
556	CC171	0	0	1	2	3	3	3	3	3	3	3	3	1	1	3	3	2	2
557	CC172	0	0	2	2	3	3	3	3	3	3	3	3	1	1	3	3	2	2
558	CC173	0	0	2	2	1	3	1	3	1	3	1	3	1	3	3	3	2	3
559	CC174	0	0	1	2	3	3	3	3	3	3	3	3	1	1	3	3	2	2
560	CC175	0	0	1	2	3	3	3	3	3	3	3	3	1	1	3	3	2	2
561	CC176	0	0	2	2	3	3	3	3	3	3	3	3	1	1	3	3	2	2
562	CC177	0	0	2	2	1	3	1	3	1	3	3	3	1	3	3	3	2	3
563	CC178	0	0	2	2	3	3	1	1	1	1	3	3	3	3	1	3	3	3
564	CC179	0	0	1	2	3	3	3	3	3	3	3	3	1	1	3	3	2	2
565	CC180	0	0	1	2	1	1	1	1	1	1	3	3	3	3	1	3	3	3
566	CC181	0	0	2	2	3	3	1	1	1	1	3	3	3	3	1	3	3	3
567	CC182	0	0	2	2	3	3	3	3	3	3	3	3	1	3	3	3	2	3
568	CC183	0	0	2	2	1	3	1	3	1	3	3	3	1	3	3	3	2	3
569	CC184	0	0	1	2	3	3	3	3	3	3	3	3	1	1	3	3	2	2
570	CC185	0	0	2	2	1	3	1	3	1	3	3	3	1	3	3	3	2	3
571	CC186	0	0	1	2	3	3	1	3	1	3	3	3	1	3	1	3	2	3
572	CC187	0	0	1	2	3	3	3	3	3	3	3	3	1	1	3	3	2	2
573	CC188	0	0	2	2	3	3	3	3	3	3	3	3	1	1	3	3	2	2
574	CC189	0	0	2	2	3	3	1	3	1	3	3	3	1	3	1	3	2	3
575	CC190	0	0	1	2	3	3	1	3	1	3	3	3	1	3	3	3	2	3
576	CC191	0	0	2	2	0	0	0	0	0	0	0	0	0	0	0	0	2	3
577	CC192	0	0	1	2	1	3	1	3	1	3	3	3	1	3	3	3	2	3
578	CC193	0	0	2	2	3	3	1	1	1	1	3	3	1	3	3	3	3	3
579	CC194	0	0	2	2	3	3	3	3	3	3	3	3	1	1	3	3	2	2
580	CC195	0	0	2	2	1	3	1	1	1	1	3	3	3	3	3	3	3	3
581	CC196	0	0	2	2	3	3	1	3	1	3	3	3	1	3	1	3	2	3
582	CC197	0	0	2	2	1	3	3	3	3	3	1	3	1	1	3	3	2	2
583	CC198	0	0	1	2	1	3	1	3	1	3	3	3	3	3	3	3	3	3
584	CC199	0	0	2	2	3	3	1	3	1	3	1	3	1	3	1	3	2	3
585	CC200	0	0	2	2	3	3	3	3	3	3	3	3	1	1	3	3	2	2
586	CC201	0	0	2	2	1	1	1	1	1	1	3	3	3	3	3	3	3	3
587	CC202	0	0	2	2	3	3	3	3	3	3	3	3	1	1	3	3	2	2
588	CC203	0	0	1	2	3	3	1	3	1	3	3	3	1	3	1	3	2	3
589	CC204	0	0	2	2	3	3	3	3	3	3	1	3	1	1	3	3	2	2
590	CC205	0	0	1	2	3	3	1	1	1	1	3	3	3	3	3	3	3	3
591	CC206	0	0	1	2	3	3	3	3	3	3	3	3	1	1	3	3	2	2
592	CC207	0	0	2	2	3	3	3	3	3	3	3	3	1	1	3	3	2	2
593	CC208	0	0	2	2	1	3	1	3	1	3	3	3	1	3	3	3	2	3
594	CC209	0	0	2	2	3	3	3	3	3	3	3	3	1	1	3	3	2	2
595	CC210	0	0	1	2	3	3	3	3	3	3	3	3	1	1	3	3	2	2
596	CC211	0	0	1	2	3	3	1	3	1	3	3	3	1	3	3	3	2	3
597	CC212	0	0	1	2	1	3	1	3	1	3	3	3	3	3	3	3	3	3
598	CC213	0	0	2	2	3	3	1	3	1	1	3	3	1	3	3	3	2	3
599	CC214	0	0	1	2	1	3	1	3	3	3	3	3	1	3	3	3	2	3
600	CC216	0	0	1	2	3	3	1	3	1	1	3	3	1	3	3	3	2	3
601	CC217	0	0	1	2	1	3	1	3	1	3	3	3	1	3	3	3	2	3
602	CC218	0	0	2	2	0	0	0	0	0	0	0	0	0	0	0	0	2	2
603	CC219	0	0	2	2	1	3	1	3	1	3	3	3	1	3	3	3	3	3
604	CC220	0	0	2	2	3	3	1	3	1	3	3	3	1	3	1	3	2	3
605	CC221	0	0	1	2	3	3	3	3	1	3	3	3	1	1	3	3	2	2
606	CC222	0	0	1	2	1	1	1	1	3	3	3	3	3	3	1	3	3	3
607	CC223	0	0	1	2	3	3	3	3	1	3	3	3	1	1	3	3	2	2
608	CC224	0	0	1	2	3	3	1	3	1	3	3	3	1	3	3	3	2	3
609	CC225	0	0	1	2	1	3	1	3	1	1	3	3	1	3	3	3	2	3
610	CC226	0	0	2	2	1	3	1	3	1	3	3	3	1	3	3	3	2	3
611	CC227	0	0	1	2	0	0	0	0	0	0	0	0	0	0	0	0	2	2
612	CC228	0	0	2	2	3	3	1	1	1	3	3	3	3	3	1	3	3	3
613	CC230	0	0	1	2	1	3	1	1	1	3	3	3	3	3	3	3	3	3
614	CC231	0	0	2	2	3	3	3	3	3	3	3	3	1	1	3	3	2	2
615	CC232	0	0	1	2	3	3	1	3	3	3	3	3	1	3	3	3	2	3
616	CC233	0	0	1	2	3	3	3	3	1	3	3	3	1	1	3	3	2	2
617	CC234	0	0	1	2	3	3	3	3	1	3	3	3	1	1	3	3	2	2
618	CC235	0	0	2	2	1	3	1	3	3	3	3	3	1	3	3	3	2	3
619	CC237	0	0	2	2	3	3	3	3	3	3	1	3	1	1	1	3	2	2
620	CC238	0	0	1	2	3	3	3	3	3	3	3	3	1	3	1	3	2	3
621	CC239	0	0	1	2	3	3	3	3	3	3	3	3	1	1	3	3	2	2
622	CC240	0	0	2	2	3	3	3	3	3	3	3	3	1	1	3	3	2	2
623	CC241	0	0	1	2	3	3	3	3	1	3	3	3	1	3	3	3	2	2
624	CC242	0	0	2	2	3	3	1	3	3	3	3	3	1	3	1	3	2	3
625	CC243	0	0	1	2	3	3	3	3	3	3	3	3	1	1	3	3	2	2
626	CC244	0	0	2	2	1	3	1	3	1	1	3	3	1	3	3	3	2	3
627	CC245	0	0	1	2	3	3	1	3	3	3	1	3	1	1	1	3	2	2
628	CC246	0	0	2	2	0	0	0	0	0	0	0	0	0	0	0	0	2	3
629	CC247	0	0	1	2	3	3	1	1	1	1	3	3	3	3	3	3	3	3
630	CC248	0	0	2	2	3	3	3	3	3	3	3	3	1	1	3	3	2	3
631	CC249	0	0	2	2	3	3	3	3	1	3	3	3	1	1	3	3	2	2
632	CC250	0	0	2	2	1	3	1	3	3	3	3	3	1	3	3	3	2	3
633	CC251	0	0	2	2	3	3	1	3	1	3	3	3	1	3	3	3	3	3
634	CC252	0	0	1	2	3	3	3	3	1	3	3	3	1	1	3	3	2	2
635	CC253	0	0	2	2	3	3	1	3	3	3	3	3	1	3	3	3	3	3
636	CC254	0	0	2	2	3	3	1	3	1	3	3	3	1	3	1	3	3	3
637	CC255	0	0	2	2	1	3	1	1	1	1	3	3	3	3	3	3	3	3
638	CC256	0	0	2	2	3	3	1	3	1	3	3	3	1	3	3	3	2	3
639	CC257	0	0	2	2	3	3	3	3	3	3	3	3	1	3	3	3	2	3
640	CC258	0	0	1	2	3	3	3	3	3	3	3	3	1	1	3	3	2	2
641	CC259	0	0	2	2	3	3	3	3	3	3	3	3	1	1	3	3	2	2
642	CC260	0	0	1	2	3	3	1	3	1	3	3	3	1	1	3	3	2	3
643	CC261	0	0	1	2	3	3	3	3	1	3	3	3	1	1	3	3	2	2
644	CC262	0	0	2	2	3	3	1	3	3	3	3	3	1	3	3	3	2	3
645	CC263	0	0	2	2	3	3	1	1	1	3	3	3	3	3	1	3	3	3
646	CC264	0	0	1	2	1	3	1	3	1	3	3	3	1	3	3	3	2	3
647	CC265	0	0	2	2	3	3	3	3	1	3	3	3	1	1	3	3	2	2
648	CC266	0	0	1	2	3	3	1	3	3	3	3	3	1	3	1	3	2	3
649	CC267	0	0	1	2	3	3	1	3	1	3	3	3	1	3	3	3	2	3
650	CC269	0	0	2	2	3	3	3	3	3	3	3	3	1	1	3	3	2	2
651	CC270	0	0	2	2	3	3	3	3	3	3	3	3	1	1	3	3	2	2
652	CC271	0	0	2	2	3	3	3	3	1	3	3	3	1	1	3	3	2	3
653	CC272	0	0	1	2	1	1	1	1	1	1	3	3	3	3	1	3	3	3
654	CC273	0	0	2	2	1	3	1	3	1	3	3	3	1	3	3	3	3	3
655	CC274	0	0	1	2	3	3	3	3	1	3	3	3	1	1	3	3	2	2
656	CC276	0	0	1	2	3	3	1	3	3	3	3	3	1	3	1	3	2	3
657	CC279	0	0	2	2	3	3	1	3	3	3	3	3	1	3	3	3	2	3
658	CC280	0	0	1	2	3	3	3	3	3	3	1	3	1	1	3	3	2	2
659	CC283	0	0	1	2	3	3	3	3	1	3	3	3	1	1	3	3	2	2
660	CC284	0	0	1	2	1	3	1	1	1	1	3	3	3	3	3	3	3	3
661	CC285	0	0	2	2	3	3	3	3	3	3	1	3	1	1	1	3	2	2
662	CC298	0	0	2	2	3	3	1	3	1	1	3	3	1	3	3	3	2	3
663	CC299	0	0	1	2	1	3	1	3	1	1	3	3	1	3	3	3	2	3
664	CC300	0	0	1	2	3	3	1	3	1	3	3	3	1	3	3	3	2	3
665	CC302	0	0	2	2	0	0	1	1	1	3	3	3	3	3	1	1	3	3
666	CC303	0	0	1	2	3	3	1	3	1	3	3	3	1	3	1	3	2	3
667	CC304	0	0	2	2	3	3	1	3	3	3	3	3	1	3	3	3	2	3
668	CC305	0	0	2	2	3	3	3	3	3	3	3	3	1	1	3	3	2	2
669	CC306	0	0	1	2	1	3	1	3	3	3	3	3	1	3	3	3	2	3
670	CC307	0	0	2	2	3	3	3	3	3	3	1	3	1	1	3	3	2	2
671	CC308	0	0	2	2	3	3	3	3	3	3	3	3	1	1	3	3	2	3
672	CC309	0	0	1	2	3	3	3	3	1	3	3	3	1	1	0	0	2	3
673	CC310	0	0	1	2	3	3	1	1	1	3	3	3	3	3	1	3	3	3
674	CC311	0	0	1	2	3	3	3	3	1	3	3	3	1	1	3	3	2	2
675	CC312	0	0	2	2	1	3	1	1	1	3	3	3	3	3	3	3	3	3
676	CC313	0	0	2	2	3	3	1	3	1	3	3	3	1	3	3	3	2	3
677	CC314	0	0	2	2	1	3	1	1	1	3	3	3	3	3	1	3	3	3
678	CC315	0	0	2	2	3	3	3	3	3	3	3	3	1	1	3	3	2	2
679	CC316	0	0	2	2	3	3	3	3	3	3	3	3	1	1	3	3	2	2
680	CC317	0	0	2	2	3	3	3	3	3	3	3	3	1	1	3	3	2	2
681	CC318	0	0	1	2	3	3	1	1	1	1	3	3	3	3	3	3	3	3
682	CC319	0	0	2	2	3	3	1	3	1	3	3	3	1	3	3	3	2	3
683	CC320	0	0	2	2	1	3	1	3	1	3	3	3	1	3	1	3	2	3
684	CC322	0	0	2	2	1	3	1	3	1	3	3	3	1	3	3	3	3	3
685	CC324	0	0	1	2	3	3	3	3	3	3	3	3	1	1	3	3	2	2
686	CC325	0	0	1	2	3	3	1	3	1	3	3	3	1	1	3	3	2	3
687	CC326	0	0	1	2	3	3	3	3	3	3	1	3	1	1	1	3	2	2
688	CC329	0	0	1	2	1	3	1	3	1	3	3	3	1	3	3	3	2	3
689	CC332	0	0	2	2	3	3	1	3	1	3	3	3	1	3	3	3	2	3
690	CC333	0	0	2	2	3	3	3	3	3	3	3	3	1	1	3	3	2	2
691	CC334	0	0	2	2	3	3	1	1	1	1	3	3	3	3	1	3	3	3
692	CC336	0	0	2	2	1	1	1	1	1	1	3	3	3	3	3	3	3	3
693	CC337	0	0	1	2	3	3	1	3	1	3	3	3	1	3	1	3	2	3
694	CC338	0	0	2	2	3	3	3	3	3	3	3	3	1	1	3	3	2	2
695	CC339	0	0	1	2	1	3	1	3	1	3	3	3	1	3	3	3	2	3
696	CC340	0	0	2	2	1	1	1	1	1	1	3	3	3	3	1	3	3	3
697	CC341	0	0	1	2	1	3	1	3	1	3	3	3	1	3	3	3	3	3
698	CC342	0	0	1	2	3	3	3	3	3	3	3	3	1	1	3	3	2	2
699	CC343	0	0	1	2	3	3	3	3	3	3	3	3	1	3	3	3	2	2
700	CC345	0	0	2	2	3	3	3	3	3	3	3	3	1	1	3	3	2	2
701	CC346	0	0	2	2	3	3	3	3	3	3	3	3	1	1	3	3	2	2
702	CC347	0	0	2	2	3	3	3	3	3	3	3	3	1	1	3	3	2	3
703	CC348	0	0	1	2	3	3	3	3	3	3	1	3	1	1	1	3	2	2
704	CC349	0	0	2	2	3	3	3	3	3	3	1	3	1	1	3	3	2	2
705	CC350	0	0	2	2	1	3	1	3	1	3	3	3	1	3	3	3	2	3
706	CC351	0	0	2	2	3	3	3	3	3	3	3	3	1	1	3	3	2	2
707	CC352	0	0	2	2	3	3	1	3	1	3	3	3	1	3	3	3	2	3
708	CC353	0	0	2	2	3	3	3	3	3	3	3	3	1	1	3	3	2	2
709	CC354	0	0	1	2	3	3	3	3	3	3	3	3	1	1	3	3	2	2
710	CC355	0	0	2	2	1	3	1	3	1	3	1	3	1	3	3	3	2	3
711	CC356	0	0	2	2	3	3	3	3	3	3	3	3	1	1	3	3	2	2
712	CC357	0	0	2	2	3	3	3	3	3	3	3	3	1	1	3	3	2	2
713	CC358	0	0	2	2	3	3	1	3	1	3	3	3	1	3	3	3	2	3
714	CC359	0	0	2	2	3	3	3	3	3	3	1	3	1	1	1	3	2	2
715	CC360	0	0	2	2	3	3	1	1	1	1	3	3	3	3	1	3	3	3
716	CC361	0	0	1	2	3	3	3	3	3	3	3	3	1	1	3	3	2	2
717	CC362	0	0	1	2	3	3	3	3	3	3	3	3	1	1	3	3	2	2
718	CC363	0	0	1	2	3	3	1	3	1	3	1	3	1	3	1	3	2	3
719	CC364	0	0	2	2	3	3	3	3	3	3	3	3	1	1	3	3	2	2
720	CC365	0	0	2	2	3	3	1	3	1	3	3	3	1	3	3	3	2	3
721	CC366	0	0	2	2	3	3	1	3	1	3	3	3	1	3	1	3	2	3
722	CC367	0	0	1	2	1	3	1	3	1	3	3	3	1	3	3	3	2	3
723	CC368	0	0	1	2	3	3	3	3	3	3	3	3	1	1	3	3	2	2
724	CC369	0	0	2	2	3	3	3	3	3	3	3	3	1	1	3	3	2	2
725	CC370	0	0	1	2	3	3	3	3	3	3	3	3	1	1	3	3	2	2
726	CC371	0	0	1	2	1	3	3	3	3	3	1	3	1	1	1	3	2	2
727	CC372	0	0	2	2	1	3	1	3	1	3	3	3	1	3	3	3	2	3
728	CC373	0	0	2	2	3	3	3	3	3	3	3	3	1	1	3	3	2	3
729	CC374	0	0	2	2	3	3	3	3	3	3	3	3	1	1	3	3	2	2
730	CC375	0	0	1	2	3	3	3	3	3	3	3	3	1	1	3	3	2	2
731	CC376	0	0	1	2	3	3	1	3	1	3	1	3	1	3	1	3	2	3
732	CC377	0	0	1	2	3	3	3	3	3	3	3	3	1	1	3	3	2	2
733	CC378	0	0	1	2	3	3	3	3	3	3	3	3	1	1	3	3	2	3
734	CC379	0	0	2	2	3	3	3	3	3	3	3	3	1	1	3	3	2	3
735	CC380	0	0	2	2	3	3	3	3	3	3	3	3	1	1	3	3	2	2
736	CC381	0	0	2	2	3	3	3	3	3	3	3	3	1	1	3	3	2	2
737	CC382	0	0	2	2	3	3	1	3	1	3	3	3	1	3	1	3	2	3
738	CC383	0	0	2	2	3	3	3	3	3	3	3	3	1	1	3	3	2	2
739	CC384	0	0	2	2	3	3	3	3	3	3	3	3	1	1	3	3	2	2
740	CC385	0	0	2	2	3	3	3	3	3	3	3	3	1	1	3	3	2	2
741	CC386	0	0	2	2	3	3	3	3	3	3	3	3	1	1	3	3	2	2
742	CC387	0	0	2	2	1	3	1	3	1	3	3	3	1	3	3	3	2	3
743	CC388	0	0	2	2	3	3	3	3	3	3	3	3	1	1	3	3	2	2
744	CC389	0	0	2	2	1	1	1	1	1	1	3	3	3	3	3	3	3	3
745	CC390	0	0	1	2	3	3	3	3	3	3	3	3	1	1	3	3	2	2
746	CC391	0	0	2	2	1	3	1	1	1	1	3	3	3	3	1	3	3	3
747	CC392	0	0	1	2	3	3	3	3	3	3	3	3	1	3	3	3	2	2
748	CC393	0	0	2	2	3	3	3	3	3	3	3	3	1	1	3	3	2	2
749	CC394	0	0	2	2	1	3	1	3	1	3	3	3	1	3	3	3	2	3
750	CC395	0	0	2	2	3	3	3	3	3	3	3	3	1	1	3	3	2	3
751	CC396	0	0	1	2	3	3	3	3	3	3	3	3	1	1	3	3	2	3
752	CC397	0	0	1	2	3	3	3	3	3	3	3	3	1	1	3	3	2	3
753	CC398	0	0	1	2	3	3	3	3	3	3	3	3	1	1	3	3	2	2
754	CC399	0	0	2	2	3	3	1	3	1	3	3	3	1	3	1	3	2	3
755	CC400	0	0	2	2	3	3	1	3	1	3	1	3	1	3	1	3	2	3
756	CC401	0	0	1	2	3	3	3	3	3	3	3	3	1	1	3	3	2	3
757	CC402	0	0	2	2	1	3	1	3	1	3	1	3	1	3	1	3	2	3
758	CC403	0	0	1	2	3	3	3	3	3	3	3	3	1	1	3	3	2	3
759	CC404	0	0	1	2	3	3	1	1	1	1	3	3	3	3	1	3	2	3
760	CC405	0	0	2	2	3	3	1	3	0	0	3	3	1	3	3	3	2	3
761	CC406	0	0	1	2	3	3	3	3	3	3	3	3	1	1	3	3	2	2
762	CC407	0	0	1	2	3	3	3	3	3	3	3	3	1	1	3	3	2	2
763	CC408	0	0	1	2	3	3	3	3	3	3	3	3	1	1	3	3	2	2
764	CC409	0	0	2	2	1	3	3	3	3	3	1	3	1	1	1	3	2	3
765	CC410	0	0	2	2	3	3	3	3	3	3	1	3	1	1	1	3	2	2
766	CC411	0	0	1	2	3	3	1	3	1	3	3	3	1	3	3	3	2	3
767	CC412	0	0	1	2	3	3	1	3	1	3	3	3	1	3	3	3	3	3
768	CC413	0	0	2	2	3	3	1	3	1	3	3	3	1	3	3	3	2	3
769	CC414	0	0	2	2	3	3	3	3	3	3	1	3	1	1	1	3	2	2
770	CC415	0	0	1	2	3	3	1	3	1	3	3	3	1	3	3	3	2	3
771	CC416	0	0	1	2	3	3	3	3	3	3	3	3	1	1	3	3	2	2
772	CC417	0	0	2	2	3	3	3	3	3	3	3	3	1	1	3	3	2	2
773	CC418	0	0	2	2	3	3	3	3	3	3	3	3	1	1	3	3	2	2
774	CC419	0	0	2	2	1	3	3	3	1	3	3	3	1	3	3	3	2	3
775	CC420	0	0	2	2	3	3	3	3	3	3	3	3	1	1	3	3	2	3
776	CC421	0	0	2	2	3	3	3	3	3	3	3	3	1	1	0	0	2	2
777	CC422	0	0	2	2	3	3	3	3	3	3	1	3	1	1	1	3	2	2
778	CC423	0	0	2	2	3	3	3	3	3	3	3	3	1	1	3	3	2	3
779	CC425	0	0	2	2	3	3	1	3	1	3	3	3	1	3	3	3	2	3
780	CC426	0	0	1	2	3	3	1	3	1	3	3	3	1	3	3	3	2	3
781	CC427	0	0	2	2	3	3	1	3	1	3	3	3	1	3	3	3	2	3
782	CC428	0	0	2	2	1	3	1	3	1	3	3	3	1	3	3	3	2	3
783	CC429	0	0	1	2	3	3	1	3	1	3	3	3	1	3	3	3	3	3
784	CC430	0	0	1	2	3	3	1	3	1	3	3	3	1	3	3	3	2	3
785	CC431	0	0	1	2	3	3	1	1	1	1	3	3	3	3	1	3	3	3
786	CC432	0	0	2	2	1	3	1	1	1	1	3	3	3	3	3	3	3	3
787	CC434	0	0	1	2	3	3	3	3	3	3	3	3	1	1	1	3	2	2
788	CC435	0	0	2	2	3	3	1	3	1	3	3	3	1	3	1	3	2	3
789	CC436	0	0	2	2	3	3	3	3	3	3	3	3	1	1	3	3	2	3
790	CC437	0	0	1	2	3	3	1	1	1	1	3	3	3	3	1	3	3	3
791	CC438	0	0	1	2	3	3	1	3	1	3	3	3	1	3	3	3	2	3
792	CC439	0	0	2	2	3	3	3	3	3	3	3	3	1	3	3	3	2	2
793	CC440	0	0	1	2	3	3	3	3	3	3	3	3	1	1	3	3	2	2
794	CC441	0	0	1	2	3	3	3	3	3	3	3	3	1	1	3	3	2	2
795	CC442	0	0	2	2	3	3	3	3	3	3	3	3	1	1	3	3	2	2
796	CC443	0	0	1	2	3	3	1	3	1	3	3	3	1	3	3	3	2	3
797	CC444	0	0	2	2	3	3	1	3	1	3	3	3	1	3	3	3	2	3
798	CC445	0	0	1	2	3	3	3	3	3	3	3	3	1	1	3	3	2	2
799	CC446	0	0	2	2	3	3	1	3	1	3	3	3	3	3	3	3	2	3
800	CC447	0	0	2	2	3	3	3	3	3	3	3	3	1	1	3	3	2	2
801	CC448	0	0	1	2	3	3	3	3	3	3	1	3	1	1	1	3	2	2
802	CC449	0	0	2	2	3	3	3	3	3	3	3	3	1	3	3	3	2	2
803	CC451	0	0	2	2	3	3	1	1	1	1	3	3	3	3	1	3	3	3
804	CC452	0	0	2	2	1	3	1	3	1	3	3	3	1	3	3	3	2	3
805	CC453	0	0	2	2	3	3	1	3	1	3	3	3	1	3	3	3	2	3
806	CC454	0	0	1	2	3	3	1	1	1	1	3	3	3	3	3	3	3	3
807	CC455	0	0	2	2	3	3	3	3	3	3	3	3	1	1	3	3	2	3
808	CC457	0	0	1	2	3	3	3	3	3	3	3	3	1	1	3	3	2	2
809	CC458	0	0	1	2	3	3	1	1	1	1	3	3	3	3	1	3	3	3
810	CC459	0	0	1	2	3	3	1	3	1	3	3	3	1	3	1	3	2	3
811	CC460	0	0	1	2	1	3	1	3	1	3	3	3	1	3	3	3	2	3
812	CC461	0	0	1	2	3	3	1	3	1	3	3	3	1	3	3	3	2	3
813	CC462	0	0	2	2	3	3	3	3	3	3	3	3	1	1	3	3	2	2
814	CC463	0	0	2	2	3	3	1	3	1	3	3	3	1	3	1	3	2	3
815	CC464	0	0	1	2	3	3	1	3	1	3	3	3	1	3	3	3	2	3
816	CC465	0	0	2	2	3	3	3	3	3	3	3	3	1	1	3	3	2	2
817	CC466	0	0	1	2	3	3	3	3	3	3	1	3	1	1	1	3	2	2
818	CC467	0	0	1	2	1	3	1	3	1	3	1	3	1	3	1	3	2	3
819	CC468	0	0	2	2	3	3	3	3	3	3	3	3	1	1	3	3	2	2
820	CC469	0	0	2	2	3	3	3	3	3	3	3	3	1	1	1	3	2	2
821	CC470	0	0	2	2	3	3	3	3	3	3	3	3	1	3	3	3	2	3
822	CC471	0	0	2	2	3	3	1	3	1	3	3	3	1	3	3	3	2	3
823	CC472	0	0	1	2	1	3	1	3	1	3	3	3	1	3	3	3	2	3
824	CC473	0	0	1	2	3	3	3	3	3	3	3	3	1	1	3	3	2	2
825	CC474	0	0	2	2	3	3	3	3	3	3	3	3	1	1	0	0	2	2
826	CC475	0	0	2	2	3	3	1	3	1	3	3	3	1	3	1	3	2	3
827	CC476	0	0	2	2	3	3	3	3	3	3	3	3	1	1	3	3	2	2
828	CC477	0	0	2	2	3	3	1	3	1	3	3	3	1	3	1	3	2	3
829	CC478	0	0	2	2	3	3	3	3	3	3	3	3	1	1	3	3	2	2
830	CC479	0	0	2	2	3	3	1	3	1	3	3	3	1	3	1	3	2	3
831	CC480	0	0	2	2	3	3	3	3	3	3	3	3	1	1	3	3	2	2
832	CC481	0	0	2	2	3	3	3	3	3	3	3	3	1	1	3	3	2	2
833	CC482	0	0	2	2	3	3	1	3	1	3	1	3	1	3	1	1	2	3
834	CC483	0	0	2	2	3	3	3	3	3	3	1	3	1	1	1	3	2	2
835	CC484	0	0	2	2	3	3	3	3	3	3	3	3	1	1	3	3	2	2
836	CC485	0	0	2	2	3	3	1	3	1	3	3	3	1	3	3	3	2	3
837	CC486	0	0	1	2	1	3	1	1	1	1	3	3	3	3	3	3	3	3
838	CC488	0	0	2	2	1	3	1	3	1	3	3	3	1	3	3	3	2	3
839	CC489	0	0	2	2	3	3	1	3	1	3	3	3	1	3	3	3	2	3
840	CC490	0	0	1	2	3	3	1	3	1	3	3	3	1	3	3	3	2	3
841	CC491	0	0	2	2	1	3	1	3	1	3	3	3	1	3	3	3	2	3
842	CC492	0	0	2	2	3	3	3	3	3	3	3	3	1	1	3	3	2	2
843	CC493	0	0	2	2	3	3	3	3	3	3	3	3	1	1	3	3	2	2
844	CC494	0	0	2	2	3	3	3	3	3	3	3	3	1	1	3	3	2	2
845	CC495	0	0	1	2	3	3	3	3	3	3	3	3	1	1	1	3	2	3
846	CC496	0	0	2	2	3	3	3	3	3	3	3	3	1	1	3	3	2	2
847	CC497	0	0	1	2	3	3	3	3	3	3	3	3	1	1	3	3	2	2
848	CC498	0	0	2	2	3	3	3	3	3	3	3	3	1	1	3	3	2	2
849	CC499	0	0	2	2	3	3	1	3	1	3	1	3	1	3	1	3	2	3
850	CC500	0	0	1	2	1	3	1	3	1	3	3	3	1	3	3	3	2	3
851	CC501	0	0	1	2	3	3	3	3	3	3	3	3	1	1	3	3	2	2
852	CC502	0	0	2	2	3	3	3	3	3	3	3	3	1	1	3	3	2	2
853	CC503	0	0	2	2	1	3	1	3	0	0	3	3	1	3	3	3	2	3
854	CC504	0	0	2	2	1	3	1	3	1	3	3	3	1	3	3	3	2	3
855	CC505	0	0	1	2	3	3	1	3	1	3	3	3	1	3	3	3	2	3
856	CC506	0	0	2	2	3	3	1	3	1	3	3	3	1	3	1	3	2	3
857	CC507	0	0	2	2	3	3	3	3	3	3	3	3	1	1	3	3	2	2
858	CC508	0	0	2	2	3	3	1	3	1	3	3	3	1	3	3	3	2	3
859	CC509	0	0	1	2	3	3	3	3	3	3	3	3	1	1	3	3	2	2
860	CC510	0	0	1	2	3	3	3	3	3	3	3	3	1	1	3	3	2	2
861	CC511	0	0	2	2	1	3	1	1	1	1	3	3	3	3	3	3	3	3
862	CC512	0	0	2	2	3	3	1	3	1	3	1	3	1	3	1	3	2	3
863	CC513	0	0	2	2	3	3	1	3	1	3	3	3	1	3	1	3	3	3
864	CC514	0	0	1	2	3	3	3	3	3	3	3	3	1	1	1	1	2	2
865	CC515	0	0	2	2	1	3	3	3	3	3	3	3	1	1	1	1	2	2
866	CC516	0	0	2	2	3	3	1	3	1	3	3	3	1	3	1	3	2	3
867	CC517	0	0	1	2	3	3	3	3	3	3	3	3	1	1	1	1	2	2
868	CC518	0	0	2	2	3	3	1	3	1	3	3	3	1	3	1	3	2	3
869	CC519	0	0	1	2	1	3	1	3	1	3	3	3	1	3	1	3	2	3
870	CC520	0	0	2	2	3	3	1	3	1	3	3	3	1	3	1	3	2	3
871	CC521	0	0	2	2	1	3	1	1	1	1	3	3	3	3	3	3	3	3
872	CC522	0	0	2	2	3	3	3	3	3	3	3	3	1	1	1	1	3	3
873	CC523	0	0	1	2	3	3	3	3	3	3	3	3	1	1	1	1	2	2
874	CC524	0	0	1	2	1	1	3	3	3	3	3	3	1	1	1	1	2	2
875	CC525	0	0	1	2	3	3	3	3	3	3	3	3	1	1	1	1	2	2
876	CC526	0	0	2	2	3	3	3	3	3	3	3	3	1	1	1	1	2	2
877	CC539	0	0	2	2	3	3	1	3	1	3	3	3	1	3	1	3	2	3
878	CC547	0	0	2	2	3	3	1	3	1	3	3	3	1	3	1	3	2	3
879	CC550	0	0	2	2	3	3	3	3	3	3	3	3	1	1	1	1	2	2
880	SA203	0	0	1	2	0	0	0	0	0	0	0	0	3	3	3	3	3	3
1677	CK001	0	0	2	1	0	0	0	0	0	0	0	0	0	0	0	0	2	3
1678	CK004	0	0	2	1	0	0	0	0	0	0	0	0	0	0	0	0	2	3
1679	CK005	0	0	2	1	0	0	0	0	0	0	0	0	0	0	0	0	2	3
1680	CK006	0	0	2	1	0	0	0	0	0	0	0	0	0	0	0	0	2	3
1681	CK010	0	0	1	1	0	0	0	0	0	0	0	0	0	0	0	0	2	2
1682	CK011	0	0	2	1	0	0	0	0	0	0	0	0	0	0	0	0	2	2
1683	CK018	0	0	1	1	0	0	0	0	0	0	0	0	0	0	0	0	2	2
1684	CK019	0	0	2	1	0	0	0	0	0	0	0	0	0	0	0	0	2	3
1685	CK033	0	0	2	1	0	0	0	0	0	0	0	0	0	0	0	0	3	3
1686	CK038	0	0	2	1	0	0	0	0	0	0	0	0	0	0	0	0	3	3
1687	CK040	0	0	2	1	0	0	0	0	0	0	0	0	0	0	0	0	2	2
1688	CK043	0	0	1	1	0	0	0	0	0	0	0	0	0	0	0	0	2	3
1689	CK047	0	0	1	1	0	0	0	0	0	0	0	0	0	0	0	0	2	2
1690	CK048	0	0	2	1	0	0	0	0	0	0	0	0	0	0	0	0	2	3
1691	IZ439	0	0	2	1	3	3	1	3	1	3	3	3	1	3	1	3	3	3
1692	IZ560	0	0	1	1	3	3	3	3	3	3	1	3	1	1	1	3	2	3
1693	IZ563	0	0	2	1	0	0	1	3	1	3	3	3	1	3	3	3	2	3
1694	IZ566	0	0	2	1	3	3	3	3	3	3	3	3	1	1	3	3	3	3
1695	IZ622	0	0	2	1	3	3	3	3	3	3	3	3	1	1	3	3	3	3
1696	IZ624	0	0	2	1	1	3	1	3	1	3	3	3	1	3	3	3	2	3
1697	IZ625	0	0	2	1	3	3	1	3	1	3	3	3	1	3	3	3	2	3
1698	IZ631	0	0	1	1	3	3	1	1	1	1	3	3	3	3	3	3	3	3
1699	IZ872	0	0	2	1	0	0	1	1	0	0	3	3	3	3	3	3	3	3
1700	IZ892	0	0	1	1	0	0	1	3	1	3	3	3	1	3	3	3	2	3
1701	IZ924	0	0	1	1	0	0	1	3	1	3	0	0	1	3	3	3	2	3
1702	IZ940	0	0	2	1	0	0	0	0	1	1	0	0	0	0	0	0	0	0
1703	IZ941	0	0	1	1	0	0	3	3	3	3	3	3	0	0	3	3	0	0
1704	SA101	0	0	2	1	1	3	1	3	1	3	3	3	1	3	3	3	2	3
1705	SA104	0	0	2	1	3	3	3	3	3	3	3	3	1	1	3	3	2	2
1706	SA105	0	0	2	1	3	3	3	3	3	3	1	3	1	3	1	3	2	2
1707	SA112	0	0	1	1	3	3	3	3	3	3	1	3	1	1	3	3	2	2
1708	SA119	0	0	1	1	3	3	3	3	3	3	1	3	1	1	1	3	2	2
1709	SA120	0	0	2	1	3	3	1	3	1	3	3	3	1	3	1	3	2	3
1710	SA145	0	0	2	1	3	3	1	3	1	3	3	3	1	3	1	3	2	3
1711	SA147	0	0	2	1	3	3	1	3	1	3	3	3	1	3	3	3	2	3
1712	SA170	0	0	2	1	1	3	3	3	3	3	1	3	1	1	1	3	2	2
1713	SA193	0	0	1	1	3	3	3	3	3	3	3	3	1	1	3	3	2	2
1714	SA197	0	0	2	1	3	3	1	3	1	3	3	3	1	3	1	3	2	3
1715	SA237	0	0	1	1	3	3	1	3	1	3	3	3	1	3	3	3	2	3
1716	SA239	0	0	1	1	3	3	1	3	1	3	3	3	1	3	1	3	3	3
1717	SA241	0	0	1	1	1	3	1	1	1	1	3	3	3	3	3	3	3	3
1718	SA245	0	0	2	1	1	3	1	3	1	3	3	3	1	3	3	3	2	3
1719	SA246	0	0	1	1	3	3	3	3	3	3	3	3	1	1	3	3	2	2
1720	SA266	0	0	2	1	3	3	3	3	3	3	3	3	1	1	3	3	2	2
1721	SA268	0	0	2	1	1	3	1	3	1	3	3	3	1	3	3	3	2	3
1722	SA269	0	0	2	1	3	3	1	3	1	3	3	3	1	3	3	3	2	3
1723	SA270	0	0	2	1	3	3	1	3	1	3	3	3	1	3	3	3	2	3
1724	SA271	0	0	1	1	3	3	0	0	1	3	3	3	1	3	3	3	2	3
1725	SA273	0	0	2	1	3	3	1	3	1	3	3	3	1	3	3	3	2	3
1726	SA274	0	0	2	1	3	3	1	3	1	3	3	3	1	3	3	3	3	3
1727	SA276	0	0	2	1	3	3	1	3	1	3	3	3	1	3	3	3	2	3
1728	SA278	0	0	1	1	3	3	1	1	1	1	3	3	3	3	1	3	3	3
1729	SA279	0	0	2	1	1	3	1	3	1	3	3	3	1	3	3	3	2	3
1730	SA284	0	0	2	1	3	3	1	3	1	3	3	3	1	3	3	3	2	3
1731	SA287	0	0	1	1	3	3	3	3	3	3	1	3	1	1	1	3	2	2
1732	SA289	0	0	1	1	3	3	3	3	3	3	1	3	1	1	1	3	2	2
1733	SA291	0	0	1	1	3	3	3	3	3	3	3	3	1	1	3	3	2	2
1734	SA292	0	0	1	1	3	3	3	3	3	3	3	3	1	1	3	3	2	2
1735	SA295	0	0	2	1	3	3	3	3	3	3	3	3	1	1	3	3	2	2
1736	SA296	0	0	1	1	3	3	3	3	3	3	1	1	1	1	1	3	2	2
1737	SA298	0	0	2	1	3	3	1	3	1	3	3	3	1	3	3	3	2	3
1738	SA299	0	0	2	1	3	3	1	3	1	3	3	3	3	3	3	3	2	3
1739	SA300	0	0	1	1	3	3	3	3	3	3	3	3	1	1	3	3	2	2
1740	SA302	0	0	2	1	3	3	3	3	3	3	3	3	1	1	3	3	2	2
1741	SA303	0	0	2	1	3	3	1	3	1	3	3	3	3	3	3	3	3	3
1742	SA304	0	0	1	1	1	3	1	3	1	3	3	3	1	3	3	3	2	3
1743	SA306	0	0	1	1	3	3	1	3	1	3	3	3	1	3	3	3	2	3
1744	SA307	0	0	1	1	3	3	1	3	1	3	3	3	1	3	3	3	2	3
1745	SA324	0	0	2	1	1	3	1	3	1	3	3	3	1	3	3	3	3	3
1746	SA341	0	0	1	1	3	3	1	3	1	3	3	3	1	3	3	3	2	3
1747	SA348	0	0	2	1	1	3	1	3	1	3	1	3	1	3	1	3	2	3
1748	SA349	0	0	2	1	3	3	3	3	3	3	3	3	1	1	3	3	2	2
1749	SA353	0	0	1	1	3	3	1	3	1	3	3	3	1	3	3	3	2	3
1750	SA356	0	0	1	1	3	3	3	3	3	3	3	3	1	1	3	3	2	2
1751	SA357	0	0	2	1	3	3	1	3	1	3	3	3	1	3	3	3	3	3
1752	SA359	0	0	2	1	1	3	3	3	3	3	1	3	1	1	1	3	2	2
1753	SA361	0	0	2	1	1	3	1	3	1	3	3	3	1	3	3	3	2	3
1754	SA362	0	0	2	1	3	3	1	1	1	1	3	3	3	3	1	3	3	3
1755	SA363	0	0	2	1	3	3	1	3	1	3	1	3	1	3	1	3	2	3
1756	SA364	0	0	2	1	3	3	1	3	1	3	3	3	1	3	3	3	0	0
1757	SA366	0	0	2	1	1	3	3	3	3	3	1	3	1	1	1	3	2	2
1758	SA367	0	0	1	1	3	3	1	3	1	3	3	3	1	3	3	3	2	3
1759	SA374	0	0	2	1	1	3	1	3	1	3	3	3	1	3	3	3	2	3
